# Supplementary material for: Synthesis of polysubstituted azetidines via cascade trifluoromethylation/cyclization of N-allyl ynamides
Source: Royal Society of Chemistry journal article supplement (doi:10.1039/d1qo00559f), 2021-01-01

*Supporting Information of*

**Synthesis of polysubstituted azetidines via cascade trifluoromethylation/cyclization of *N*-allyl  
ynamides**

*Genlai Zhou,<sup>a</sup> Jingwen Su,<sup>a</sup> Tianbo Shang,<sup>a</sup> Xiaojuan Wang,<sup>a</sup> Yihui Bai,<sup>a\*</sup>  
Zheliang Yuan,<sup>a\*</sup> and Gangguo Zhu<sup>a\*</sup>*

Contents

|                                                             |         |
|-------------------------------------------------------------|---------|
| General.....                                                | S2      |
| General procedures for experiments and analytical data..... | S2-S16  |
| NMR spectra.....                                            | S17-S54 |
| X-Ray crystallographic data.....                            | S55-S58 |

**General.** Unless otherwise noted, materials obtained from commercial suppliers were used directly without further purification.  $^1\text{H}$ ,  $^{13}\text{C}$ , and  $^{19}\text{F}$  NMR spectra were measured on a 600 MHz or 400 MHz NMR spectrometer using  $\text{CDCl}_3$  as the solvent with tetramethylsilane (TMS) as the internal standard. The following abbreviations were used to explain the multiplicities: s = singlet, d = doublet, t = triplet, q = quartet, m = multiplet. The proton-decoupled  $^{19}\text{F}$  NMR spectroscopy was used to determine the  $^{19}\text{F}$  NMR data. Chemical shifts ( $\delta$ ) are given in parts per million relative to TMS, and the coupling constants are given in hertz. High-resolution mass spectrometry (HRMS) analysis were carried out using a TOF MS instrument with an ESI source. Melting points reported here were measured by a melting point instrument and were uncorrected. The starting materials **1** were prepared via the Cu-catalyzed coupling of allyl amides with bromoalkynes reported in the literature.<sup>1</sup>

**General procedure A for the synthesis of polysubstituted azetidines via a cascade trifluoromethylation/cyclization of *N*-allyl ynamides**

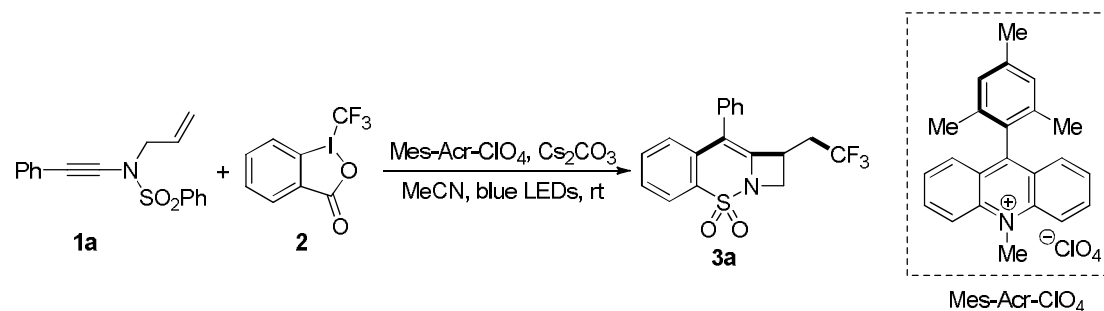

To a mixture of **1a** (60.0 mg, 0.2 mmol), **2** (126.4 mg, 0.4 mmol), and Cs<sub>2</sub>CO<sub>3</sub> (141.1 mg, 0.4 mmol) in 3 mL of dry MeCN was added Mes-Acr-ClO<sub>4</sub> (3.3 mg, 0.008 mmol) under a nitrogen atmosphere. After 36 h of irradiation at a distance of ~5 cm from 15 W blue LEDs (BESTLLON<sup>®</sup> lamps, 450 nm, 100% light intensity) at 25 °C, the reaction mixture was quenched with water, extracted with EtOAc, washed with brine, dried over anhydrous Na<sub>2</sub>SO<sub>4</sub>, and concentrated. Column chromatography on silica gel (petroleum ethers/EtOAc = 20:1) gave 51 mg (70% yield) of **3a** as a light yellow solid; mp 156-158 °C; Flash column chromatography conditions: petroleum ethers/EtOAc = 20:1;  $^1\text{H}$  NMR (600 MHz,  $\text{CDCl}_3$ )  $\delta$  8.06 (d,  $J$  = 7.9 Hz, 1H), 7.53–7.51 (m, 1H), 7.49–7.43 (m, 4H), 7.32–7.30 (m, 2H), 7.15 (d,  $J$  = 8.0 Hz, 1H), 4.44–4.42 (m, 1H), 4.39–4.37 (m,

<sup>1</sup> W.-B. Shen, X.-T. Tang, T.-T. Zhang, D.-C. Lv, D. Zhao, T.-F. Su and L. Meng, Copper(I)-catalyzed enyne oxidation/cyclopropanation: divergent and enantioselective synthesis of cyclopropanes, *Org. Lett.*, 2021, **23**, 1285.

1H), 3.97–3.93 (m, 1H), 2.38–2.28 (m, 1H), 2.06–1.98 (m, 1H);  $^{13}\text{C}$  NMR (151 MHz,  $\text{CDCl}_3$ )  $\delta$  144.3, 134.9, 132.7, 131.8, 131.3, 129.6, 129.3, 128.6, 127.4, 125.8, 125.7 (q,  $J = 277.3$  Hz), 123.7, 115.7, 49.9, 34.4 (q,  $J = 3.2$  Hz), 33.8 (q,  $J = 29.0$  Hz);  $^{19}\text{F}$  NMR (565 MHz,  $\text{CDCl}_3$ )  $\delta$  -65.6; HRMS (ESI) calcd for  $\text{C}_{18}\text{H}_{15}\text{F}_3\text{NO}_2\text{S}$   $[\text{M} + \text{H}]^+$  366.0770, found 366.0774.

**General procedure B for the synthesis of polysubstituted azetidines via a cascade trifluoromethylation/cyclization of *N*-allyl ynamides**

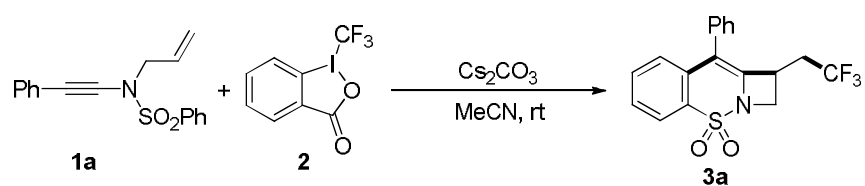

To a mixture of **1a** (60.0 mg, 0.2 mmol) and **2** (126.4 mg, 0.4 mmol) in 3 mL of dry MeCN was added  $\text{Cs}_2\text{CO}_3$  (141.1 mg, 0.4 mmol) under a nitrogen atmosphere. After stirring at 25 °C for 36 h, the reaction mixture was quenched with water, extracted with EtOAc, washed with brine, dried over anhydrous  $\text{Na}_2\text{SO}_4$ , and concentrated. Column chromatography on silica gel (petroleum ethers/EtOAc = 20:1) gave 47 mg (64% yield) of **3a** as a light yellow solid.

**Scale-up synthesis of 3a**

To a mixture of **1a** (297 mg, 1.0 mmol) and **2** (632 mg, 2.0 mmol) in 15 mL of dry MeCN was added  $\text{Cs}_2\text{CO}_3$  (750 mg, 2.0 mmol) under a nitrogen atmosphere. After stirring at 25 °C for 36 h, the reaction mixture was quenched with water, extracted with EtOAc, washed with brine, dried over anhydrous  $\text{Na}_2\text{SO}_4$ , and concentrated. Column chromatography on silica gel (petroleum ethers/EtOAc = 20:1) gave 248 mg (68% yield) of **3a** as a light yellow solid.

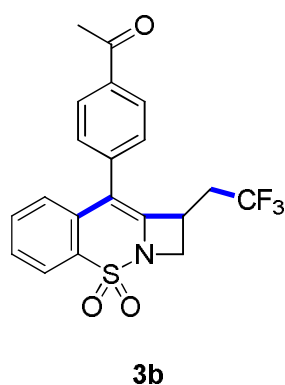

**Compound 3b:** 58 mg, 71% yield (general procedure A), light yellow solid, mp 154-156 °C; Flash column chromatography conditions: petroleum ethers/EtOAc = 20:1; <sup>1</sup>H NMR (600 MHz, CDCl<sub>3</sub>) δ 8.07 (d, *J* = 8.2 Hz, 3H), 7.54 (t, *J* = 7.7 Hz, 1H), 7.48 (t, *J* = 7.6 Hz, 1H), 7.44 (d, *J* = 8.2 Hz, 2H), 7.11 (d, *J* = 7.9 Hz, 1H), 4.46–4.39 (m, 2H), 4.05–3.93 (m, 1H), 2.67 (s, 3H), 2.40–2.32 (m, 1H), 2.05–2.00 (m, 1H); <sup>13</sup>C NMR (151 MHz, CDCl<sub>3</sub>) δ 197.2, 145.2, 137.0, 137.0, 134.2, 132.9, 131.3, 129.8, 129.2, 127.7, 125.6, 125.6 (q, *J* = 277.4 Hz), 123.9, 114.8, 50.0, 34.5 (q, *J* = 3.0 Hz), 33.8 (q, *J* = 29.1 Hz), 26.7; <sup>19</sup>F NMR (565 MHz, CDCl<sub>3</sub>) δ -65.5; HRMS (ESI) calcd for C<sub>20</sub>H<sub>17</sub>F<sub>3</sub>NO<sub>2</sub>S [M + H]<sup>+</sup> 408.0876, found, 408.0873. 49 mg (60% yield) of the title compound could be obtained using the general procedure B as a light yellow solid.

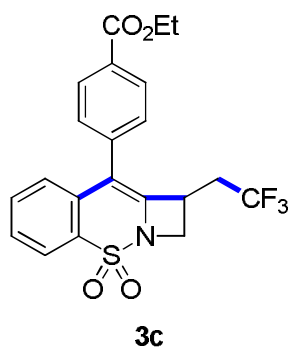

**Compound 3c:** 69 mg, 79% yield (general procedure A), gray solid, mp 158-160 °C; Flash column chromatography conditions: petroleum ethers/EtOAc = 15:1; <sup>1</sup>H NMR (600 MHz, CDCl<sub>3</sub>) δ 8.15 (d, *J* = 8.2 Hz, 2H), 8.07 (d, *J* = 7.7 Hz, 1H), 7.53 (t, *J* = 7.3 Hz, 1H), 7.48 (t, *J* = 7.5 Hz, 1H), 7.48 (t, *J* = 7.5 Hz, 1H), 7.41 (d, *J* = 8.2 Hz, 2H), 7.11 (d, *J* = 7.9 Hz, 1H), 4.46–4.38 (m, 4H), 4.05–3.96 (m, 1H), 2.47–2.17 (m, 1H), 2.11–1.94 (m, 1H), 1.43 (t, *J* = 7.1 Hz, 3H); <sup>13</sup>C NMR (151 MHz, CDCl<sub>3</sub>) δ 165.9, 145.1, 136.7, 134.3, 132.9, 131.3, 130.7, 130.5, 129.6, 127.6, 125.6, 125.6 (q, *J* = 277.4 Hz), 123.9, 114.9, 61.3, 50.0, 34.5 (q, *J* = 3.1 Hz), 33.4 (q, *J* = 29.0 Hz), 14.3; <sup>19</sup>F NMR (565 MHz, CDCl<sub>3</sub>) δ -65.5; HRMS (ESI) calcd for C<sub>21</sub>H<sub>19</sub>F<sub>3</sub>NO<sub>4</sub>S [M + H]<sup>+</sup> 438.0981, found 438.0968. 71 mg (81% yield) of the title compound could be obtained using the general procedure B as a gray solid.



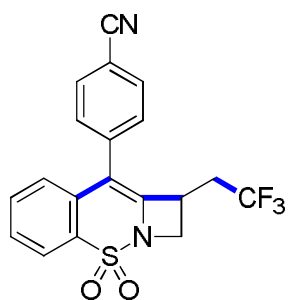

**3d**

*Compound 3d*: 59 mg, 75% yield (general procedure A), gray solid, mp 179-181 °C; Flash column chromatography conditions: petroleum ethers/EtOAc = 15:1;  $^1\text{H}$  NMR (600 MHz,  $\text{CDCl}_3$ )  $\delta$  8.08 (d,  $J = 7.9$  Hz, 1H), 7.79 (d,  $J = 8.2$  Hz, 2H), 7.56 (t,  $J = 7.7$  Hz, 1H), 7.50 (t,  $J = 7.6$  Hz, 1H), 7.47 (d,  $J = 8.2$  Hz, 2H), 7.07 (d,  $J = 7.9$  Hz, 1H), 4.46–4.43 (m, 1H), 4.43–4.41 (m, 1H), 3.97–3.95 (m, 1H), 2.40–2.32 (m, 1H), 2.00–1.96 (m, 1H);  $^{13}\text{C}$  NMR (151 MHz,  $\text{CDCl}_3$ )  $\delta$  145.7, 137.1, 133.8, 133.1, 133.0, 131.4, 130.4, 127.9, 125.4 (q,  $J = 277.4$  Hz), 125.4, 124.0, 118.1, 114.2, 112.6, 50.1, 34.4 (q,  $J = 3.1$  Hz), 33.9 (q,  $J = 29.2$  Hz);  $^{19}\text{F}$  NMR (565 MHz,  $\text{CDCl}_3$ )  $\delta$  -65.5; HRMS (ESI) calcd for  $\text{C}_{19}\text{H}_{14}\text{F}_3\text{N}_2\text{O}_2\text{S}$   $[\text{M} + \text{H}]^+$  391.0723, found 391.0723. 56 mg (72% yield) of the title compound could be obtained using the general procedure B as a gray solid.

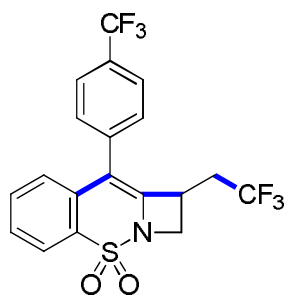

**3e**

*Compound 3e*: 55 mg, 63% yield (general procedure A), light yellow solid, mp 179-181 °C; Flash column chromatography conditions: petroleum ethers/EtOAc = 20:1;  $^1\text{H}$  NMR (600 MHz,  $\text{CDCl}_3$ )  $\delta$  8.08 (d,  $J = 7.1$  Hz, 1H), 7.75 (d,  $J = 8.1$  Hz, 2H), 7.55 (t,  $J = 7.2$  Hz, 1H), 7.49 (d,  $J = 7.4$  Hz, 1H), 7.47 (d,  $J = 8.3$  Hz, 2H), 7.08 (d,  $J = 7.9$  Hz, 1H), 4.46–4.40 (m, 2H), 3.99–3.96 (m, 1H), 2.40–2.34 (m, 1H), 2.04–1.96 (m, 1H);  $^{13}\text{C}$  NMR (151 MHz,  $\text{CDCl}_3$ )  $\delta$  145.3, 136.0, 134.2, 133.0, 131.3, 130.9 (q,  $J = 30.0$  Hz), 130.1, 127.7, 126.3 (q,  $J = 3.6$  Hz), 125.6 (q,  $J = 277.5$  Hz), 125.5, 123.9, 123.9 (q,  $J = 272.3$  Hz), 114.5, 50.0, 34.4 (q,  $J = 3.1$  Hz), 34.0 (q,  $J = 29.1$  Hz);  $^{19}\text{F}$  NMR (565 MHz,  $\text{CDCl}_3$ )  $\delta$  -62.7, -65.5; HRMS (ESI) calcd for  $\text{C}_{19}\text{H}_{13}\text{F}_6\text{NO}_2\text{S}$   $[\text{M} + \text{H}]^+$  434.0644,

found 434.0646. 56 mg (65% yield) of the title compound could be obtained using the general procedure B as a light yellow solid.

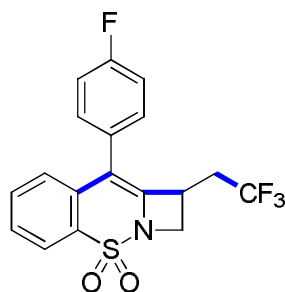

**3f**

Compound **3f**: 49 mg, 64% yield (general procedure A), light yellow solid, mp 185-187 °C; Flash column chromatography conditions: petroleum ethers/EtOAc = 20:1; <sup>1</sup>H NMR (600 MHz, CDCl<sub>3</sub>) δ 8.06 (d, *J* = 7.9 Hz, 1H), 7.53 (t, *J* = 7.7 Hz, 1H), 7.46 (t, *J* = 7.6 Hz, 1H), 7.32–7.28 (m, 2H), 7.18 (t, *J* = 8.5 Hz, 2H), 7.10 (d, *J* = 8.0 Hz, 1H), 4.43–4.37(m, 2H), 3.95–3.91 (m, 1H), 2.38–2.32 (m, 1H), 2.10–1.95 (m, 1H); <sup>13</sup>C NMR (151 MHz, CDCl<sub>3</sub>) δ 162.7 (d, *J* = 249.1 Hz), 144.5, 134.8, 132.8, 131.4 (d, *J* = 8.2 Hz), 131.3, 127.8 (d, *J* = 3.4 Hz), 127.5, 125.6 (q, *J* = 277.4 Hz), 125.6, 123.8, 116.5 (d, *J* = 21.6 Hz), 114.7, 49.9, 34.3 (q, *J* = 3.2 Hz), 33.9 (q, *J* = 28.9 Hz); <sup>19</sup>F NMR (565 MHz, CDCl<sub>3</sub>) δ -65.6, -112.2; HRMS (ESI) calcd for C<sub>18</sub>H<sub>14</sub>F<sub>4</sub>NO<sub>2</sub>S [M + H]<sup>+</sup> 384.0676, found 384.0675. 48 mg (63% yield) of the title compound could be obtained using the general procedure B as a light yellow solid.

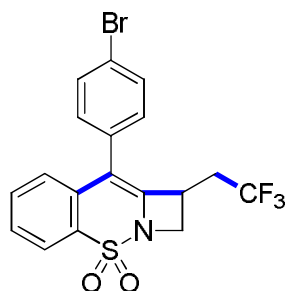

**3g**

Compound **3g**: 60 mg, 68% yield (general procedure A), light yellow solid, mp 135-137 °C; Flash column chromatography conditions: petroleum ethers/EtOAc = 20:1; <sup>1</sup>H NMR (600 MHz, CDCl<sub>3</sub>) δ 8.06 (d, *J* = 7.9 Hz, 1H), 7.62 (d, *J* = 8.3 Hz, 2H), 7.53 (t, *J* = 7.7 Hz, 1H), 7.47 (t, *J* = 7.6 Hz, 1H), 7.20 (d, *J* = 8.3 Hz, 2H), 7.10 (d, *J* = 8.0 Hz, 1H), 4.44–4.38 (m, 2H), 3.96–3.92 (m, 1H),

2.43–2.29 (m, 1H), 2.15–2.00 (m, 1H);  $^{13}\text{C}$  NMR (151 MHz,  $\text{CDCl}_3$ )  $\delta$  144.7, 134.4, 132.8, 132.6, 131.3, 131.2, 130.9, 127.6, 125.6 (q,  $J = 277.4$  Hz), 125.6, 123.8, 122.9, 114.6, 49.9, 34.4 (q,  $J = 3.1$  Hz), 33.9 (q,  $J = 29.0$  Hz);  $^{19}\text{F}$  NMR (565 MHz,  $\text{CDCl}_3$ )  $\delta$  -65.5; HRMS (ESI) calcd for  $\text{C}_{18}\text{H}_{14}\text{BrF}_3\text{NO}_2\text{S}$   $[\text{M} + \text{H}]^+$  443.9875, found 443.9875. 58 mg (66% yield) of the title compound could be obtained using the general procedure B as a light yellow solid.

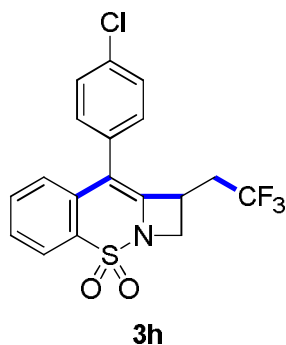

*Compound 3h*: 52 mg, 65% yield (general procedure A), light yellow solid, mp 155-157 °C; Flash column chromatography conditions: petroleum ethers/EtOAc = 20:1;  $^1\text{H}$  NMR (600 MHz,  $\text{CDCl}_3$ )  $\delta$  8.06 (d,  $J = 7.9$  Hz, 1H), 7.53 (t,  $J = 7.7$  Hz, 1H), 7.48–7.45 (m, 3H), 7.26 (d,  $J = 8.4$  Hz, 2H), 7.10 (d,  $J = 7.9$  Hz, 1H), 4.44–4.38 (m, 2H), 4.00–3.89 (m, 1H), 2.45–2.28 (m, 1H), 2.11–1.98 (m, 1H);  $^{13}\text{C}$  NMR (151 MHz,  $\text{CDCl}_3$ )  $\delta$  144.7, 134.7, 134.5, 132.8, 131.3, 131.0, 130.4, 129.6, 127.6, 125.6 (q,  $J = 277.4$  Hz), 125.6, 123.8, 114.6, 49.9, 34.4 (q,  $J = 3.1$  Hz), 33.9 (q,  $J = 29.0$  Hz);  $^{19}\text{F}$  NMR (565 MHz,  $\text{CDCl}_3$ )  $\delta$  -65.5; HRMS (ESI) calcd for  $\text{C}_{18}\text{H}_{14}\text{ClF}_3\text{NO}_2\text{S}$   $[\text{M} + \text{H}]^+$  400.0380, found 400.0382. 53 mg (67% yield) of the title compound could be obtained using the general procedure B as a light yellow solid.

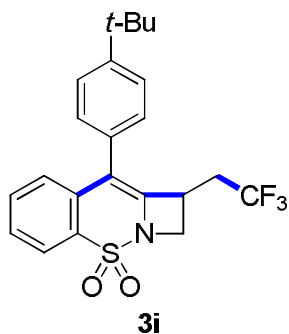

*Compound 3i*: 50 mg, 60% yield (general procedure A), light yellow solid, mp 163-165 °C; Flash column chromatography conditions: petroleum ethers/EtOAc = 20:1;  $^1\text{H}$  NMR (600 MHz,  $\text{CDCl}_3$ )

$\delta$  8.06 (d,  $J = 7.8$  Hz, 1H), 7.52 (t,  $J = 7.6$  Hz, 1H), 7.47 (d,  $J = 8.2$  Hz, 2H), 7.44 (t,  $J = 7.6$  Hz, 1H), 7.22 (d,  $J = 8.2$  Hz, 2H), 7.18 (d,  $J = 8.0$  Hz, 1H), 4.42–4.37 (m, 2H), 3.97–3.93 (m, 1H), 2.35–2.33 (m, 1H), 2.08–2.05 (m, 1H), 1.37 (s, 9H);  $^{13}\text{C}$  NMR (151 MHz,  $\text{CDCl}_3$ )  $\delta$  151.7, 144.0, 135.1, 132.7, 131.3, 129.2, 128.7, 127.3, 126.1, 126.0, 125.8 (q,  $J = 277.4$  Hz), 123.7, 115.7, 49.8, 34.7, 34.5 (q,  $J = 3.1$  Hz), 33.9 (q,  $J = 28.8$  Hz), 31.3;  $^{19}\text{F}$  NMR (565 MHz,  $\text{CDCl}_3$ )  $\delta$  -62.7; HRMS (ESI) calcd for  $\text{C}_{19}\text{H}_{17}\text{ClF}_3\text{NO}_2\text{S}$  [ $\text{M} + \text{H}$ ] $^+$  422.1396, found 422.1400. 47 mg (56% yield) of the title compound could be obtained using the general procedure B as a light yellow solid.

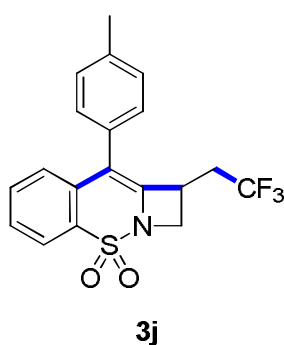

**Compound 3j**: 55 mg, 72% yield (general procedure A), light yellow solid, mp 153–155  $^\circ\text{C}$ ; Flash column chromatography conditions: petroleum ethers/EtOAc = 20:1;  $^1\text{H}$  NMR (600 MHz,  $\text{CDCl}_3$ )  $\delta$  8.06 (d,  $J = 7.9$  Hz, 1H), 7.51 (t,  $J = 7.7$  Hz, 1H), 7.45 (t,  $J = 7.6$  Hz, 1H), 7.27 (d,  $J = 7.8$  Hz, 2H), 7.19 (d,  $J = 8.0$  Hz, 2H), 7.16 (d,  $J = 8.0$  Hz, 1H), 4.43–4.36 (m, 2H), 3.95–3.93 (m, 1H), 2.42 (s, 3H), 2.39–2.28 (m, 1H), 2.14–1.99 (m, 1H);  $^{13}\text{C}$  NMR (151 MHz,  $\text{CDCl}_3$ )  $\delta$  144.0, 138.6, 135.1, 132.7, 131.4, 130.0, 129.5, 128.7, 127.3, 125.9, 125.8 (q,  $J = 277.2$  Hz), 123.7, 115.7, 49.8, 34.5 (q,  $J = 3.3$  Hz), 33.9 (q,  $J = 28.9$  Hz), 21.3;  $^{19}\text{F}$  NMR (565 MHz,  $\text{CDCl}_3$ )  $\delta$  -65.6; HRMS (ESI) calcd for  $\text{C}_{19}\text{H}_{17}\text{ClF}_3\text{NO}_2\text{S}$  [ $\text{M} + \text{H}$ ] $^+$  380.0927, found 380.0925. 50 mg (66% yield) of the title compound could be obtained using the general procedure B as a light yellow solid.

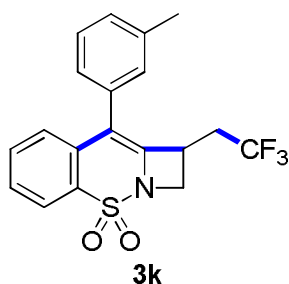

**Compound 3k:** 55 mg, 73% yield (general procedure A), light yellow solid, mp 103-105 °C; Flash column chromatography conditions: petroleum ethers/EtOAc = 20:1; <sup>1</sup>H NMR (600 MHz, CDCl<sub>3</sub>) δ 8.06 (d, *J* = 7.9 Hz, 1H), 7.52 (t, *J* = 7.7 Hz, 1H), 7.45 (t, *J* = 7.6 Hz, 1H), 7.35 (t, *J* = 7.6 Hz, 1H), 7.24 (d, *J* = 7.6 Hz, 1H), 7.17 (d, *J* = 7.5 Hz, 1H), 7.12 (s, 1H), 7.10 (d, *J* = 7.6 Hz, 1H), 4.43–4.36 (m, 2H), 3.97–3.92 (m, 1H), 2.40 (s, 3H), 2.37–2.28 (m, 1H), 2.10–1.97 (m, 1H); <sup>13</sup>C NMR (151 MHz, CDCl<sub>3</sub>) δ 144.1, 139.0, 135.0, 132.7, 131.7, 131.3, 130.2, 129.4, 129.1, 127.3, 126.6, 125.9, 125.8 (q, *J* = 277.3 Hz), 123.7, 115.8, 49.9, 34.4 (q, *J* = 3.2 Hz), 33.9 (q, *J* = 28.9 Hz), 21.4; <sup>19</sup>F NMR (565 MHz, CDCl<sub>3</sub>) δ -65.6; HRMS (ESI) calcd for C<sub>19</sub>H<sub>17</sub>F<sub>3</sub>NO<sub>2</sub>S [M + H]<sup>+</sup> 380.0927, found 380.0910. 53mg (70% yield) of the title compound could be obtained using the general procedure B as a light yellow solid.

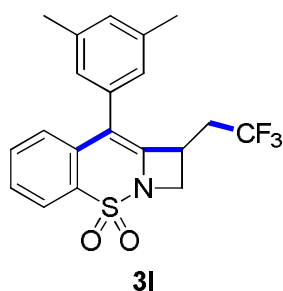

**Compound 3l:** 40 mg, 51% yield (general procedure A), light yellow solid, mp 143-145 °C; Flash column chromatography conditions: petroleum ethers/EtOAc = 20:1; <sup>1</sup>H NMR (600 MHz, CDCl<sub>3</sub>) δ 8.05 (d, *J* = 7.9 Hz, 1H), 7.52 (t, *J* = 7.6, 1H), 7.44 (t, *J* = 7.6 Hz, 1H), 7.18 (d, *J* = 8.0, 1H), 7.05 (s, 1H), 6.91 (s, 2H), 4.42–4.35 (m, 2H), 3.96–3.94 (m, 1H), 2.35 (s, 6H), 2.34–2.21 (m, 1H), 2.10–2.03 (m, 1H); <sup>13</sup>C NMR (151 MHz, CDCl<sub>3</sub>) δ 143.9, 138.9, 135.1, 132.7, 131.6, 131.4, 130.2, 127.3, 127.2, 126.0, 125.8 (q, *J* = 277.4 Hz), 123.6, 116.0, 49.9, 34.5 (q, *J* = 3.2 Hz), 33.9 (q, *J* = 29.0 Hz), 21.3; <sup>19</sup>F NMR (565 MHz, CDCl<sub>3</sub>) δ -65.7; HRMS (ESI) calcd for C<sub>20</sub>H<sub>19</sub>F<sub>3</sub>NO<sub>2</sub>S [M + H]<sup>+</sup> 394.1083, found 394.1089. 35 mg (44% yield) of the title compound could be obtained using the general procedure B as a light yellow solid.

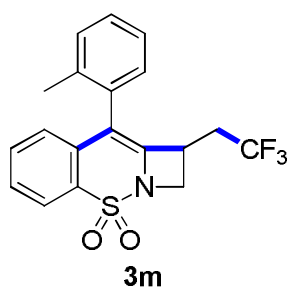

*Compound 3m*: 42 mg, 55% yield (general procedure A), light yellow oil; Flash column chromatography conditions: petroleum ethers/EtOAc = 20:1; dr = 1.5:1; The two rotamers can't be separated after flash column chromatography. Data of the major rotamer:  $^1\text{H}$  NMR (600 MHz,  $\text{CDCl}_3$ )  $\delta$  8.06 (d,  $J = 7.9$  Hz, 1H), 7.51–7.46 (m, 1H), 7.44 (t,  $J = 7.6$  Hz, 1H), 7.40–7.34 (m, 1H), 7.35–7.27 (m, 2H), 7.21 (d,  $J = 7.6$  Hz, 1H), 6.84 (d,  $J = 7.9$  Hz, 1H), 4.48–4.42 (m, 1H), 4.33 (dd,  $J = 7.4, 7.4$  Hz, 1H), 3.91–3.80 (m, 1H), 2.34–2.22 (m, 1H), 2.09 (s, 3H), 1.85–1.73 (m, 1H);  $^{13}\text{C}$  NMR (151 MHz,  $\text{CDCl}_3$ )  $\delta$  144.5, 137.8, 134.8, 132.9, 131.1, 130.9, 130.8, 130.4, 129.2, 127.3, 126.7, 125.6 (q,  $J = 277.4$  Hz), 125.3, 123.8, 115.2, 49.7, 34.1 (q,  $J = 3.3$  Hz), 33.1 (q,  $J = 28.9$  Hz), 19.9;  $^{19}\text{F}$  NMR (565 MHz,  $\text{CDCl}_3$ )  $\delta$  -65.4. Data of the Minor rotamer:  $^1\text{H}$  NMR (600 MHz,  $\text{CDCl}_3$ )  $\delta$  8.06 (d,  $J = 7.9$  Hz, 1H), 7.52–7.47 (m, 1H), 7.44 (t,  $J = 7.6$ , 1H), 7.41–7.33 (m, 1H), 7.33–7.27 (m, 2H), 7.16 (d,  $J = 7.6$  Hz, 1H), 6.82 (d,  $J = 7.9$  Hz, 1H), 4.56 (dd,  $J = 7.4, 7.4$  Hz, 1H), 4.29 (dd,  $J = 7.8, 4.7$  Hz, 1H), 3.67–3.55 (m, 1H), 2.55–2.42 (m, 1H), 2.19 (s, 3H), 2.18–2.00 (m, 1H);  $^{13}\text{C}$  NMR (151 MHz,  $\text{CDCl}_3$ )  $\delta$  144.4, 138.0, 135.2, 132.8, 131.2, 131.0, 130.8, 130.7, 129.1, 127.3, 126.3, 125.6 (q,  $J = 277.9$  Hz), 125.5, 123.6, 114.6, 49.9, 35.3 (q,  $J = 28.8$  Hz), 34.6 (q,  $J = 3.3$  Hz), 19.5;  $^{19}\text{F}$  NMR (565 MHz,  $\text{CDCl}_3$ )  $\delta$  -65.6; HRMS (ESI) Calcd for  $\text{C}_{19}\text{H}_{17}\text{F}_3\text{NO}_2\text{S}$   $[\text{M} + \text{H}]^+$  380.0927, found 380.0927. 43 mg (57% yield) of the title compound could be obtained using the general procedure B as a light yellow oil.

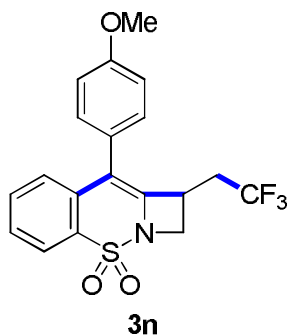

*Compound 3n*: 59 mg, 75% yield (general procedure A), light yellow solid, mp 124–126 °C; Flash

column chromatography conditions: petroleum ethers/EtOAc = 20:1;  $^1\text{H}$  NMR (600 MHz,  $\text{CDCl}_3$ )  $\delta$  8.05 (d,  $J = 7.9$  Hz, 1H), 7.52 (t,  $J = 7.9$  Hz, 1H), 7.44 (t,  $J = 7.8$  Hz, 1H), 7.22 (d,  $J = 8.7$  Hz, 1H), 7.16 (d,  $J = 8.0$  Hz, 1H), 6.99 (d,  $J = 8.7$  Hz, 1H), 4.43–4.35 (m, 2H), 3.94–3.87 (m, 1H), 3.87 (s, 3H), 2.36–2.32 (m, 1H), 2.09–2.04 (m, 1H);  $^{13}\text{C}$  NMR (151 MHz,  $\text{CDCl}_3$ )  $\delta$  159.7, 143.8, 135.2, 132.7, 131.4, 130.8, 127.3, 125.8, 125.8 (q,  $J = 277.4$  Hz), 123.7, 123.7, 115.4, 114.7, 55.3, 49.8, 34.4 (q,  $J = 3.2$  Hz), 33.9 (q,  $J = 28.8$  Hz);  $^{19}\text{F}$  NMR (565 MHz,  $\text{CDCl}_3$ )  $\delta$  -65.5; HRMS (ESI) calcd for  $\text{C}_{19}\text{H}_{17}\text{F}_3\text{NO}_3\text{S}$   $[\text{M} + \text{H}]^+$  396.0876, found 396.0864. 49 mg (62% yield) of the title compound could be obtained using the general procedure B as a light yellow solid.

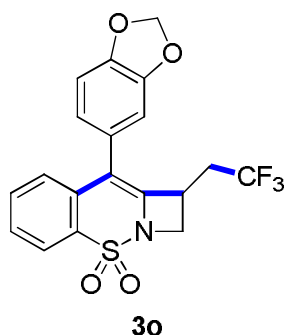

*Compound 30*: 56 mg, 68% yield (general procedure A), light yellow solid, mp 130-132 °C; Flash column chromatography conditions: petroleum ethers/EtOAc = 20:1;  $^1\text{H}$  NMR (600 MHz,  $\text{CDCl}_3$ )  $\delta$  8.05 (d,  $J = 7.9$  Hz, 1H), 7.53 (t,  $J = 7.7$  Hz, 1H), 7.45 (t,  $J = 7.7$  Hz, 1H), 7.17 (d,  $J = 8.0$  Hz, 1H), 6.90 (d,  $J = 8.3$  Hz, 1H), 6.76 (td,  $J = 4.1, 1.7$  Hz, 2H), 6.06 (d,  $J = 2.7$  Hz, 1H), 4.43–4.35 (m, 2H), 3.93–3.91 (m, 1H), 2.44–2.29 (m, 1H), 2.24–2.07 (m, 1H);  $^{13}\text{C}$  NMR (151 MHz,  $\text{CDCl}_3$ )  $\delta$  148.4, 147.9, 144.2, 135.0, 132.7, 131.3, 127.4, 125.8 (q,  $J = 277.5$  Hz), 125.8, 125.2, 123.7, 123.2, 115.4, 109.8, 109.0, 101.5, 49.8, 34.4 (q,  $J = 3.2$  Hz), 34.0 (q,  $J = 28.2$  Hz);  $^{19}\text{F}$  NMR (565 MHz,  $\text{CDCl}_3$ )  $\delta$  -65.5; HRMS (ESI) calcd for  $\text{C}_{19}\text{H}_{15}\text{F}_3\text{NO}_4\text{S}$   $[\text{M} + \text{H}]^+$  410.0668, found 410.0667.

56 mg (68% yield) of the title compound could be obtained using the general procedure B as a light yellow solid.

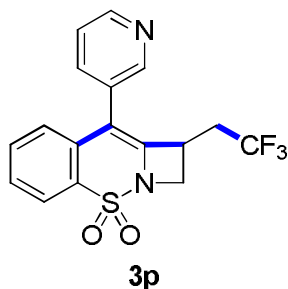

*Compound 3p*: 47 mg, 64% yield (general procedure A), light yellow solid, mp 148-150 °C; Flash column chromatography conditions: petroleum ethers/EtOAc = 1:1;  $^1\text{H}$  NMR (600 MHz,  $\text{CDCl}_3$ )  $\delta$  8.71 (d,  $J = 3.6$  Hz, 1H), 8.60 (d,  $J = 1.4$  Hz, 1H), 8.08 (dd,  $J = 7.9, 0.9$  Hz, 1H), 7.67 (dt,  $J = 7.8, 1.9$  Hz, 1H), 7.55 (td,  $J = 7.9, 1.3$  Hz, 1H), 7.49 (t,  $J = 7.6$  Hz, 1H), 7.44 (dd,  $J = 7.7, 4.9$  Hz, 1H), 7.06 (d,  $J = 7.8$  Hz, 1H), 4.44 (d,  $J = 6.0$  Hz, 2H), 4.00–3.94 (m, 1H), 2.42–2.36 (m, 1H), 2.05–2.00 (m, 1H);  $^{13}\text{C}$  NMR (151 MHz,  $\text{CDCl}_3$ )  $\delta$  150.3, 150.0, 145.7, 137.2, 134.2, 133.0, 131.3, 128.2, 127.8, 125.5 (q,  $J = 277.5$  Hz), 125.3, 124.0, 124.0, 112.1, 50.0, 34.4 (q,  $J = 3.1$  Hz), 34.2 (q,  $J = 29.1$  Hz);  $^{19}\text{F}$  NMR (565 MHz,  $\text{CDCl}_3$ )  $\delta$  -65.4; HRMS (ESI) calcd for  $\text{C}_{19}\text{H}_{17}\text{F}_3\text{NO}_2\text{S}$  [ $\text{M} + \text{H}$ ] $^+$  367.0723, found 367.0722. 40 mg (55% yield) of the title compound could be obtained using the general procedure B as a light yellow solid.

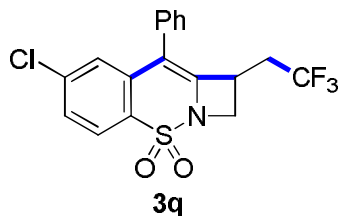

*Compound 3q*: 50 mg, 60% yield (general procedure A), light yellow solid, mp 168-170 °C; Flash column chromatography conditions: petroleum ethers/EtOAc = 20:1;  $^1\text{H}$  NMR (600 MHz,  $\text{CDCl}_3$ )  $\delta$  7.99 (d,  $J = 8.5$  Hz, 1H), 7.53–7.45 (m, 3H), 7.41 (d,  $J = 8.5$  Hz, 1H), 7.29 (d,  $J = 6.9$  Hz, 2H), 7.10 (d,  $J = 1.7$  Hz, 1H), 4.46–4.37 (m, 2H), 4.01–3.88 (m, 1H), 2.43–2.24 (m, 1H), 2.02–1.98 (m, 1H);  $^{13}\text{C}$  NMR (151 MHz,  $\text{CDCl}_3$ )  $\delta$  145.8, 139.5, 136.7, 131.1, 129.6, 129.5, 129.0, 128.3, 127.4, 125.6, 125.6 (q,  $J = 277.3$  Hz), 125.4, 115.0, 50.1, 34.5 (q,  $J = 3.1$  Hz), 33.8 (q,  $J = 29.0$  Hz);  $^{19}\text{F}$  NMR (565 MHz,  $\text{CDCl}_3$ )  $\delta$  -65.6; HRMS (ESI) calcd for  $\text{C}_{18}\text{H}_{13}\text{ClF}_3\text{NO}_2\text{SNa}$  [ $\text{M} + \text{Na}$ ] $^+$  422.0200, found 422.0180. 44 mg (52% yield) of the title compound could be obtained using the general procedure B as a light yellow solid.



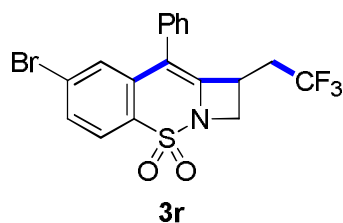

*Compound 3r*: 40 mg, 45% yield (general procedure A), white solid, mp 182-184 °C; Flash column chromatography conditions: petroleum ethers/EtOAc = 20:1 <sup>1</sup>H NMR (600 MHz, CDCl<sub>3</sub>) δ 7.96–7.78 (m, 1H), 7.76–7.56 (m, 1H), 7.54–7.45 (m, 3H), 7.34–7.28 (m, 2H), 7.26 (d, *J* = 2.4 Hz, 1H), 4.46–4.36 (m, 2H), 4.00–3.88 (m, 1H), 2.37–2.26 (m, 1H), 2.07–1.92 (m, 1H); <sup>13</sup>C NMR (151 MHz, CDCl<sub>3</sub>) δ 145.8, 136.7, 136.3, 134.5, 131.1, 130.4, 129.5, 129.0, 128.5, 125.62 (q, *J* = 277.5 Hz), 125.4, 125.1, 114.9, 50.1, 34.5 (q, *J* = 3.2 Hz), 33.8 (q, *J* = 28.9 Hz); <sup>19</sup>F NMR (565 MHz, CDCl<sub>3</sub>) δ -65.6; HRMS (ESI) calcd for C<sub>18</sub>H<sub>15</sub>F<sub>3</sub>NO<sub>2</sub>S [M + H]<sup>+</sup> 443.9865, found 443.9875. 35 mg (40% yield) of the title compound could be obtained using the general procedure B as a white solid.

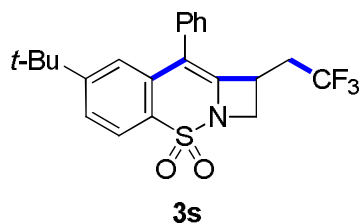

*Compound 3s*: 55 mg, 65% yield (general procedure A), light yellow solid, mp 193-195 °C; Flash column chromatography conditions: petroleum ethers/EtOAc = 20:1; <sup>1</sup>H NMR (600 MHz, CDCl<sub>3</sub>) δ 7.99 (d, *J* = 8.4 Hz, 1H), 7.52–7.46 (m, 3H), 7.44 (d, *J* = 7.4 Hz, 1H), 7.32 (d, *J* = 6.9 Hz, 2H), 7.16 (d, *J* = 1.8 Hz, 1H), 4.42–4.34 (m, 2H), 3.97–3.93 (m, 1H), 2.35–2.26 (m, 1H), 2.05–1.97 (m, 1H), 1.22 (s, 9H); <sup>13</sup>C NMR (151 MHz, CDCl<sub>3</sub>) δ 156.6, 144.1, 134.5, 132.0, 129.5, 129.2, 128.6, 128.6, 125.8 (q, *J* = 277.4 Hz), 124.7, 123.6, 122.8, 116.0, 49.8, 35.2, 34.4 (q, *J* = 3.1 Hz), 33.8 (q, *J* = 28.9 Hz), 30.9; <sup>19</sup>F NMR (565 MHz, CDCl<sub>3</sub>) δ -65.6; HRMS (ESI) calcd for C<sub>18</sub>H<sub>15</sub>F<sub>3</sub>NO<sub>2</sub>S [M + H]<sup>+</sup> 422.1396, found 422.1377. 43 mg (51% yield) of the title compound could be obtained using the general procedure B as a light yellow solid.

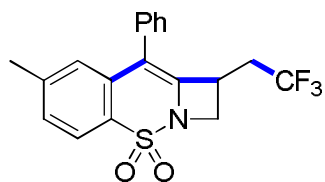

**3t**

*Compound 3t*: 56 mg, 74% yield (general procedure A), light yellow solid, mp 167-169 °C; Flash column chromatography conditions: petroleum ethers/EtOAc = 20:1;  $^1\text{H}$  NMR (600 MHz,  $\text{CDCl}_3$ )  $\delta$  7.95 (d,  $J = 8.1$  Hz, 1H), 7.48 (t,  $J = 7.2$  Hz, 2H), 7.45 (d,  $J = 7.1$  Hz, 1H), 7.32–7.28 (m, 2H), 7.28–7.22 (m, 1H), 6.92 (s, 1H), 4.41–4.34 (m, 2H), 3.94–3.91 (m, 1H), 2.33 (s, 3H), 2.31–2.24 (m, 1H), 2.00–1.96 (m, 1H);  $^{13}\text{C}$  NMR (151 MHz,  $\text{CDCl}_3$ )  $\delta$  144.3, 143.6, 134.8, 132.0, 129.6, 129.3, 128.7, 128.6, 128.2, 126.1, 125.7 (q,  $J = 277.3$  Hz), 123.8, 115.6, 49.8, 34.4 (q,  $J = 3.3$  Hz), 33.9 (q,  $J = 29.0$  Hz), 21.7;  $^{19}\text{F}$  NMR (565 MHz,  $\text{CDCl}_3$ )  $\delta$  -65.6; HRMS (ESI) calcd for  $\text{C}_{18}\text{H}_{15}\text{F}_3\text{NO}_2\text{S}$   $[\text{M} + \text{H}]^+$  380.0927, found 380.0915. 50 mg (66% yield) of the title compound could be obtained using the general procedure B as a light yellow solid.

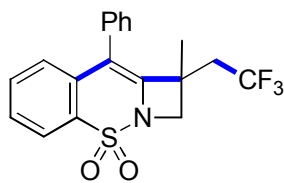

**3v**

*Compound 3v*: 58 mg, 76% yield (general procedure A), light yellow solid, mp 124-126 °C; Flash column chromatography conditions: petroleum ethers/EtOAc = 20:1;  $^1\text{H}$  NMR (600 MHz,  $\text{CDCl}_3$ )  $\delta$  8.06 (d,  $J = 7.8$  Hz, 1H), 7.54–7.40 (m, 5H), 7.34–7.24 (m, 2H), 6.94 (d,  $J = 7.9$  Hz, 1H), 4.51 (d,  $J = 7.6$  Hz, 1H), 4.08 (d,  $J = 7.6$  Hz, 1H), 2.63–2.48 (m, 1H), 2.11–1.84 (m, 1H), 1.52 (s, 3H);  $^{13}\text{C}$  NMR (151 MHz,  $\text{CDCl}_3$ )  $\delta$  149.6, 135.8, 132.7, 132.3, 130.8, 130.3, 129.1, 128.7, 127.2, 126.1, 125.7 (q,  $J = 278.6$  Hz), 123.5, 114.5, 55.3, 42.6 (q,  $J = 2.1$  Hz), 39.6 (q,  $J = 27.7$  Hz), 23.1;  $^{19}\text{F}$  NMR (565 MHz,  $\text{CDCl}_3$ )  $\delta$  -61.2; HRMS (ESI) calcd for  $\text{C}_{19}\text{H}_{17}\text{F}_3\text{NO}_2\text{S}$   $[\text{M} + \text{H}]^+$  380.0927, found 380.0929. 55 mg (73% yield) of the title compound could be obtained using the general procedure B as a light yellow solid.

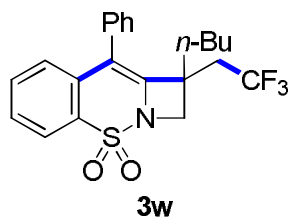

**Compound 3w:** 53 mg, 63% yield (general procedure A), light yellow solid, mp 123-125 °C; Flash column chromatography conditions: petroleum ethers/EtOAc = 20:1;  $^1\text{H}$  NMR (600 MHz,  $\text{CDCl}_3$ )  $\delta$  8.05 (dd,  $J = 7.8, 1.0$  Hz, 1H), 7.54–7.39 (m, 5H), 7.31–7.27 (m, 1H), 7.26–7.22 (m, 1H), 6.95 (d,  $J = 7.9$  Hz, 1H), 4.47 (d,  $J = 7.8$  Hz, 1H), 4.17 (d,  $J = 7.8$  Hz, 1H), 2.59–2.54 (m, 1H), 2.07–2.03 (m, 1H), 1.82–1.64 (m, 1H), 1.56–1.49 (m, 2H), 1.46 (dd,  $J = 11.9, 4.8$  Hz, 1H), 1.34 (tt,  $J = 13.9, 6.9$  Hz, 2H), 0.91 (t,  $J = 7.4$  Hz, 3H);  $^{13}\text{C}$  NMR (151 MHz,  $\text{CDCl}_3$ )  $\delta$  148.0, 135.7, 132.6, 132.5, 130.8, 130.3, 129.1, 128.7, 127.2, 126.0, 125.8 (q,  $J = 278.8$  Hz), 123.5, 114.9, 52.1, 46.8, 39.6 (q,  $J = 27.6$  Hz), 34.9, 26.7, 22.8, 13.8;  $^{19}\text{F}$  NMR (565 MHz,  $\text{CDCl}_3$ )  $\delta$  -60.6; HRMS (ESI) Calcd for  $\text{C}_{22}\text{H}_{23}\text{F}_3\text{NO}_2\text{S}$   $[\text{M} + \text{H}]^+$  422.1396, found 422.1401. 38 mg (45% yield) of the title compound could be obtained using the general procedure B as a light yellow solid.

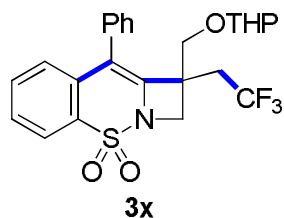

**Compound 3x:** 67 mg, 70% yield (general procedure A), light yellow oil; dr = 1.6:1; Flash column chromatography conditions: petroleum ethers/EtOAc = 20:1; The two isomers can't be separated after flash column chromatography. Data of the major isomer:  $^1\text{H}$  NMR (600 MHz,  $\text{CDCl}_3$ )  $\delta$  8.06 (d,  $J = 7.8$  Hz, 1H), 7.51–7.37 (m, 5H), 7.36–7.27 (m, 2H), 6.94 (d,  $J = 7.8$  Hz, 1H), 4.57 (t,  $J = 3.6$  Hz, 1H), 4.49 (d,  $J = 7.6$  Hz, 1H), 4.40 (d,  $J = 7.6$  Hz, 1H), 3.86 (d,  $J = 10.3$  Hz, 1H), 3.81–3.73 (m, 1H), 3.55–3.48 (m, 1H), 3.42 (d,  $J = 10.3$  Hz, 1H), 2.54–2.39 (m, 1H), 2.39–2.25 (m, 1H), 1.86–1.77 (m, 1H), 1.76–1.47 (m, 5H);  $^{13}\text{C}$  NMR (151 MHz,  $\text{CDCl}_3$ )  $\delta$  146.4, 135.8, 132.5, 132.4, 131.0, 130.2, 128.9, 128.6, 127.2, 126.1, 125.6 (d,  $J = 278.4$  Hz), 123.4, 115.3, 99.3, 68.8, 62.5, 51.3, 46.9, 36.4 (q,  $J = 28.7$  Hz), 30.3, 25.2, 19.2;  $^{19}\text{F}$  NMR (565 MHz,  $\text{CDCl}_3$ )  $\delta$  -60.9. Data of the minor isomer:  $^1\text{H}$  NMR (600 MHz,  $\text{CDCl}_3$ )  $\delta$  8.05 (d,  $J = 7.8$  Hz, 1H), 7.51–7.36 (m, 5H), 7.34–7.27 (m, 2H), 6.94 (d,  $J = 7.8$  Hz, 1H), 4.59 (t,  $J = 3.5$  Hz, 1H), 4.53 (d,  $J = 7.8$  Hz, 1H),

4.33 (d,  $J = 7.8$  Hz, 1H), 3.96 (d,  $J = 10.3$  Hz, 1H), 3.81–3.72 (m, 1H), 3.55–3.49 (m, 1H), 3.46 (d,  $J = 10.3$  Hz, 1H), 2.53–2.39 (m, 1H), 2.39–2.24 (m, 1H), 1.76–1.46 (m, 6H);  $^{13}\text{C}$  NMR (151 MHz,  $\text{CDCl}_3$ )  $\delta$  146.4, 135.8, 132.5, 132.5, 131.0, 130.7, 128.9, 128.6, 127.2, 126.2, 125.7 (d,  $J = 278.2$  Hz), 123.4, 115.4, 99.4, 69.7, 62.3, 51.3, 46.8, 36.3 (q,  $J = 28.4$  Hz), 30.1, 25.2, 19.2;  $^{19}\text{F}$  NMR (565 MHz,  $\text{CDCl}_3$ )  $\delta$  -61.0; HRMS (ESI) Calcd for  $\text{C}_{24}\text{H}_{25}\text{F}_3\text{NO}_4\text{S}$   $[\text{M} + \text{H}]^+$  480.1451, found 480.1502. 71 mg (74% yield) of the title compound could be obtained using the general procedure B as a light yellow oil.

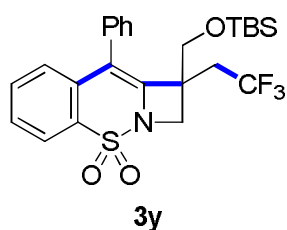

*Compound 3y*: 75 mg, 74% yield (general procedure A), white solid, mp 104-106 °C; Flash column chromatography conditions: petroleum ethers/EtOAc = 20:1;  $^1\text{H}$  NMR (600 MHz,  $\text{CDCl}_3$ )  $\delta$  8.05 (d,  $J = 7.8$  Hz, 1H), 7.50–7.39 (m, 5H), 7.31 (m, 2H), 6.93 (d,  $J = 7.1$  Hz, 1H), 4.49 (d,  $J = 7.7$  Hz, 1H), 4.29 (d,  $J = 7.7$  Hz, 1H), 3.75 (d,  $J = 10.4$  Hz, 1H), 3.61 (d,  $J = 10.4$  Hz, 1H), 2.39–2.25 (m, 2H), 0.86 (s, 9H), 0.05 (d,  $J = 8.9$  Hz, 6H);  $^{13}\text{C}$  NMR (151 MHz,  $\text{CDCl}_3$ )  $\delta$  146.3, 135.7, 132.5, 130.9, 130.5, 130.2, 128.9, 128.6, 127.2, 126.0, 125.7 (q,  $J = 278.2$  Hz), 123.4, 115.2, 65.4, 51.1, 48.4, 35.9 (q,  $J = 28.7$  Hz), 25.7, 18.2, -5.6 (d,  $J = 12.3$  Hz);  $^{19}\text{F}$  NMR (565 MHz,  $\text{CDCl}_3$ )  $\delta$  -60.9; HRMS (ESI) Calcd for  $\text{C}_{25}\text{H}_{31}\text{F}_3\text{NO}_3\text{SSi}$   $[\text{M} + \text{H}]^+$  510.1741, found 510.1743. 66 mg (65% yield) of the title compound could be obtained using the general procedure B as a white solid.

# NMR spectra

8.0708  
8.0577  
7.5342  
7.5323  
7.5212  
7.5086  
7.5066  
7.4856  
7.4741  
7.4640  
7.4615  
7.4531  
7.4444  
7.4419  
7.4365  
7.4325  
7.4278  
7.3174  
7.3149  
7.3035  
7.2999  
7.1587  
7.1454  
4.4382  
4.4255  
4.4169  
4.3942  
4.3825  
4.3698  
3.9707  
3.9655  
3.9583  
3.9544  
3.9507  
3.9457  
3.9418  
3.9383  
3.9310  
3.9258  
2.3629  
2.3462  
2.3425  
2.3379  
2.3258  
2.3212  
2.3176  
2.3009  
2.0437  
2.0393  
2.0320  
2.0264  
2.0208  
2.0144  
2.0085  
2.0017  
1.9965

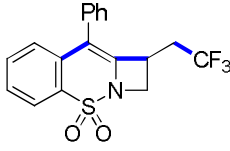

**3a**

<sup>1</sup>H NMR (600 MHz, CDCl<sub>3</sub>)

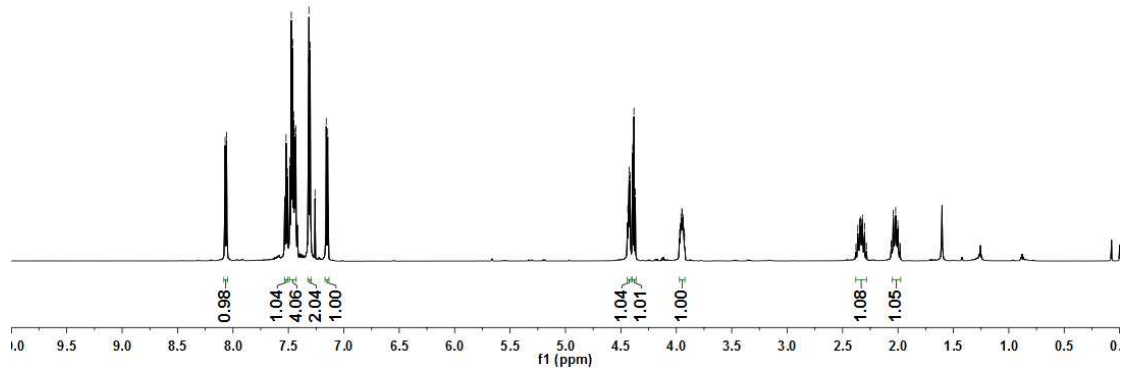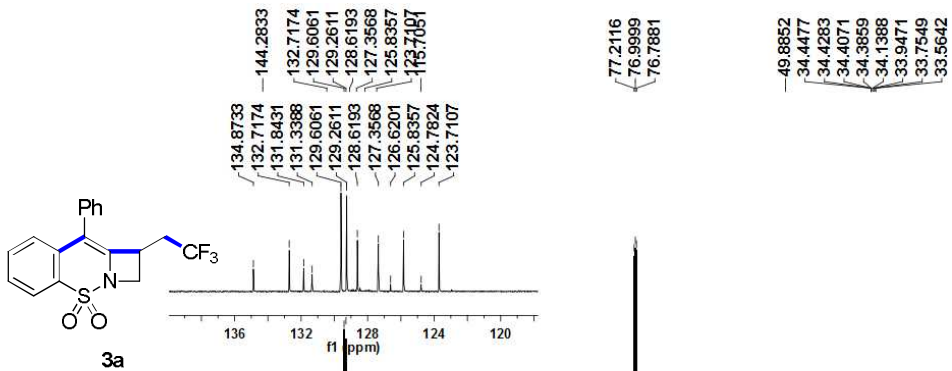

<sup>13</sup>C NMR (151 MHz, CDCl<sub>3</sub>)

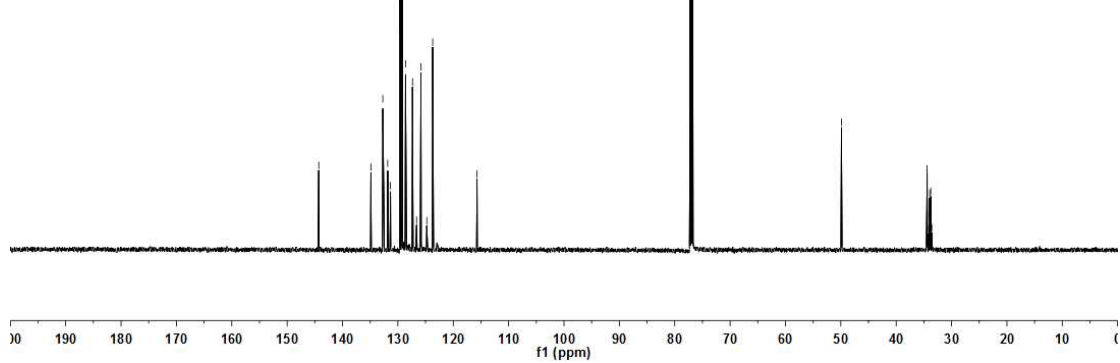

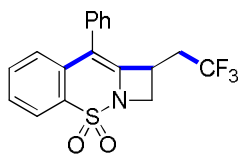

**3a**

$^{19}\text{F}$  NMR (565 MHz,  $\text{CDCl}_3$ )

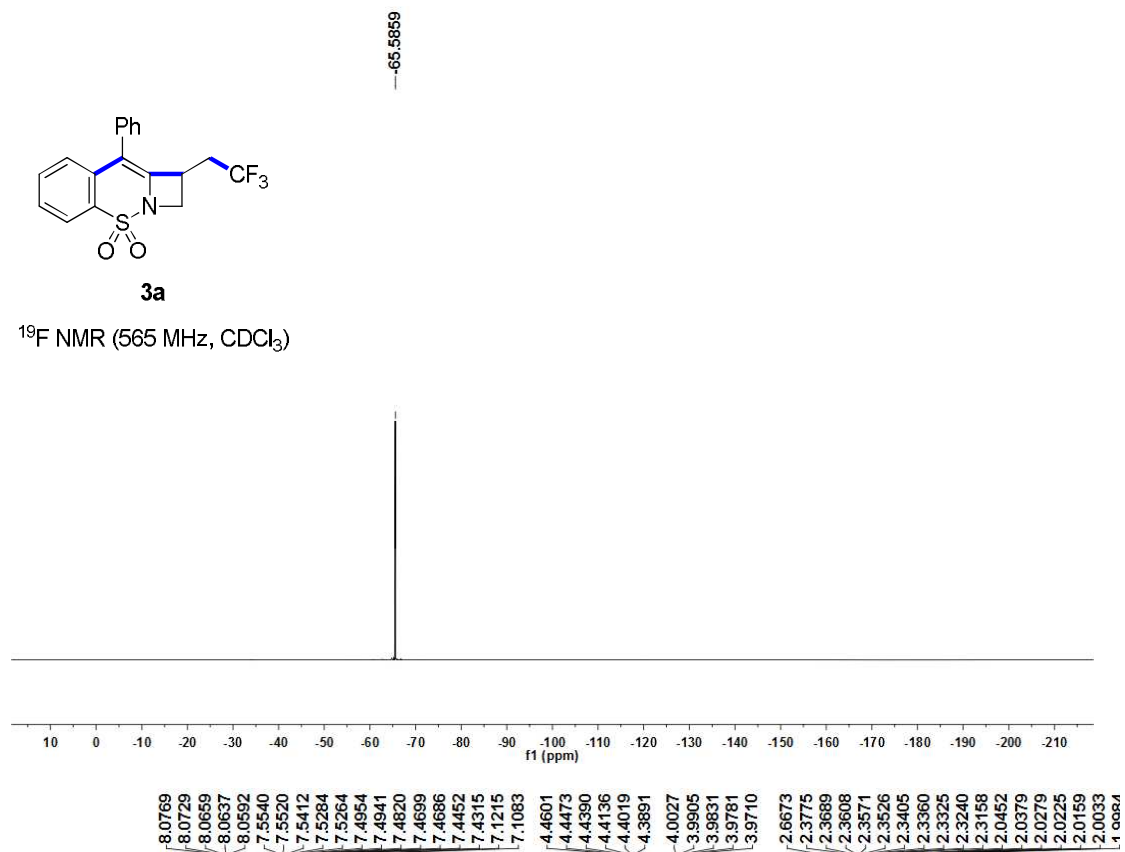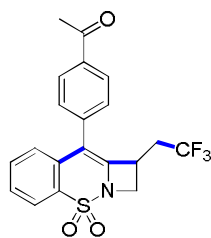

**3b**

$^1\text{H}$  NMR (600 MHz,  $\text{CDCl}_3$ )

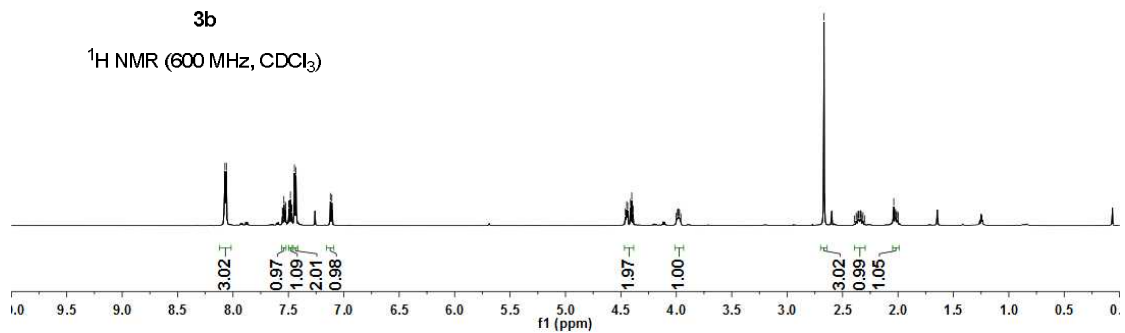

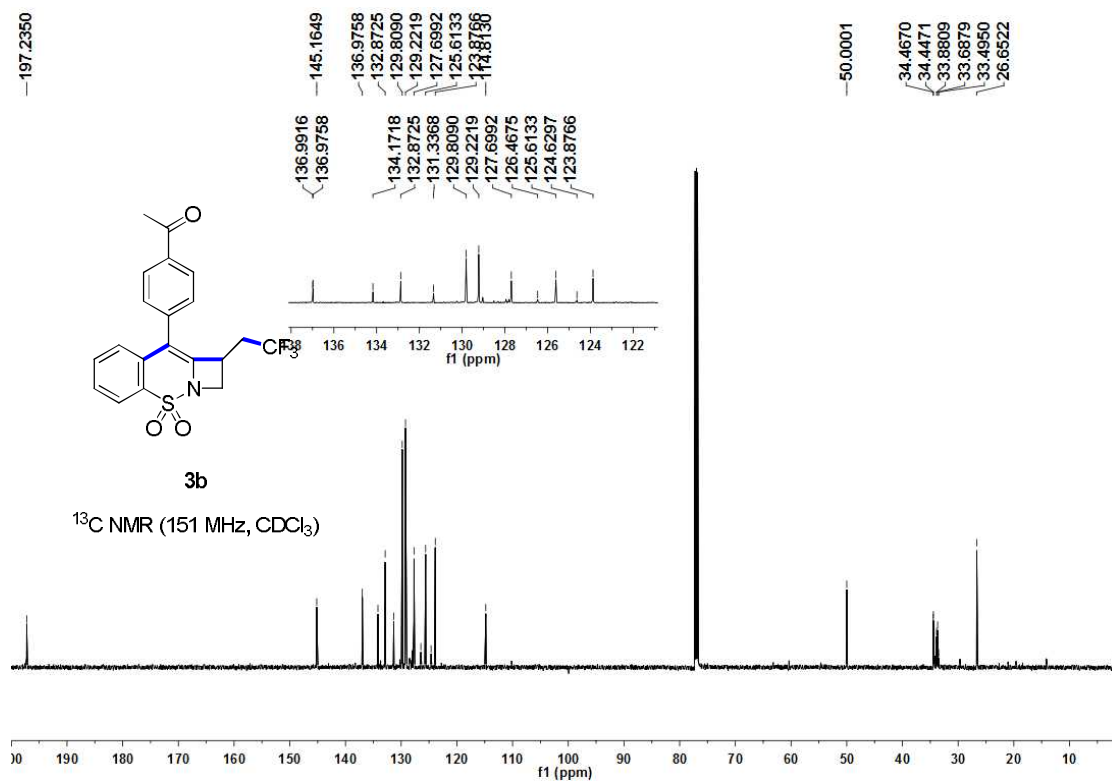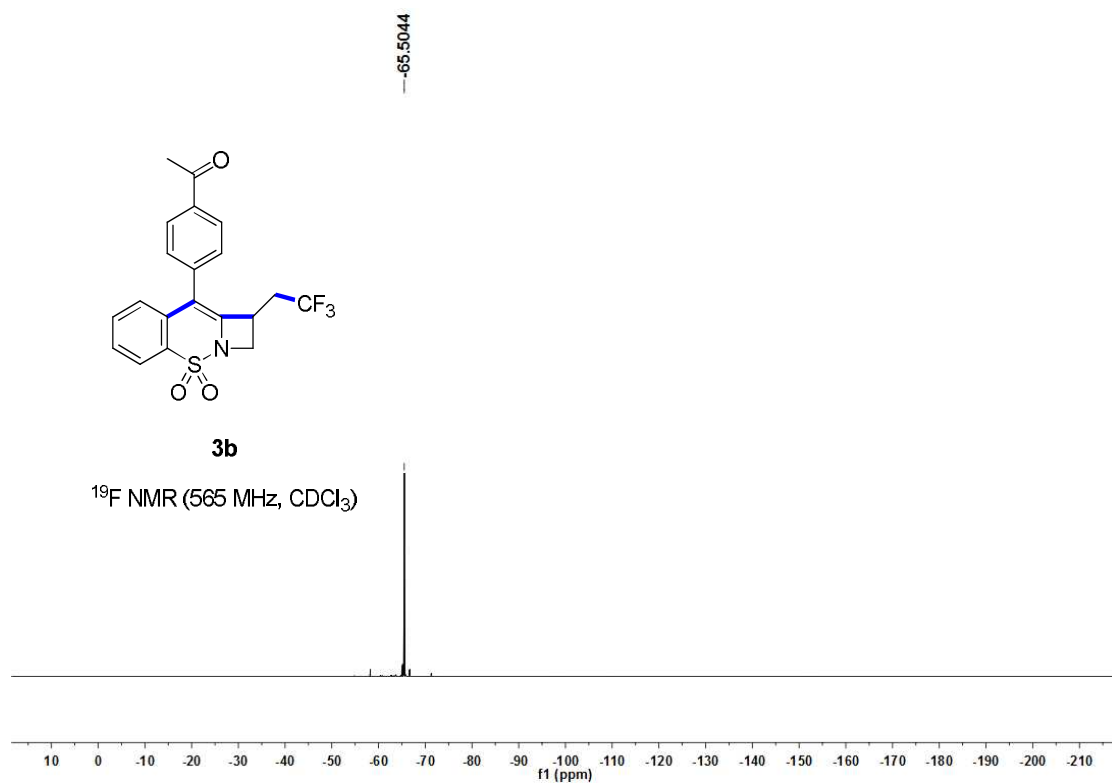

8.1584  
8.1448  
8.0766  
8.0637  
7.5468  
7.5349  
7.5225  
7.4888  
7.4762  
7.4638  
7.4132  
7.3996  
7.2897  
7.1199  
7.1067  
4.4567  
4.4419  
4.4352  
4.4297  
4.4177  
4.4067  
4.3963  
4.3837  
3.9856  
3.9836  
3.9762  
3.9712  
3.9641  
3.8681  
2.3897  
2.3513  
2.3478  
2.3434  
2.3311  
2.3267  
2.3147  
2.3066  
2.0379  
2.0333  
2.0203  
2.0149  
2.0087  
1.9960  
1.9911

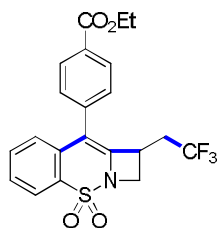

**3c**

<sup>1</sup>H NMR (600 MHz, CDCl<sub>3</sub>)

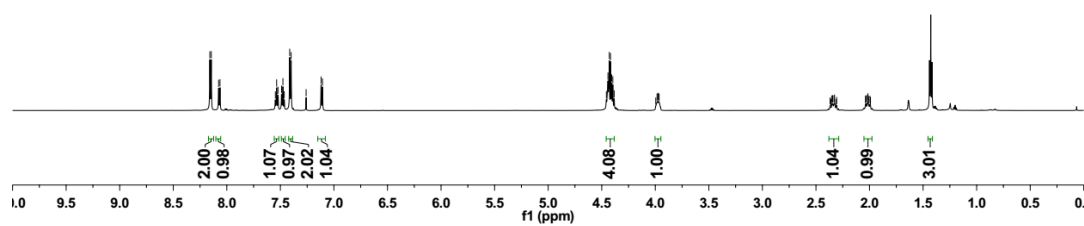

165.8960  
145.0679  
136.6657  
134.2503  
132.8576  
131.3406  
130.6863  
130.4543  
129.5666  
127.6512  
125.6369  
123.8566  
122.9133  
121.9133  
61.3114  
49.9911  
34.4681  
34.4473  
34.0578  
33.8641  
33.6722  
33.4794  
14.3110

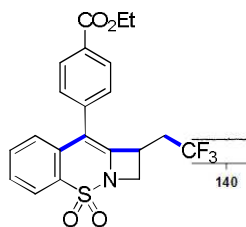

**3c**

<sup>13</sup>C NMR (151 MHz, CDCl<sub>3</sub>)

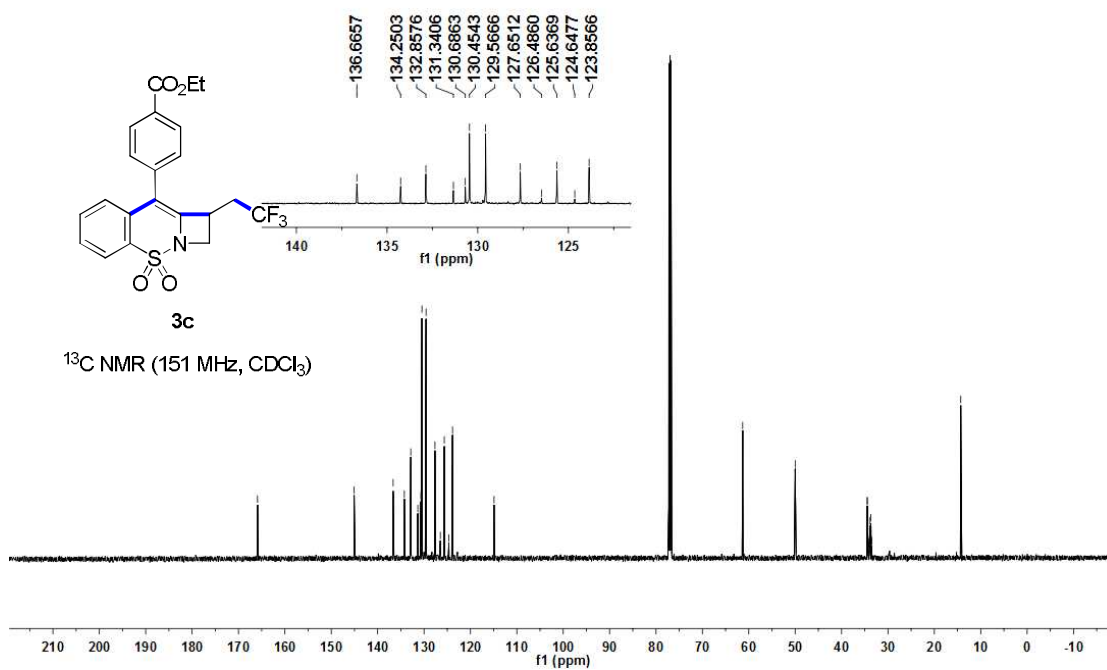



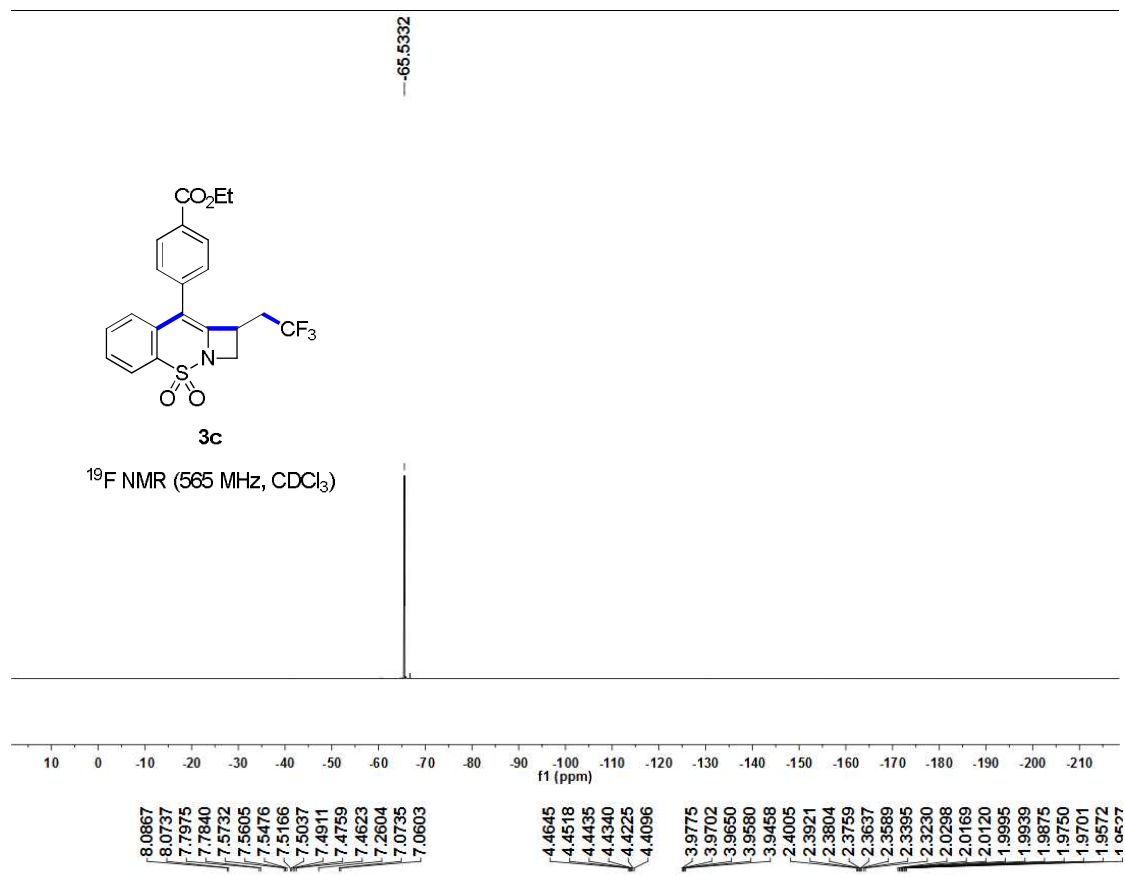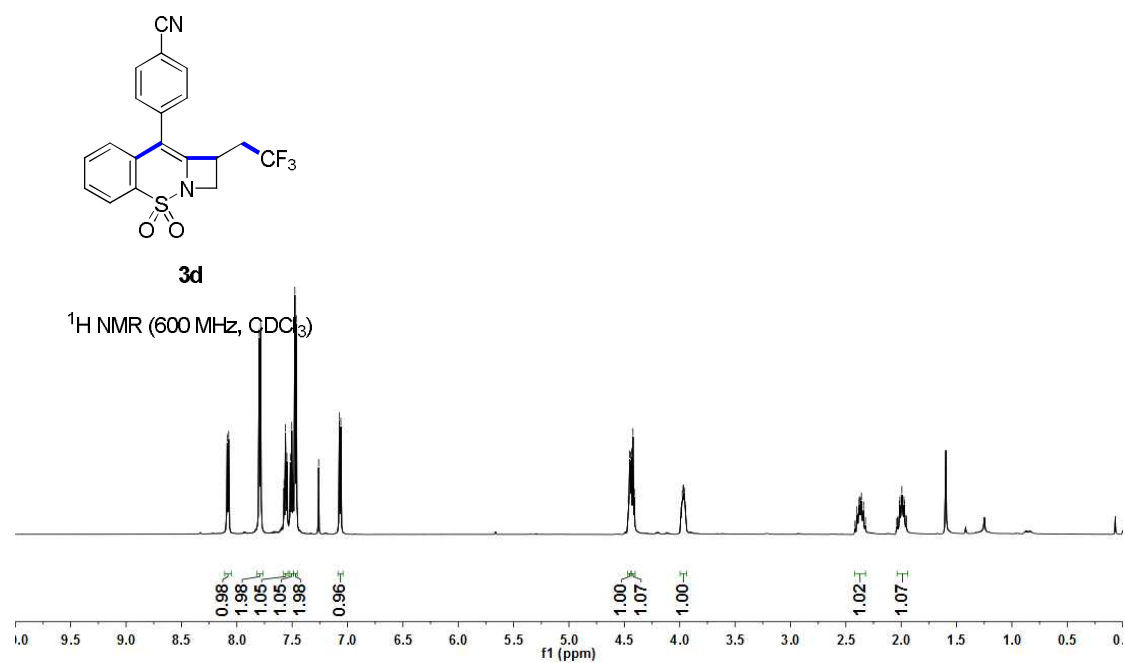

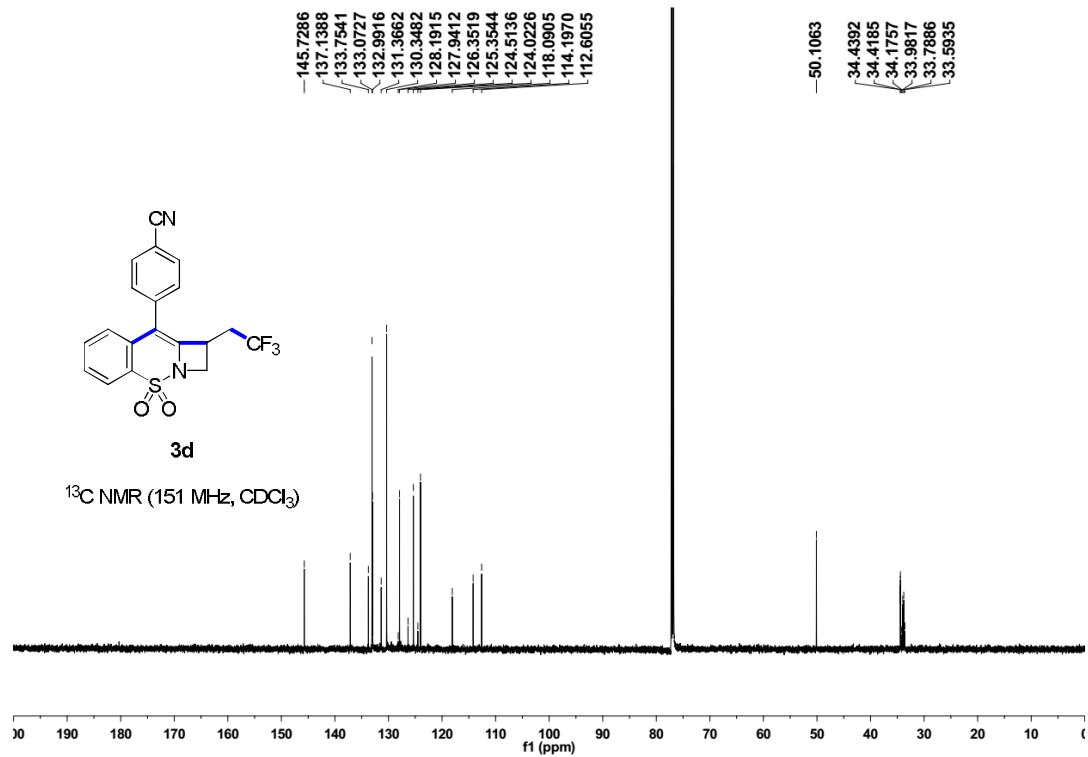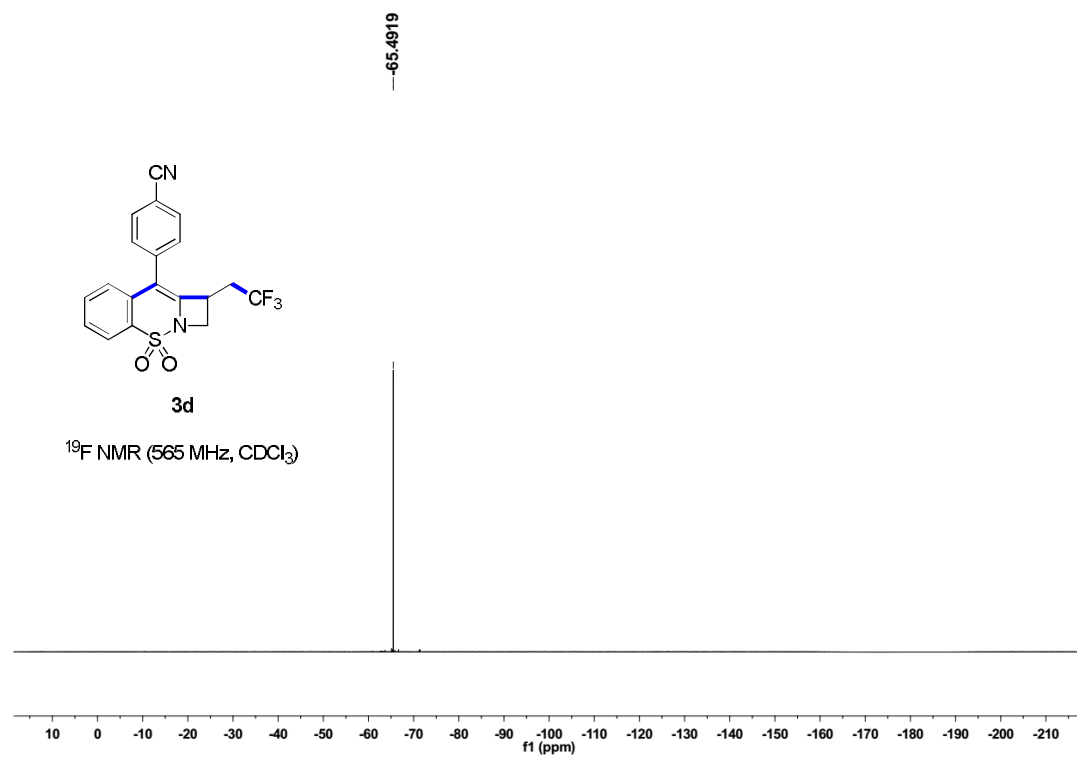

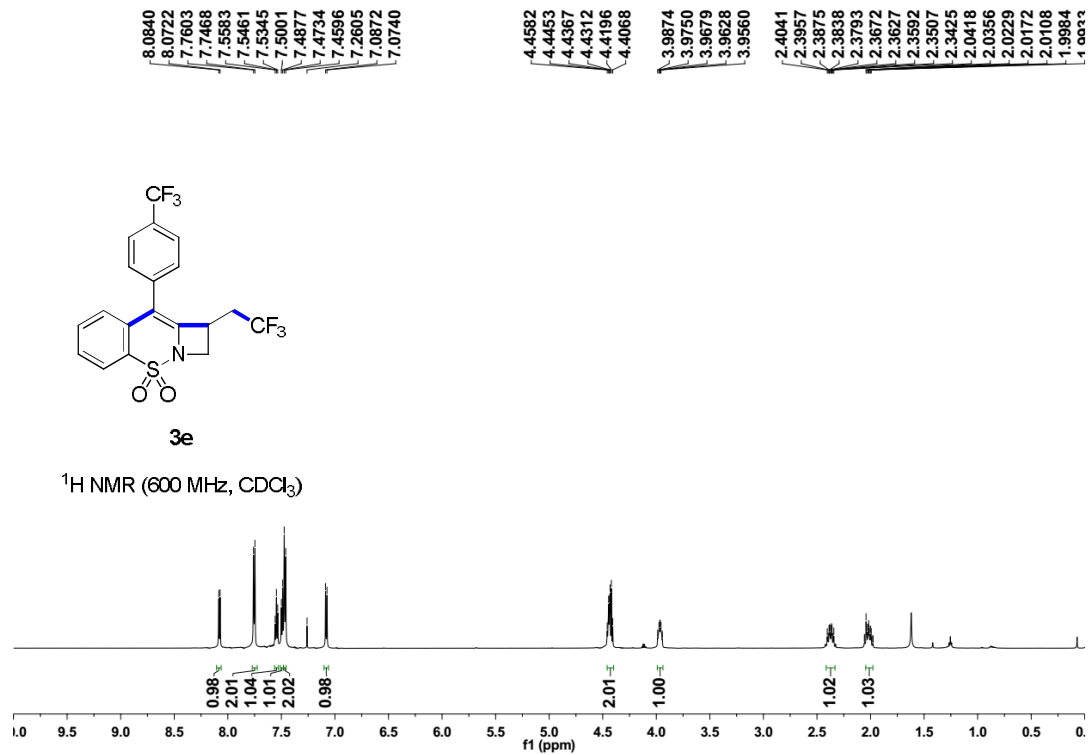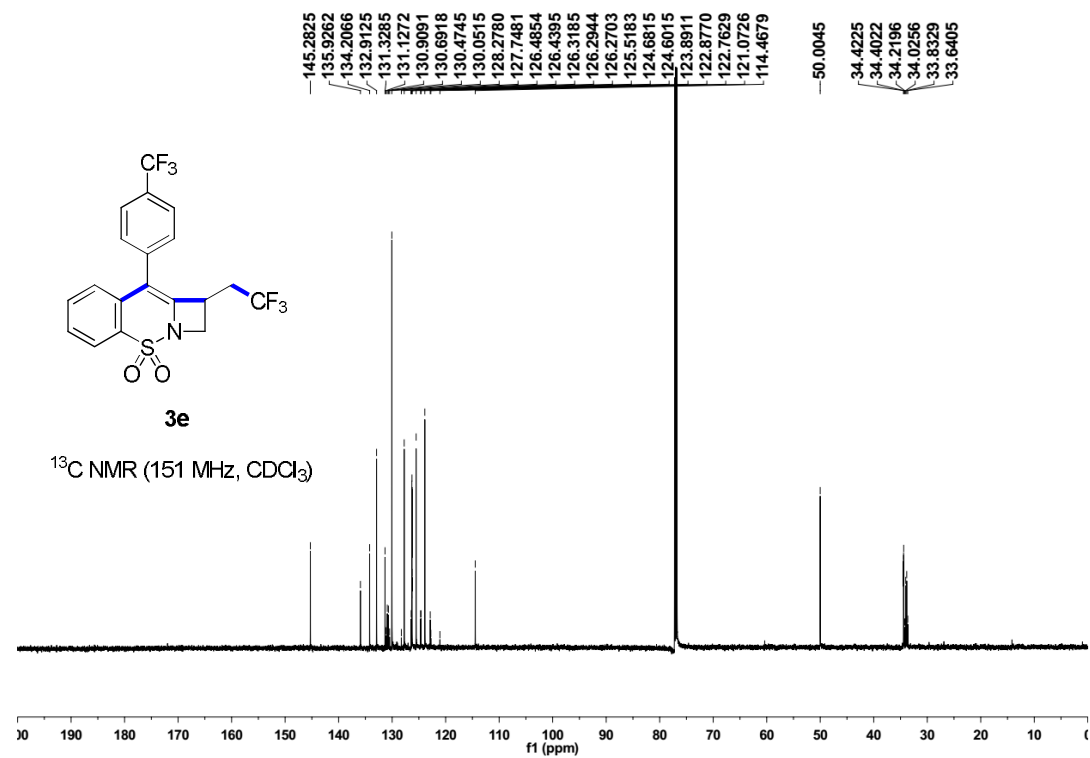

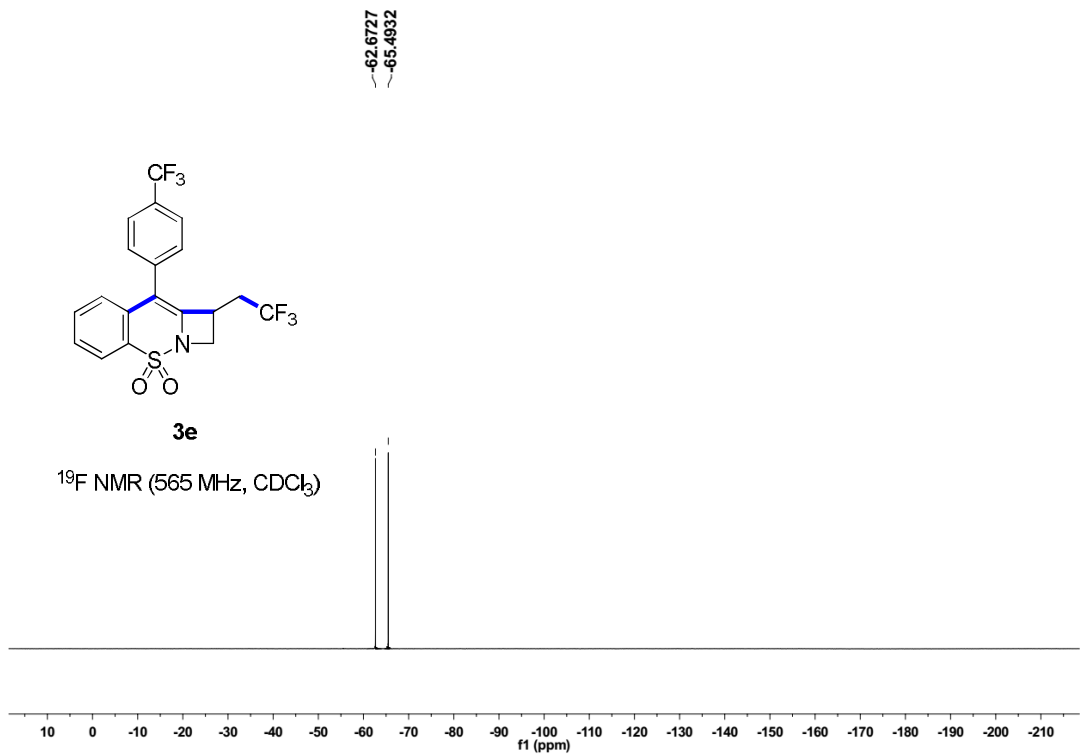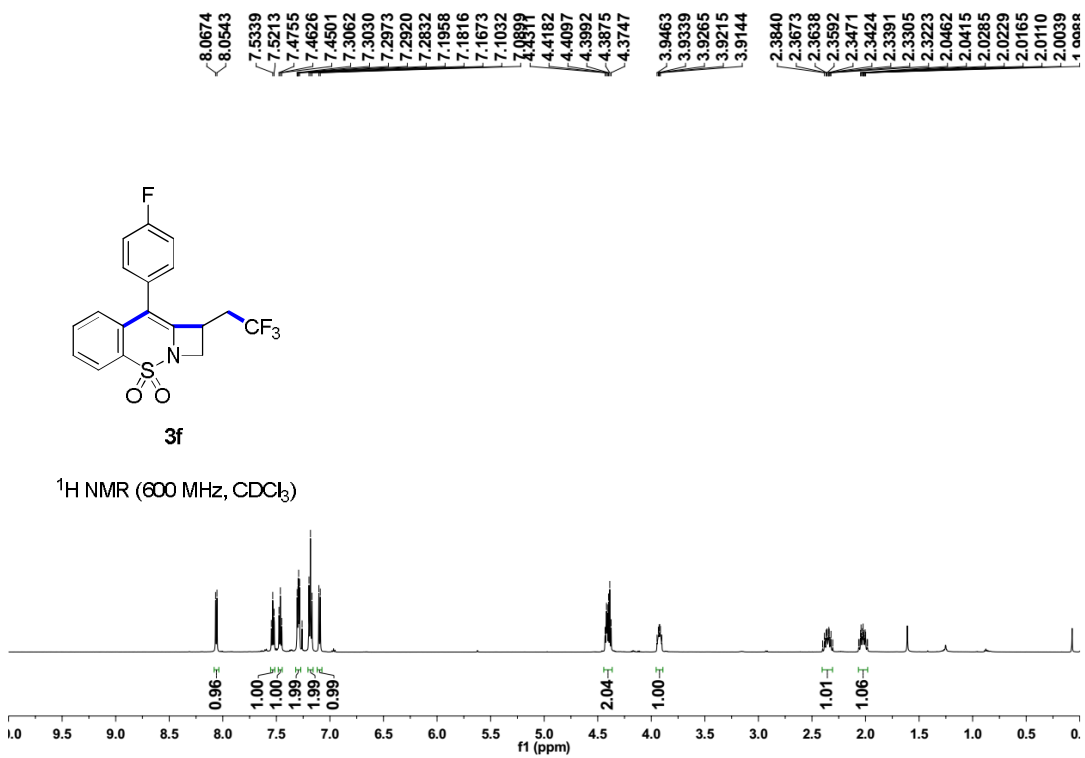

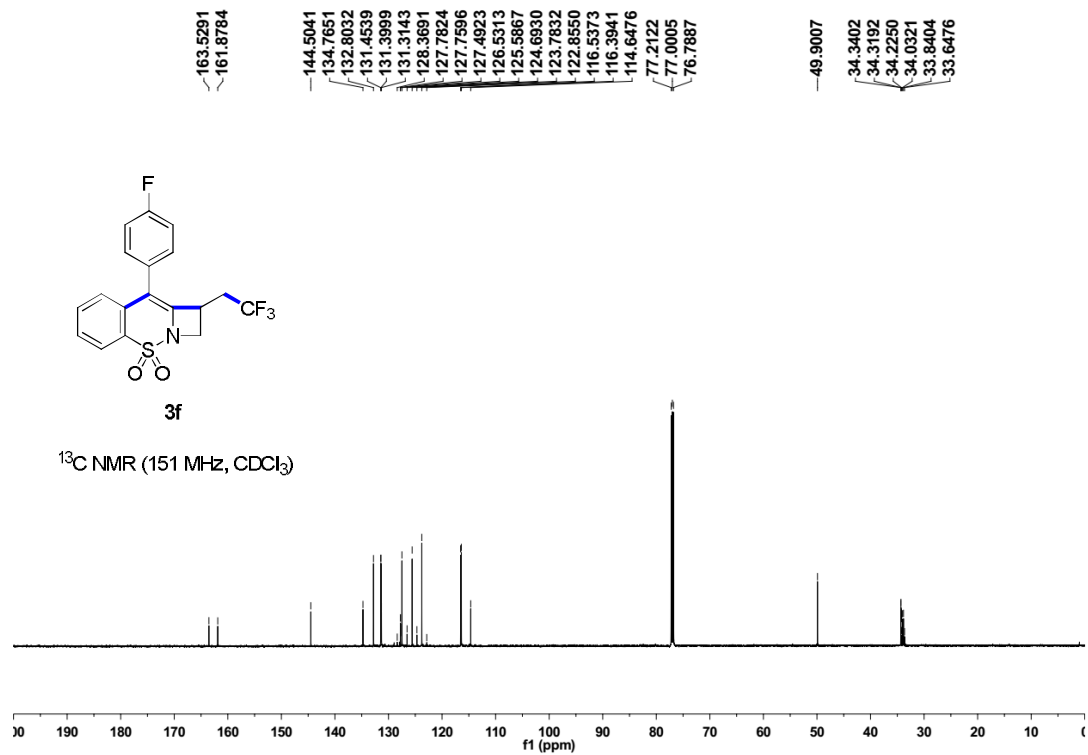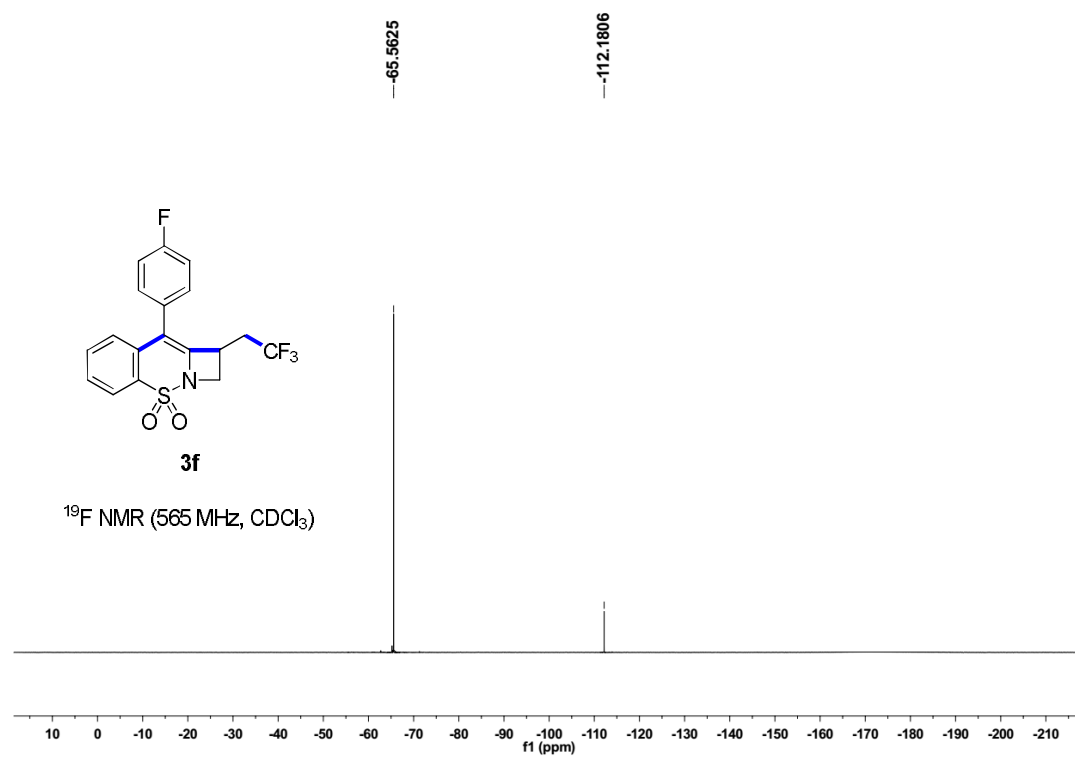

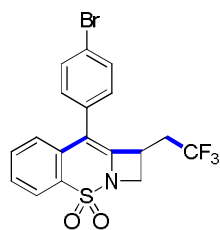

**3g**

$^1\text{H NMR}$  (600 MHz,  $\text{CDCl}_3$ )

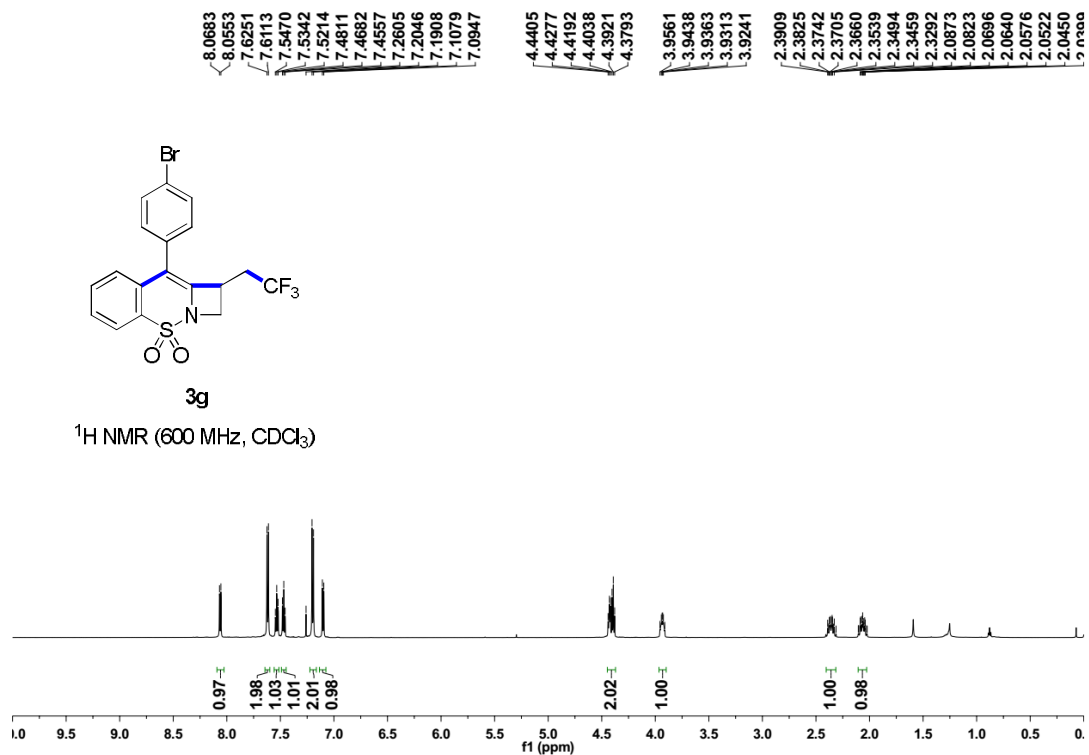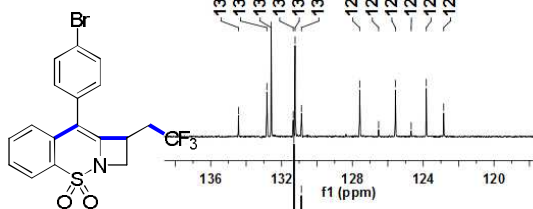

**3g**

$^{13}\text{C NMR}$  (151 MHz,  $\text{CDCl}_3$ )

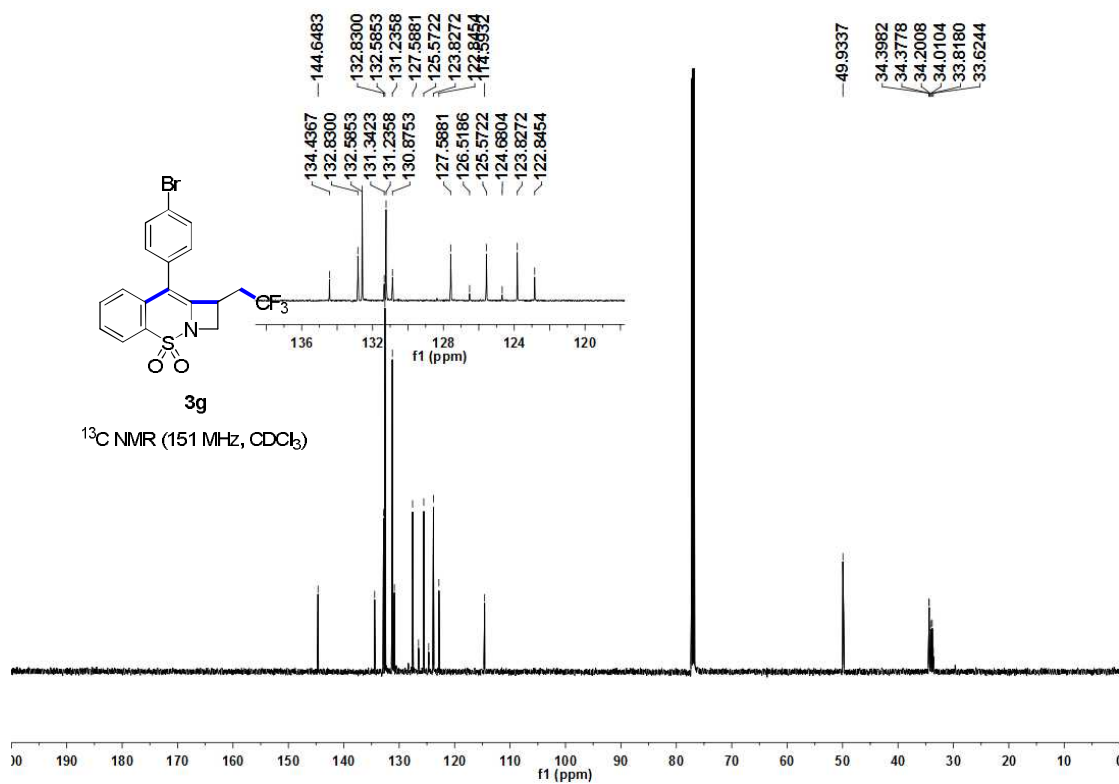

-65.4832

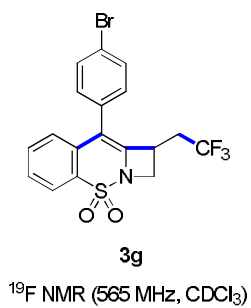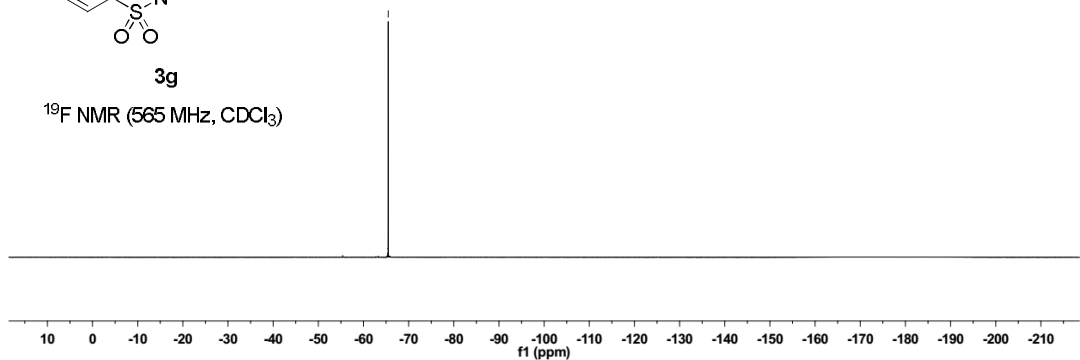

8.0683  
8.0552  
7.5476  
7.5346  
7.5219  
7.4802  
7.4696  
7.4557  
7.2667  
7.2603  
7.2528  
7.1079  
7.0947  
4.4388  
4.4259  
4.4175  
4.4018  
4.3901  
4.3773  
3.9446  
3.9371  
3.9321  
3.9284  
3.9248  
2.3885  
2.3719  
2.3681  
2.3636  
2.3516  
2.3470  
2.3433  
2.3267  
2.0778  
2.0728  
2.0652  
2.0601  
2.0544  
2.0479  
2.0423  
2.0354

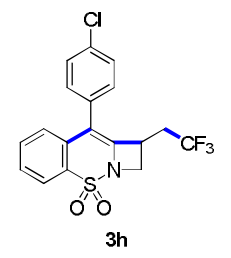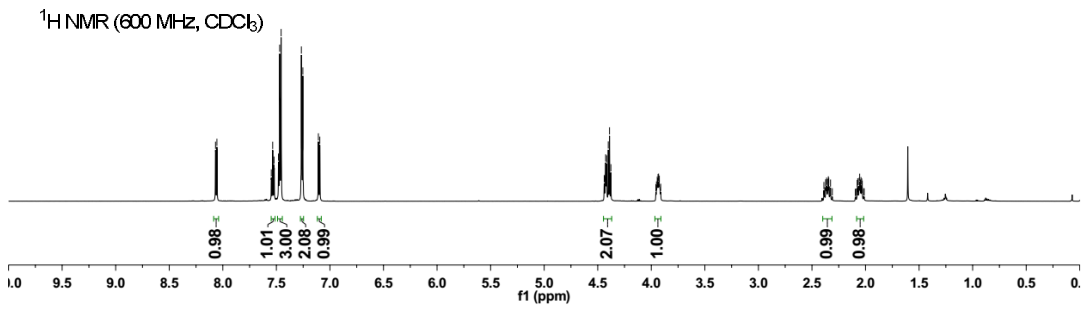

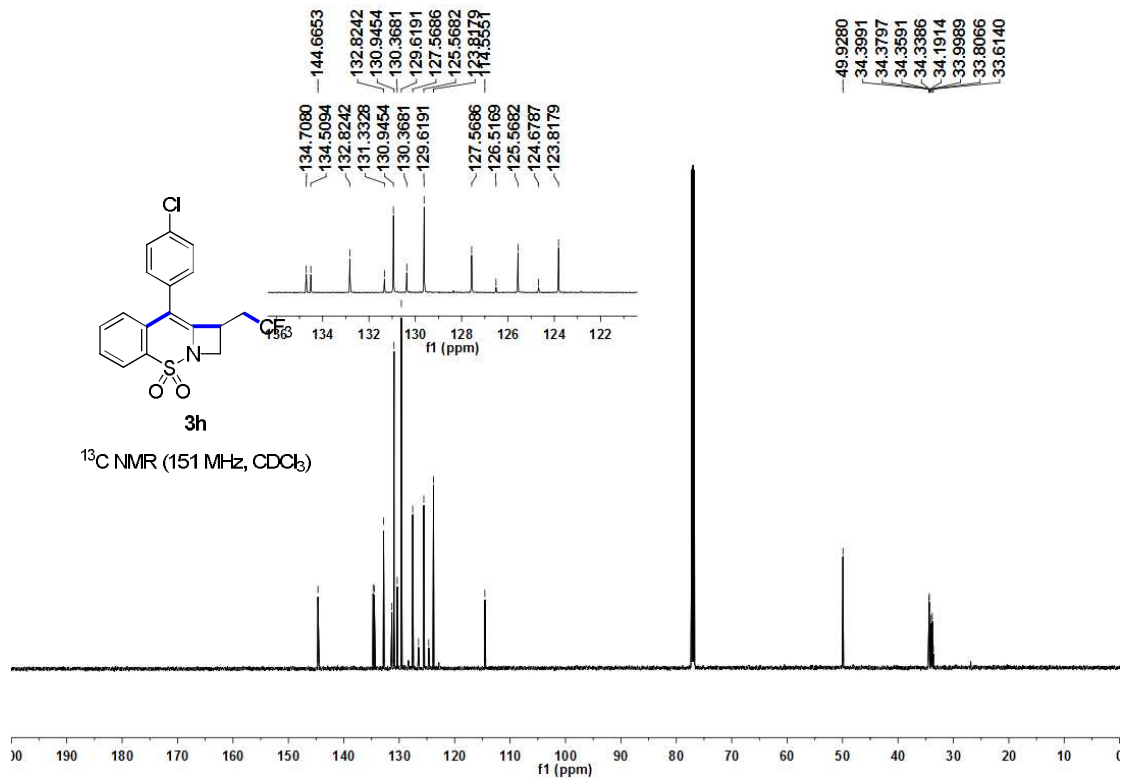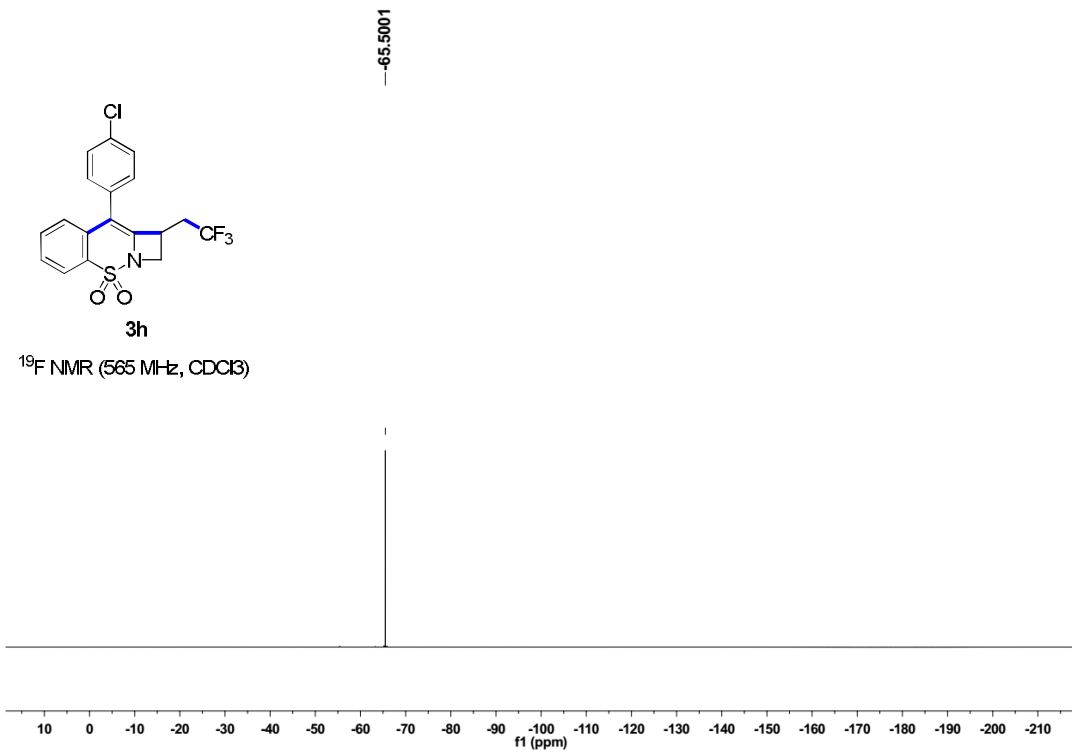



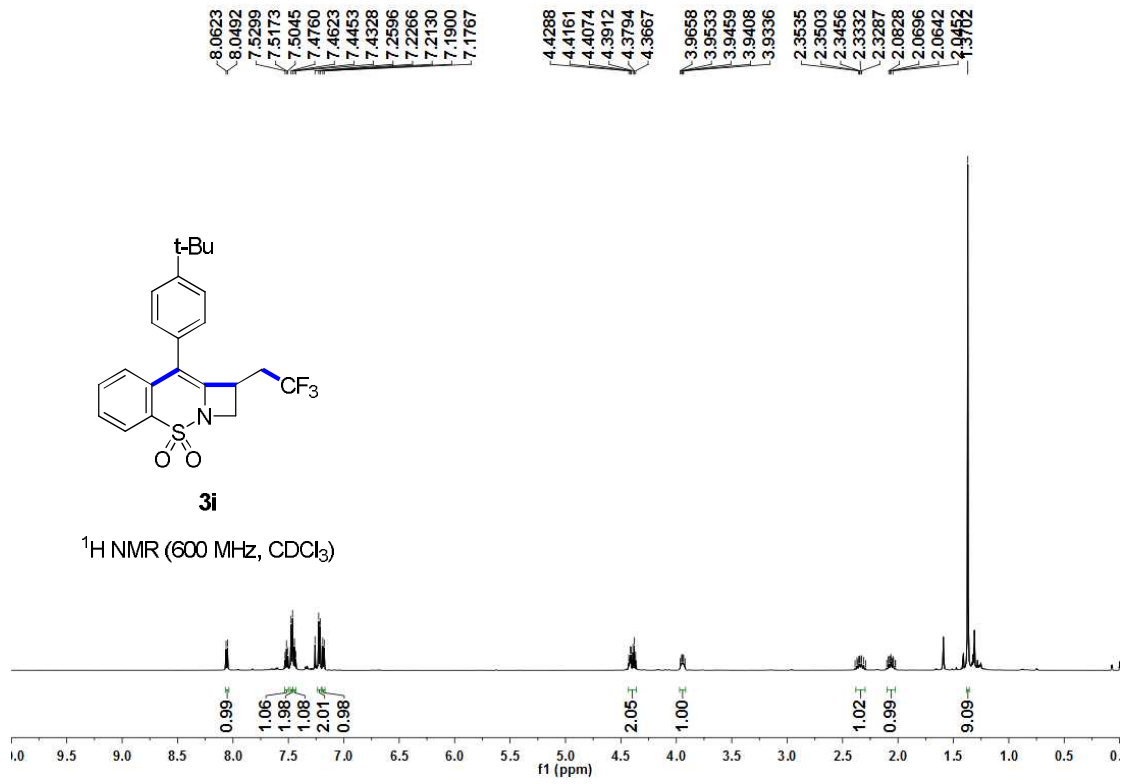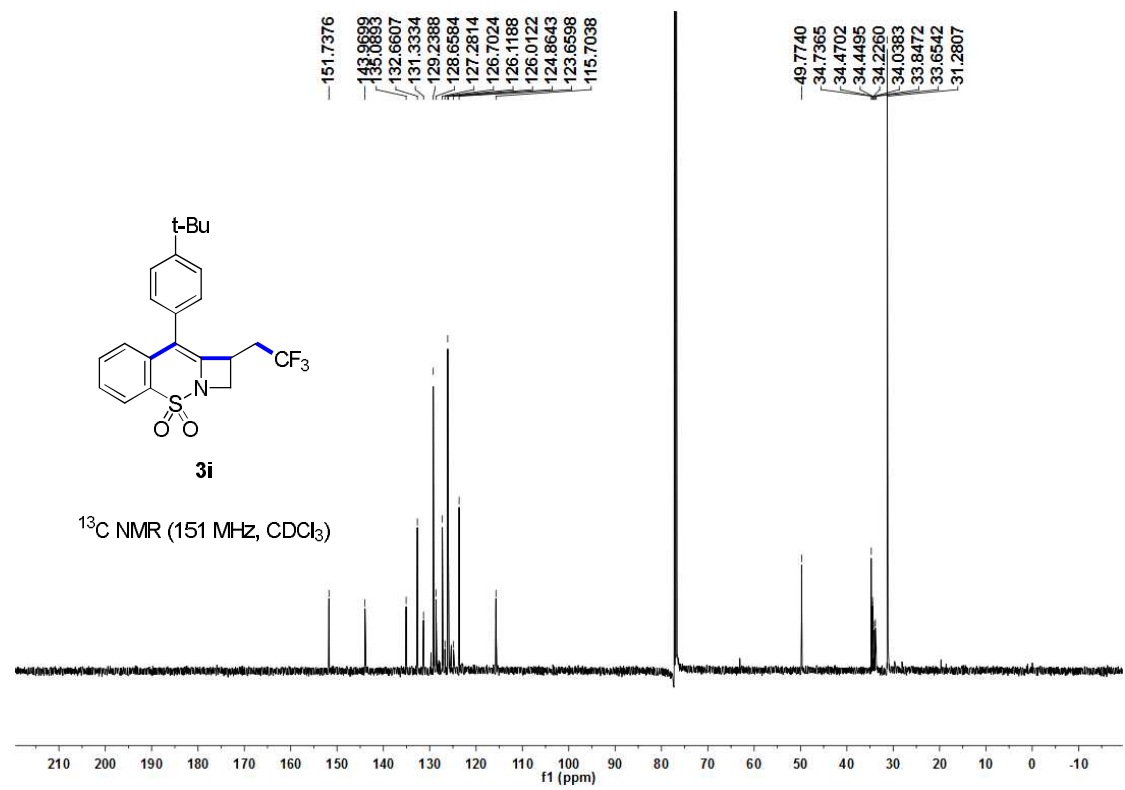

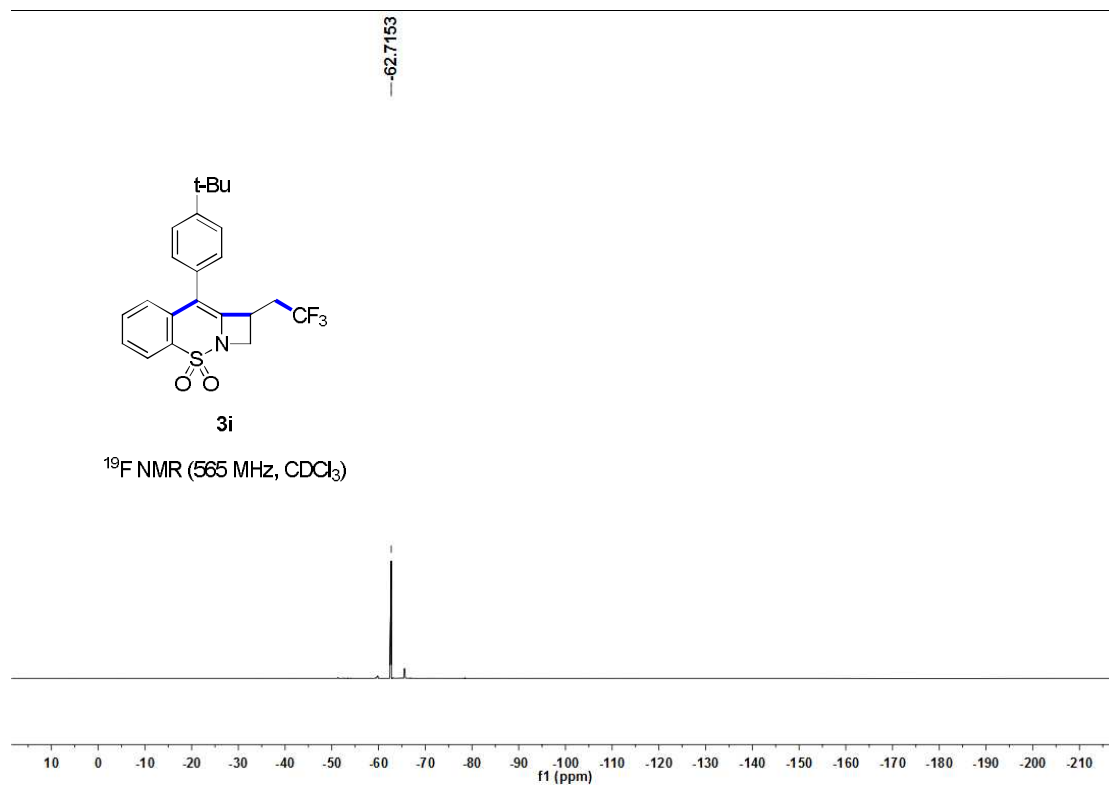

8.0628  
8.0496  
7.5265  
7.5139  
7.5009  
7.4594  
7.4463  
7.4339  
7.2767  
7.2636  
7.1917  
7.1784  
7.1670  
7.1537

4.4321  
4.4195  
4.4108  
4.3841  
4.3723  
4.3595

3.9499  
3.9425  
3.9376  
3.9338  
3.9302

2.4248  
2.3604  
2.3439  
2.3401  
2.3352  
2.3265  
2.3234  
2.3187  
2.3151  
2.2983  
2.0909  
2.0859  
2.0730  
2.0675  
2.0610  
2.0481  
2.0434

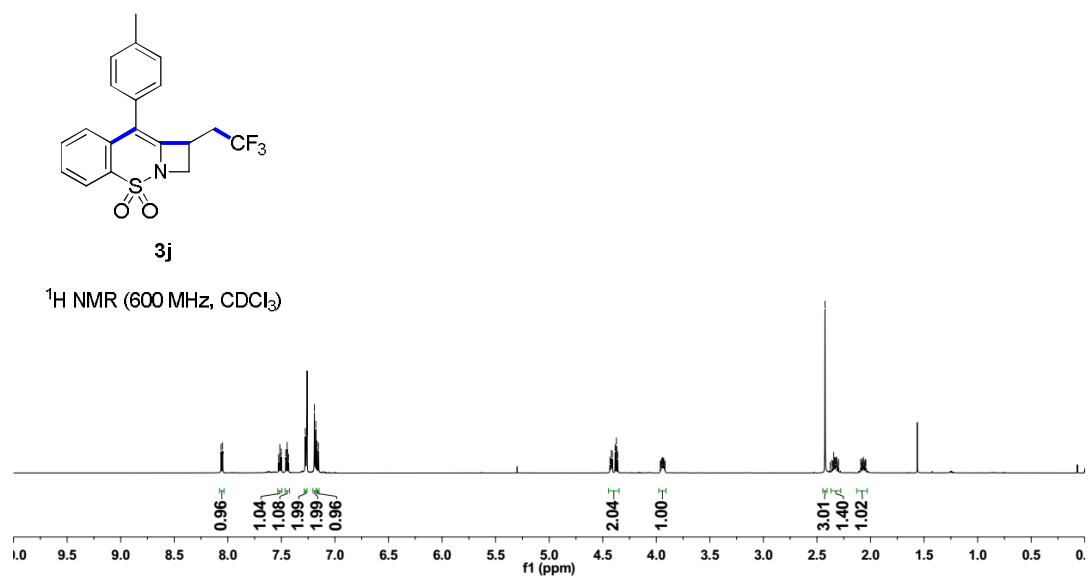

0.96  
1.04  
1.88  
1.99  
1.99  
0.96

2.04  
1.00

3.01  
1.40  
1.02

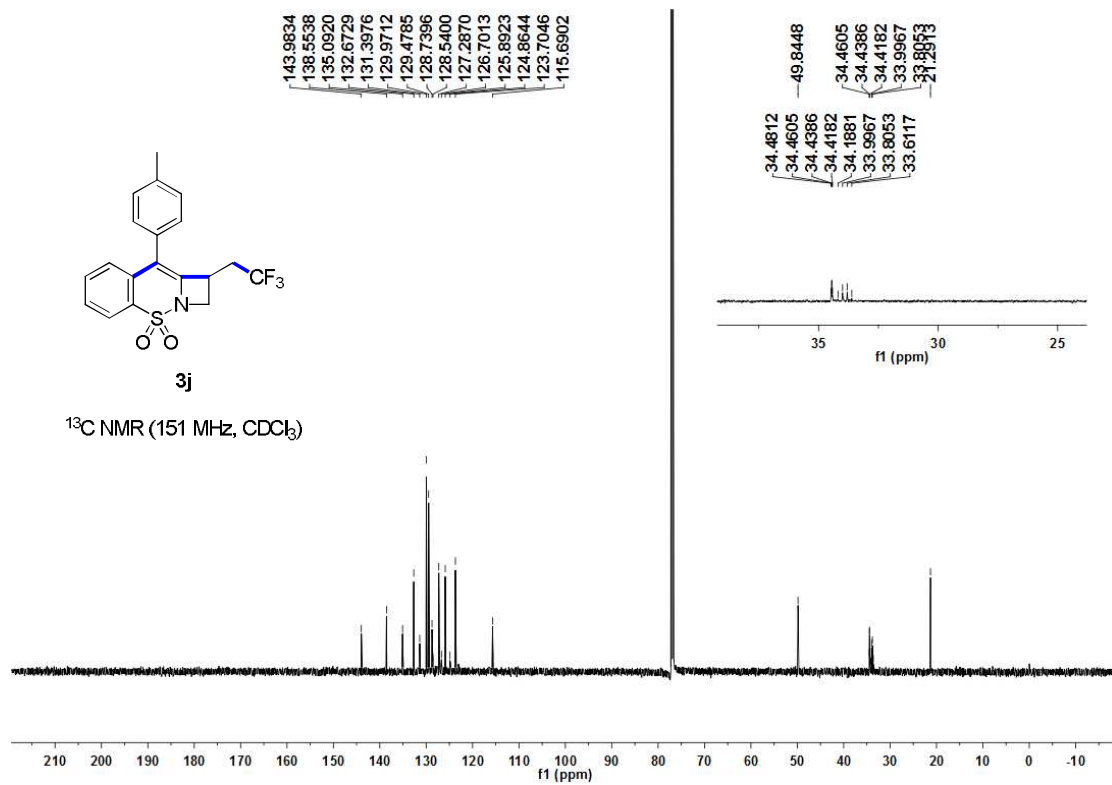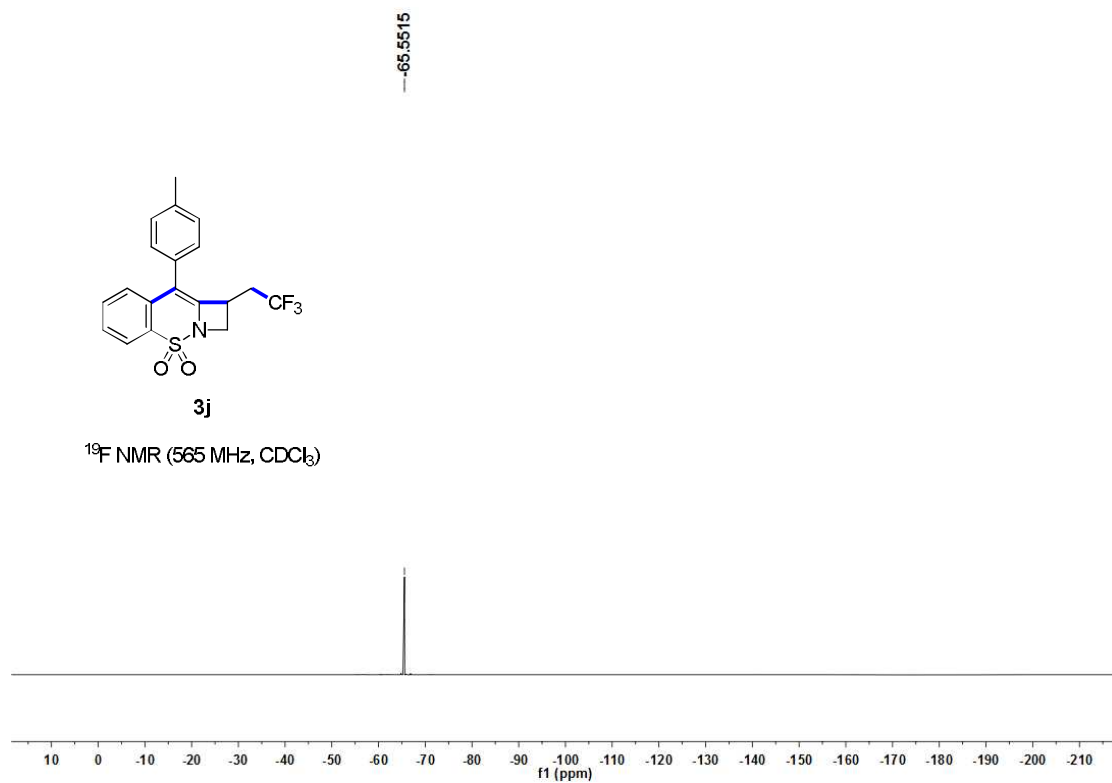

8.0649  
8.0518  
7.5367  
7.5236  
7.5111  
7.4629  
7.4496  
7.4374  
7.3645  
7.3518  
7.3392  
7.2604  
7.2426  
7.2299  
7.1716  
7.1591  
7.1196  
7.1039  
7.0912  
4.4306  
4.4179  
4.4092  
4.3875  
4.3757  
4.3630  
3.9695  
3.9645  
3.9570  
3.9535  
3.9495  
3.9446  
3.9407  
3.9372  
3.9297  
3.9247  
2.3958  
2.3827  
2.3655  
2.3573  
2.3488  
2.3411  
2.3321  
2.3285  
2.3237  
2.3204  
2.3095  
2.3035  
2.2994  
2.0709  
2.0660  
2.0529  
2.0474  
2.0411  
2.0350  
2.0281  
2.0231

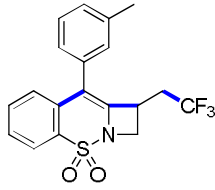

**3k**

$^1\text{H NMR}$  (600 MHz,  $\text{CDCl}_3$ )

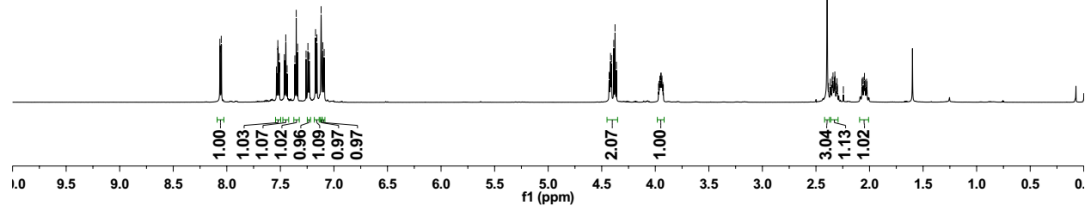

144.0900  
139.0367  
134.9707  
132.6937  
131.7202  
131.3392  
130.1731  
129.3486  
129.1110  
127.2948  
126.6723  
126.6252  
125.9362  
124.8346  
123.6721  
115.8406

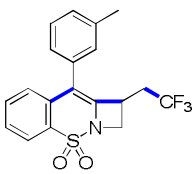

**3k**

$^{13}\text{C NMR}$  (151 MHz,  $\text{CDCl}_3$ )

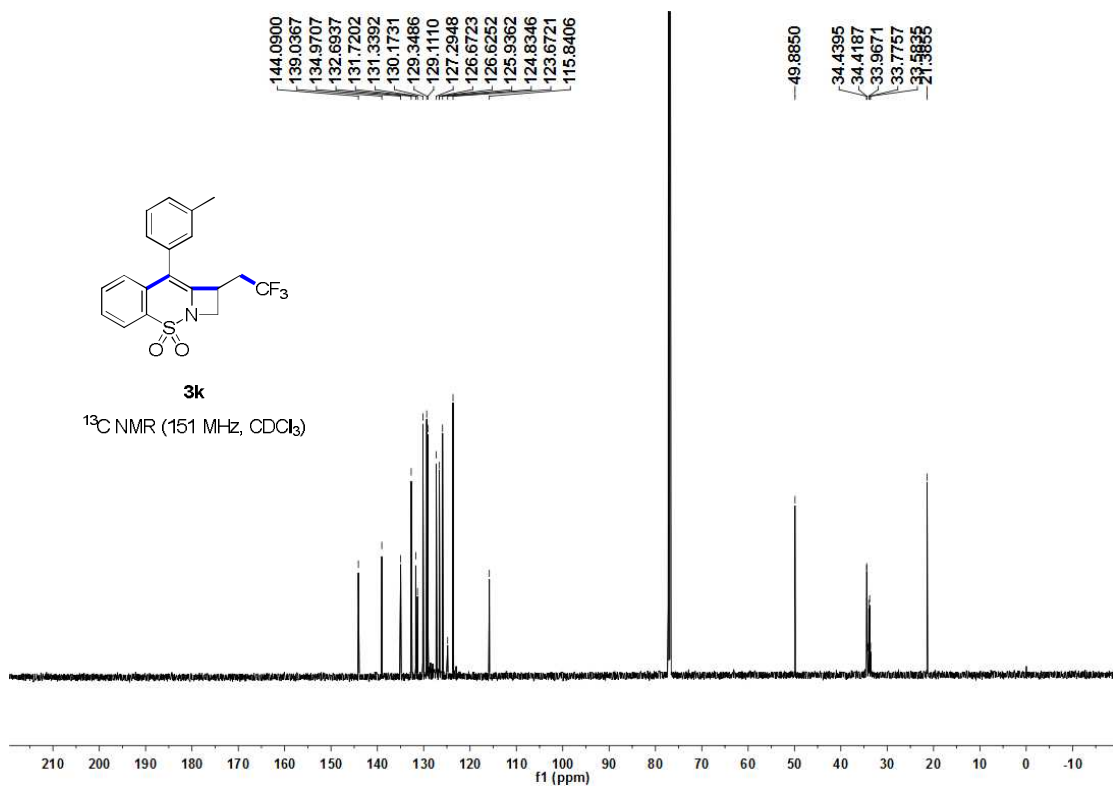

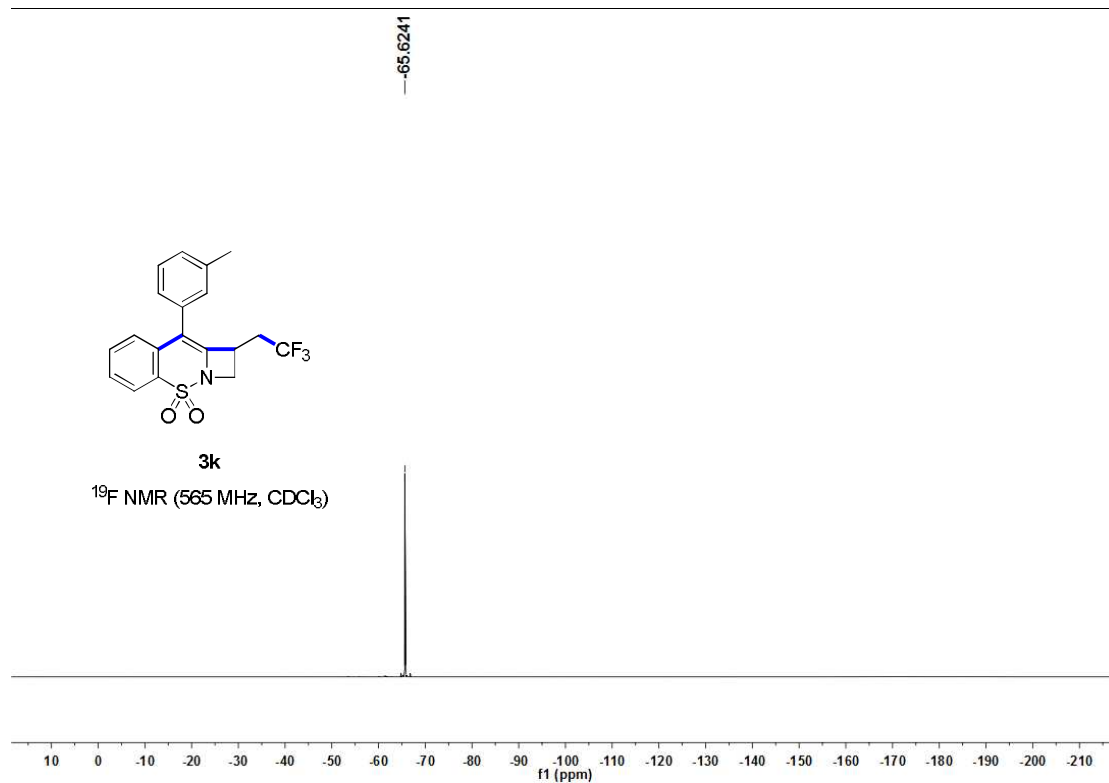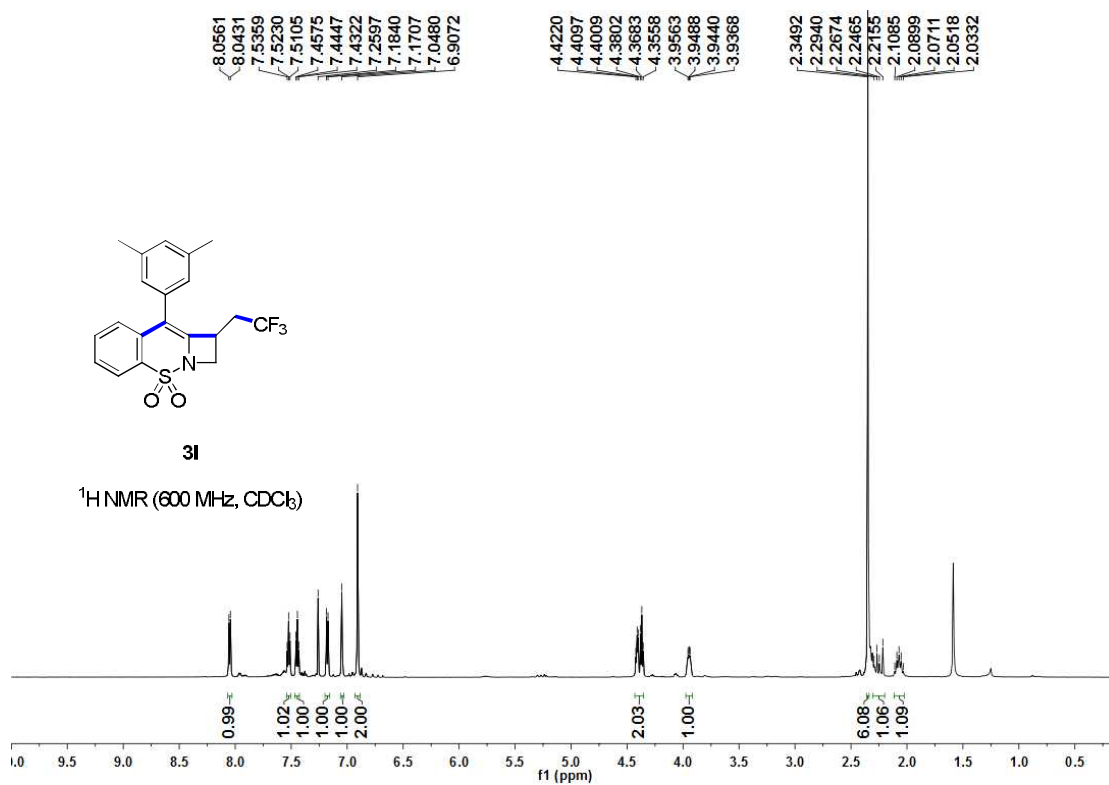

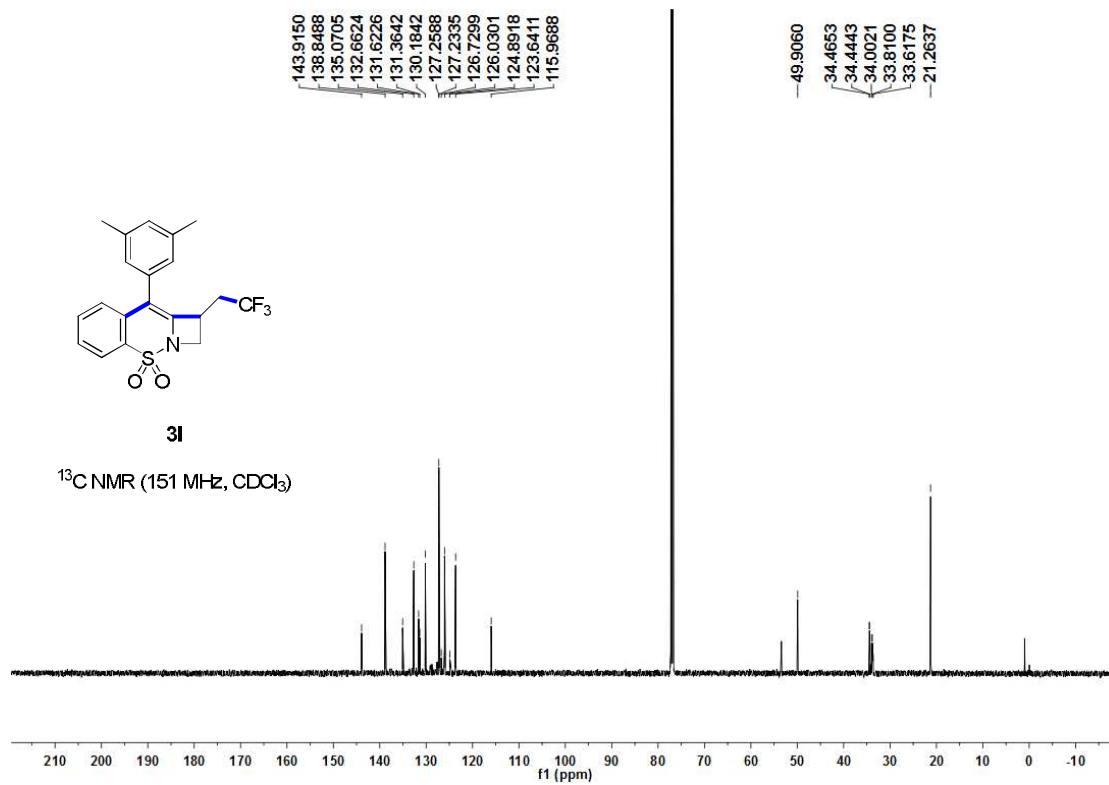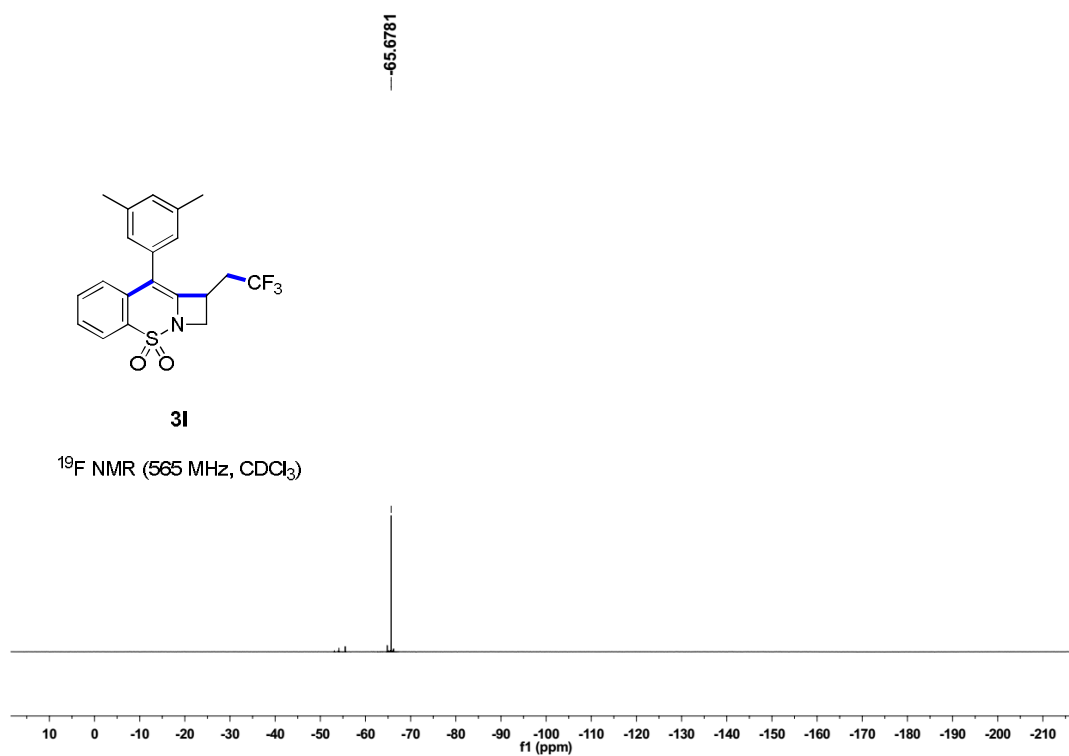

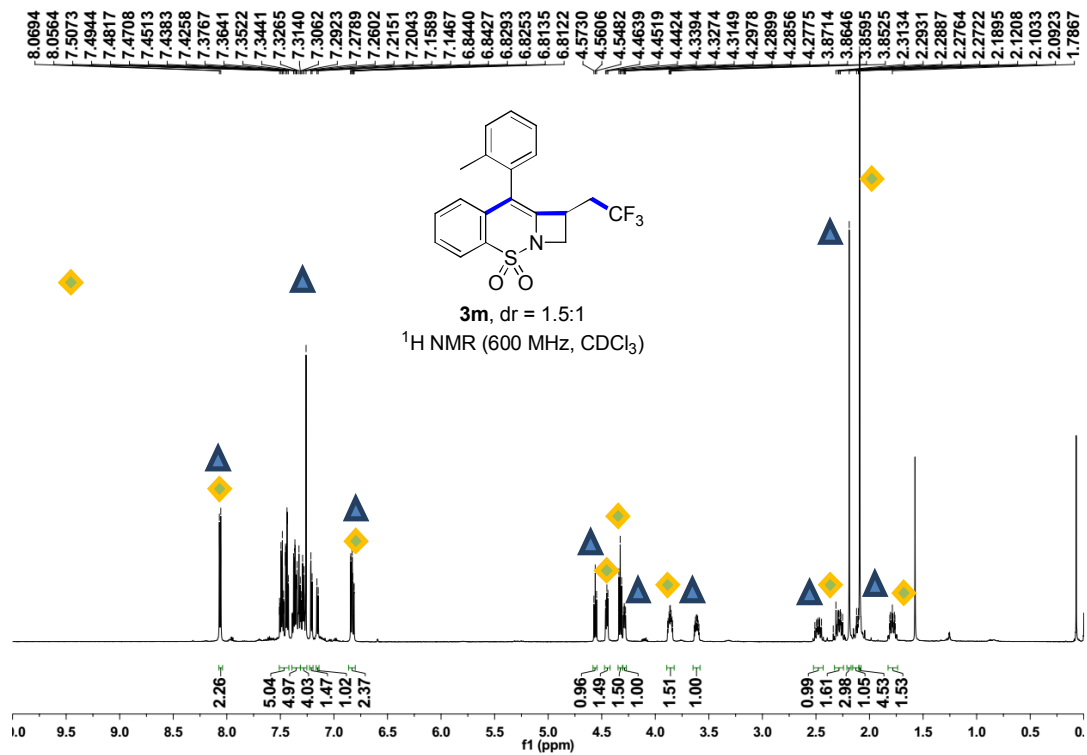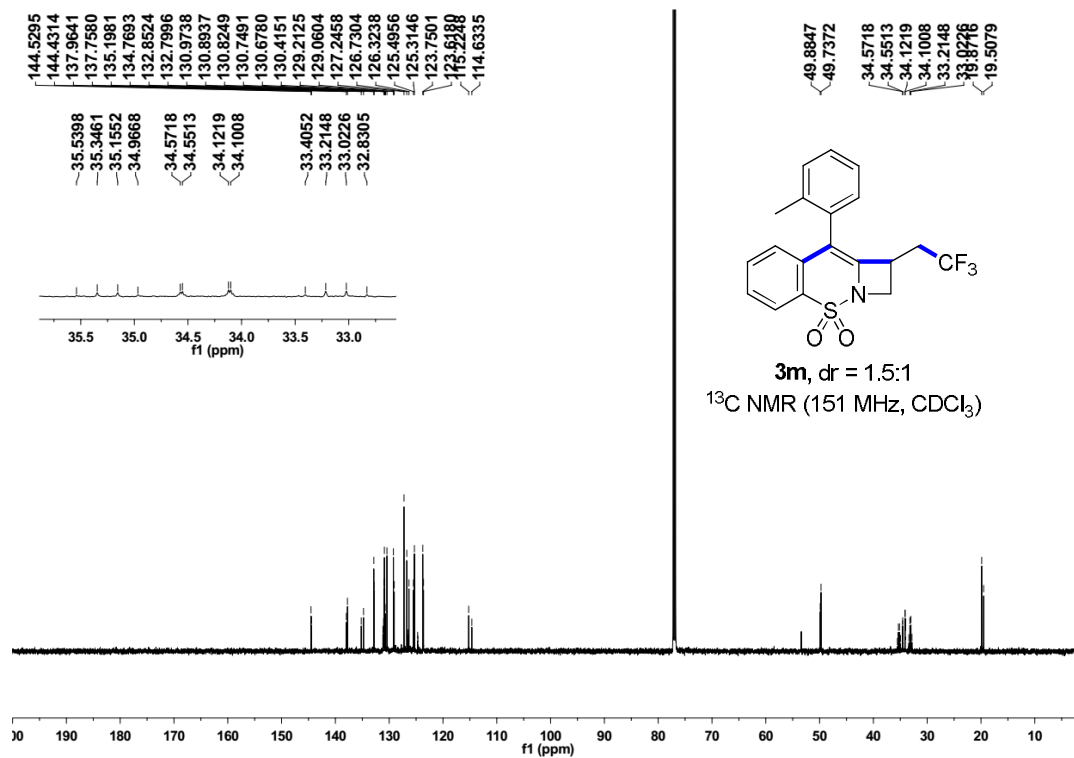

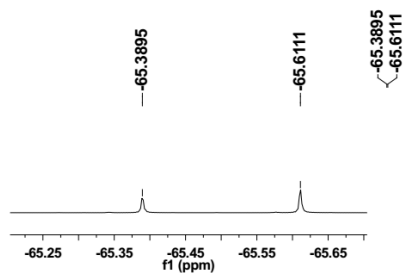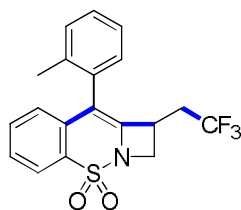

**3m**, dr = 1.5:1  
<sup>19</sup>F NMR (565 MHz, CDCl<sub>3</sub>)

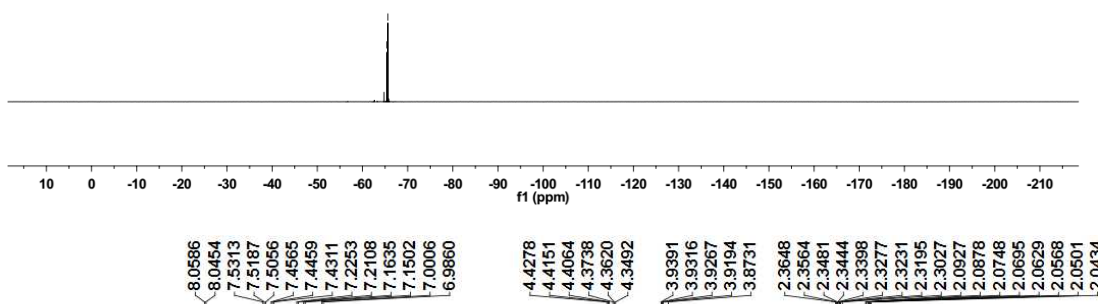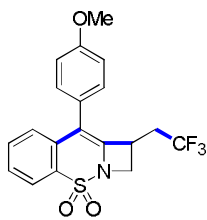

**3n**

<sup>1</sup>H NMR (600 MHz, CDCl<sub>3</sub>)

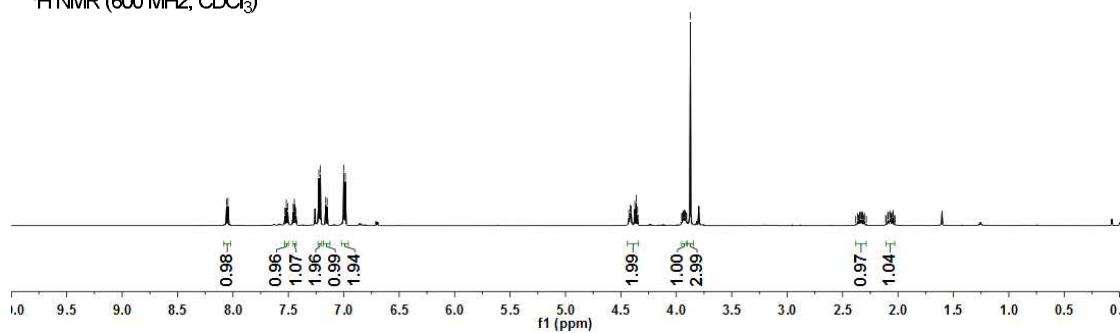



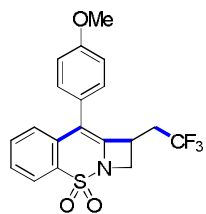

**3n**

<sup>13</sup>C NMR (151 MHz, CDCl<sub>3</sub>)

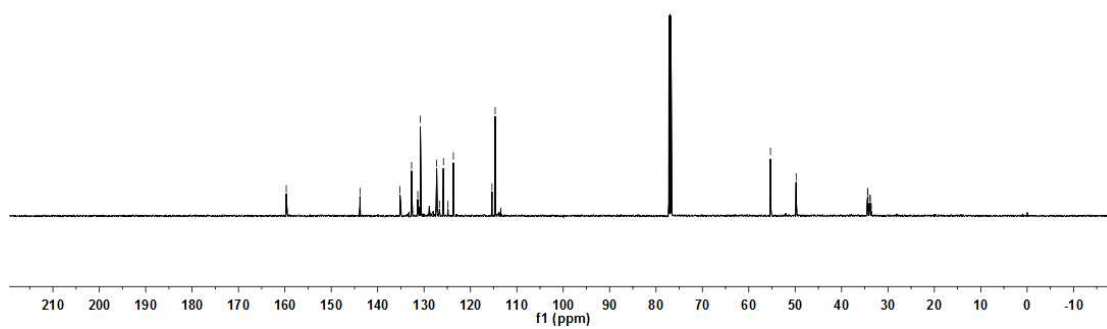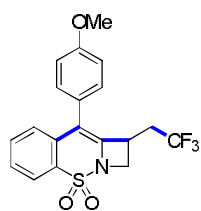

**3n**

<sup>19</sup>F NMR (565 MHz, CDCl<sub>3</sub>)

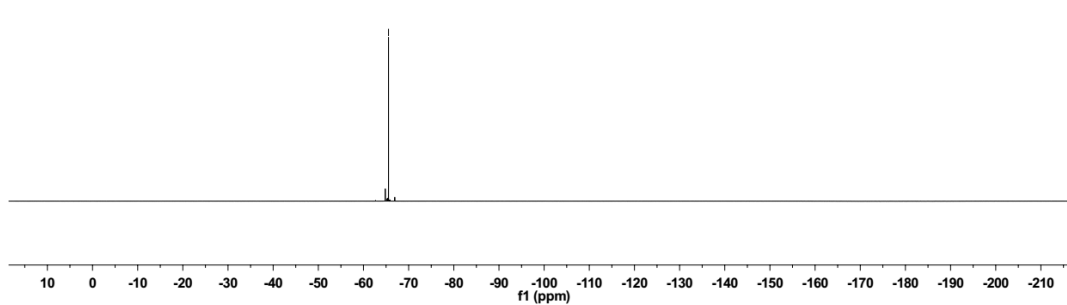

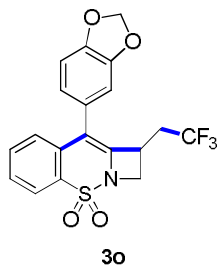

<sup>1</sup>H NMR (600 MHz, CDCl<sub>3</sub>)

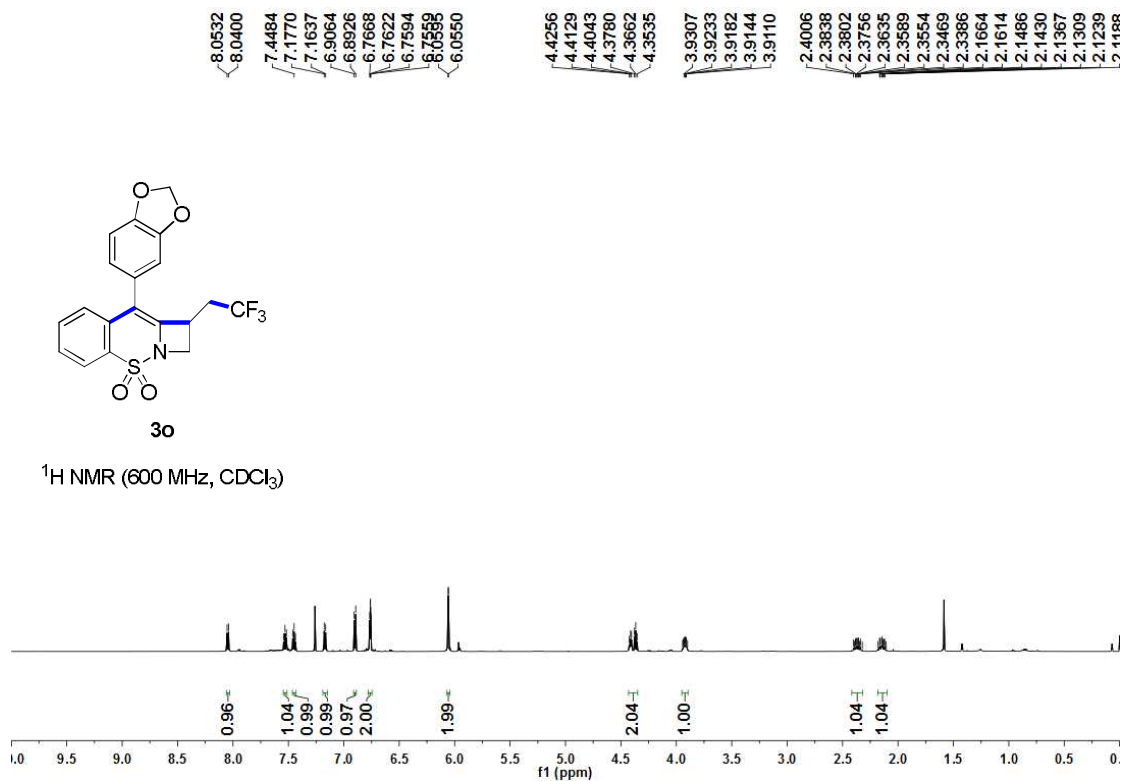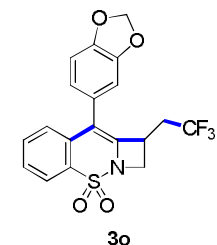

<sup>13</sup>C NMR (151 MHz, CDCl<sub>3</sub>)

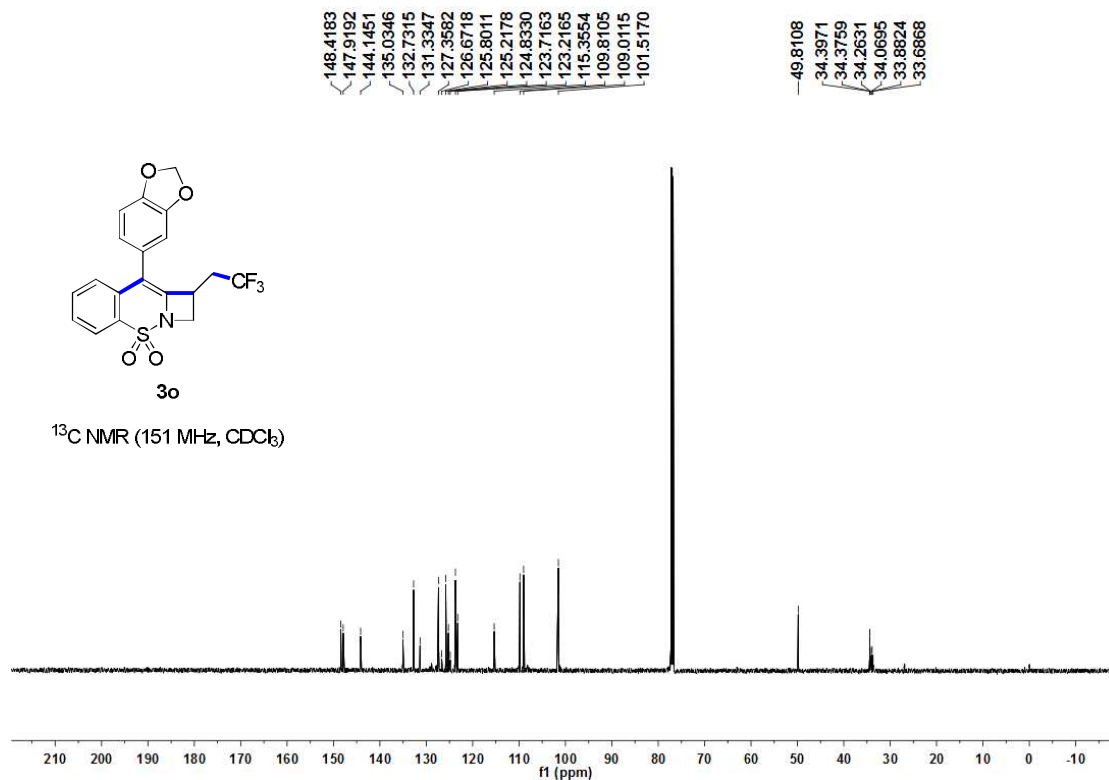

-65.4882

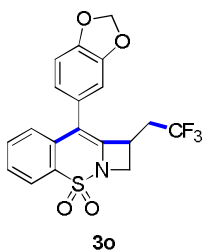

3o

$^{19}\text{F}$  NMR (565 MHz,  $\text{CDCl}_3$ )

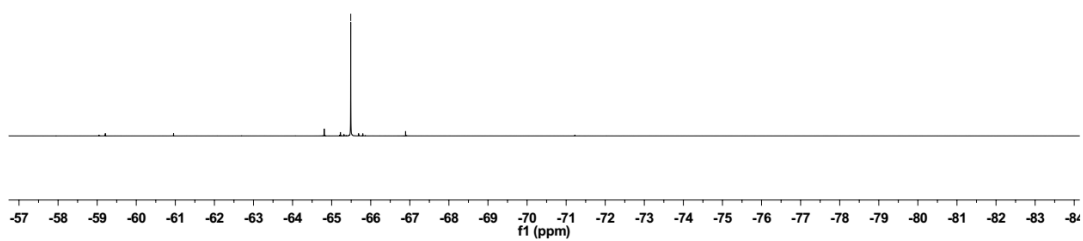

8.7093  
8.7032  
8.5987  
8.5964  
8.0750  
8.0734  
7.5515  
7.5501  
7.4686  
7.0558

4.4460  
4.4360  
3.9740  
3.9688  
3.9638  
3.9586  
3.9538  
3.9485  
2.4244  
2.4079  
2.4042  
2.3996  
2.3877  
2.3831  
2.3794  
2.3629  
2.0547  
2.0494  
2.0379  
2.0315  
2.0247  
2.0201  
2.0125  
2.0072

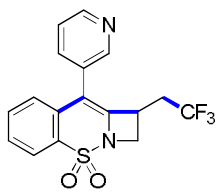

3p

$^1\text{H}$  NMR (600 MHz,  $\text{CDCl}_3$ )

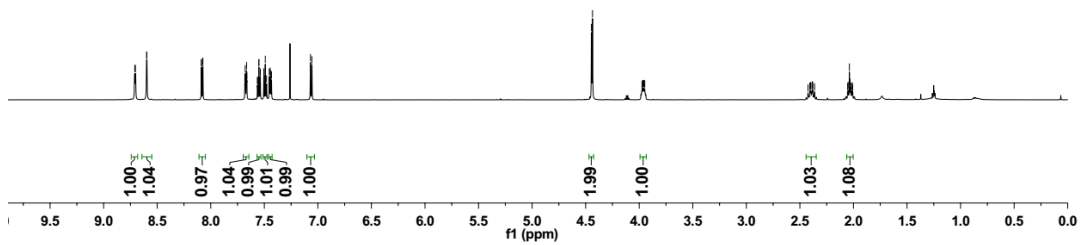

1.00  
1.04  
0.97  
1.04  
0.99  
1.01  
0.99  
1.00

1.99  
1.00  
1.03  
1.08

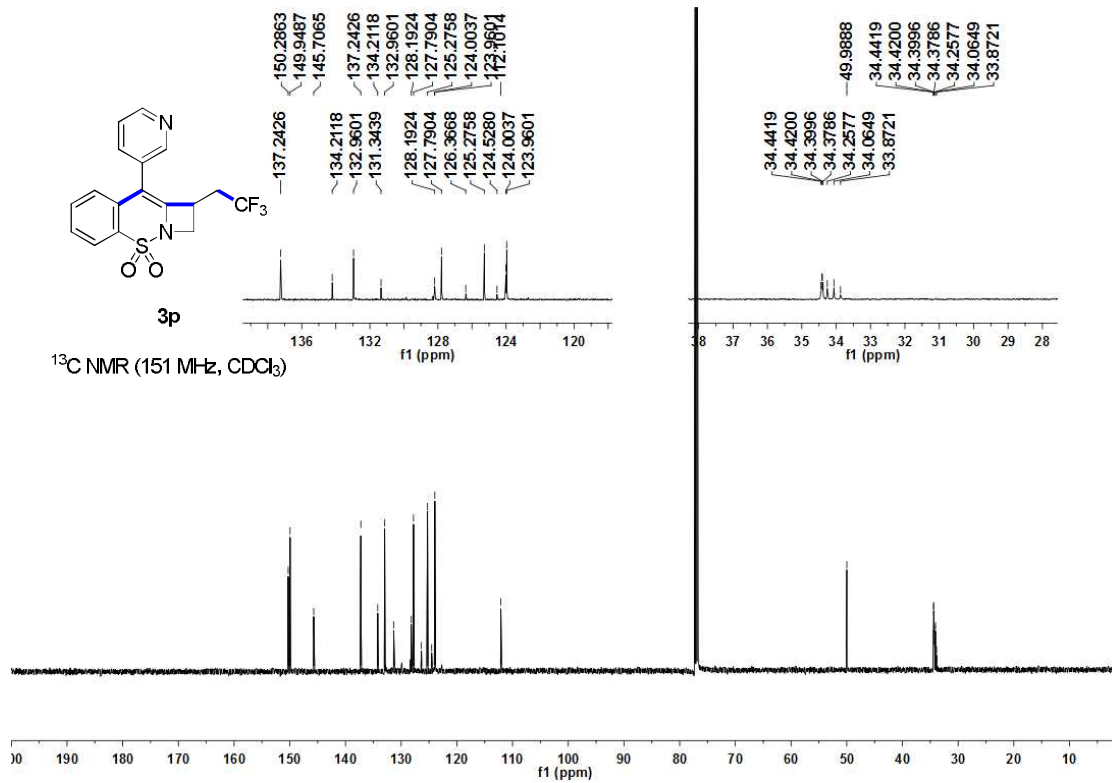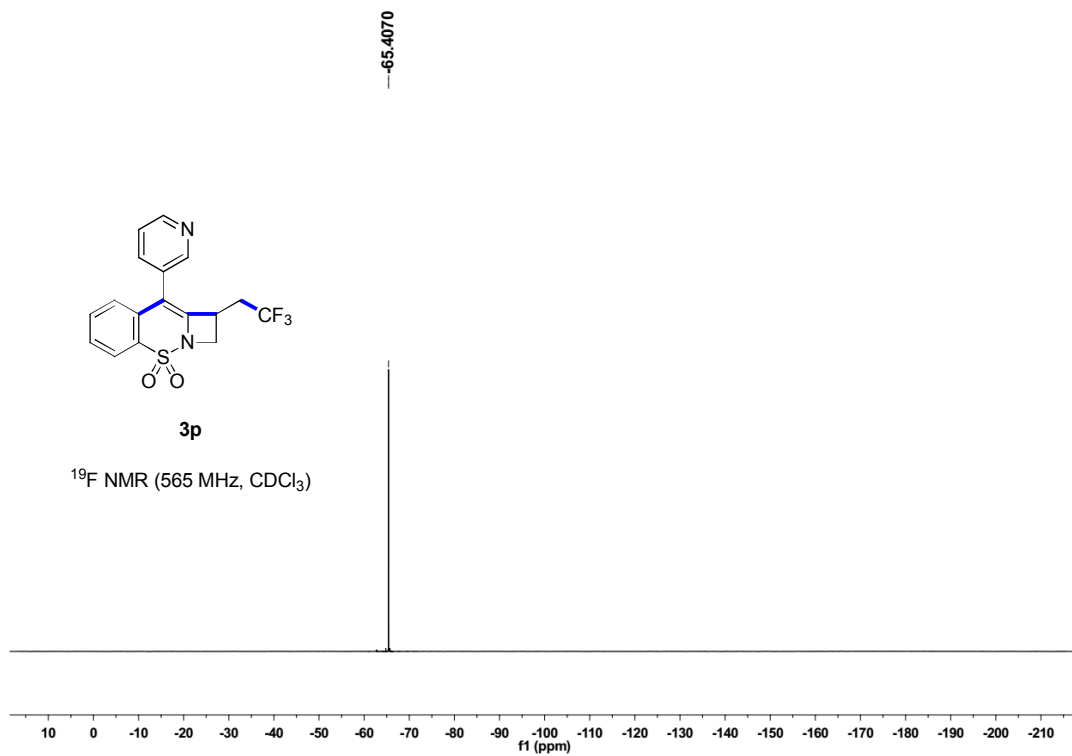

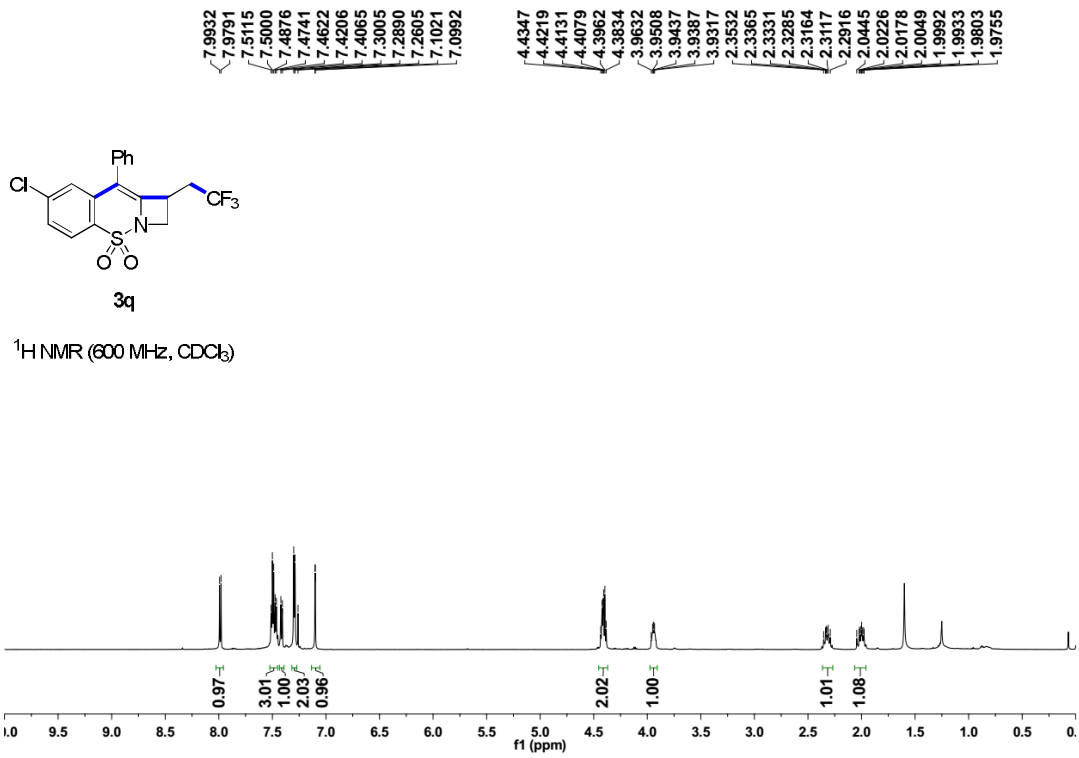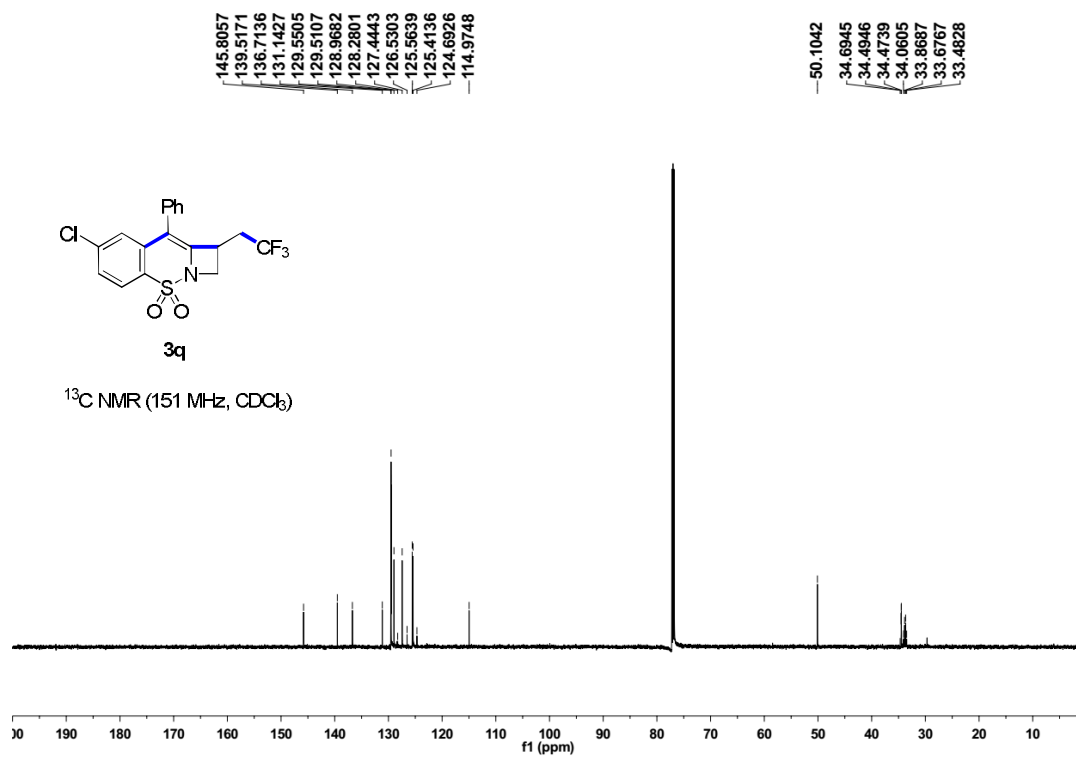

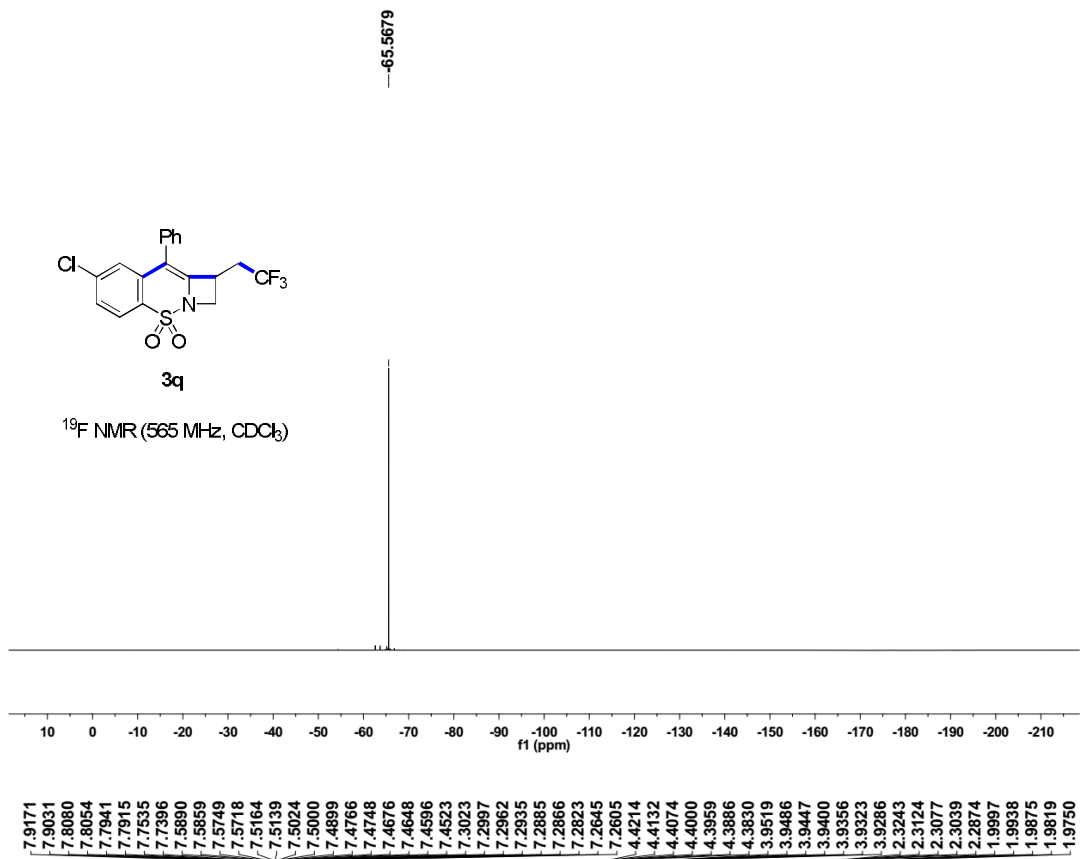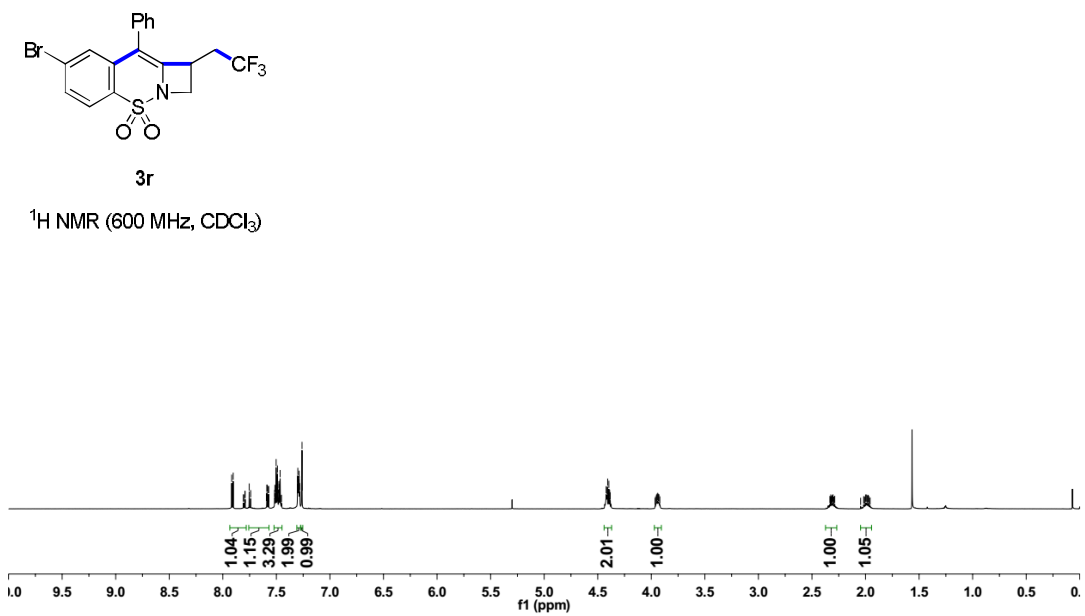

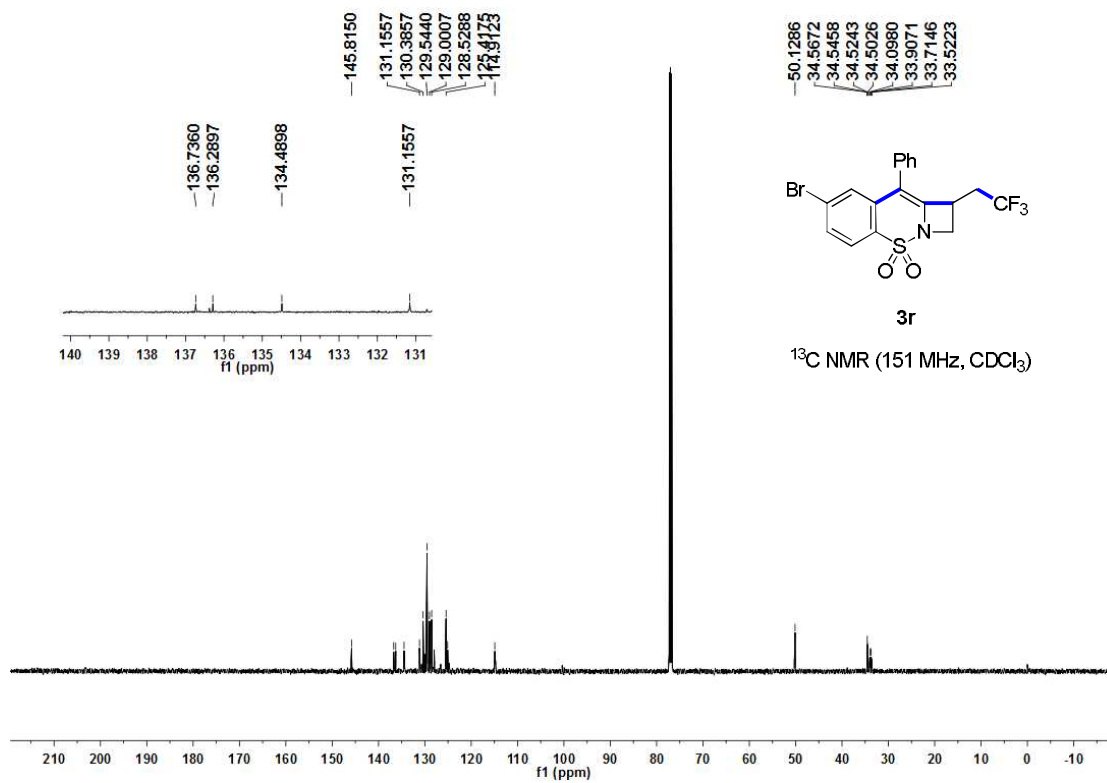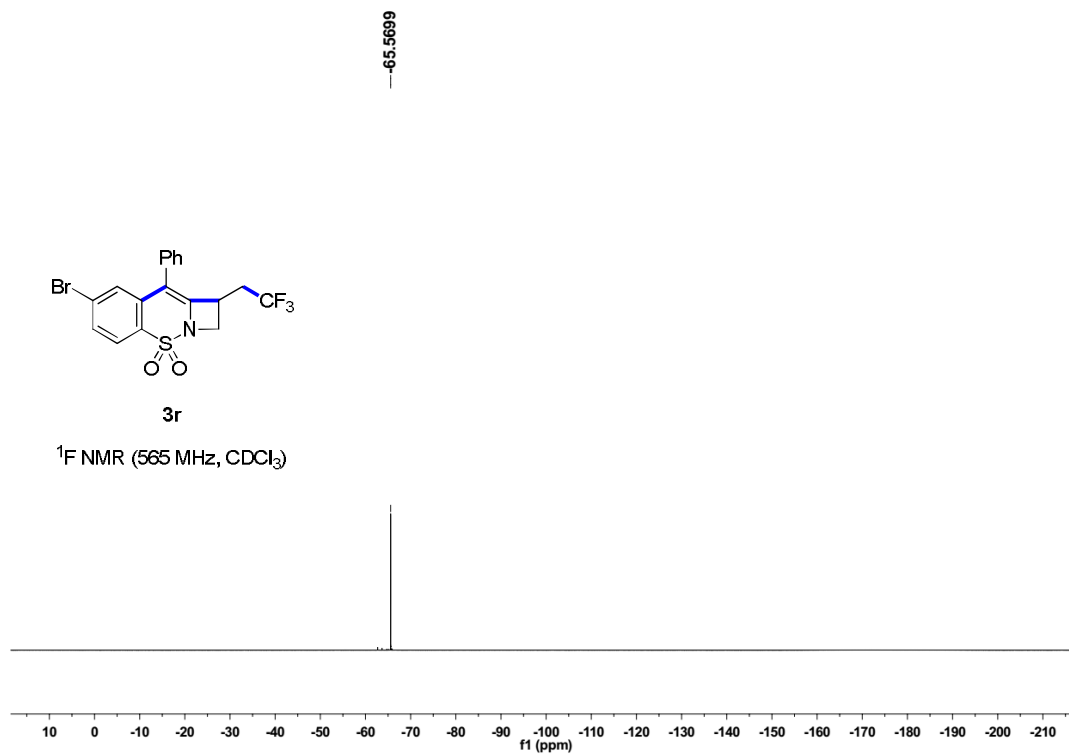

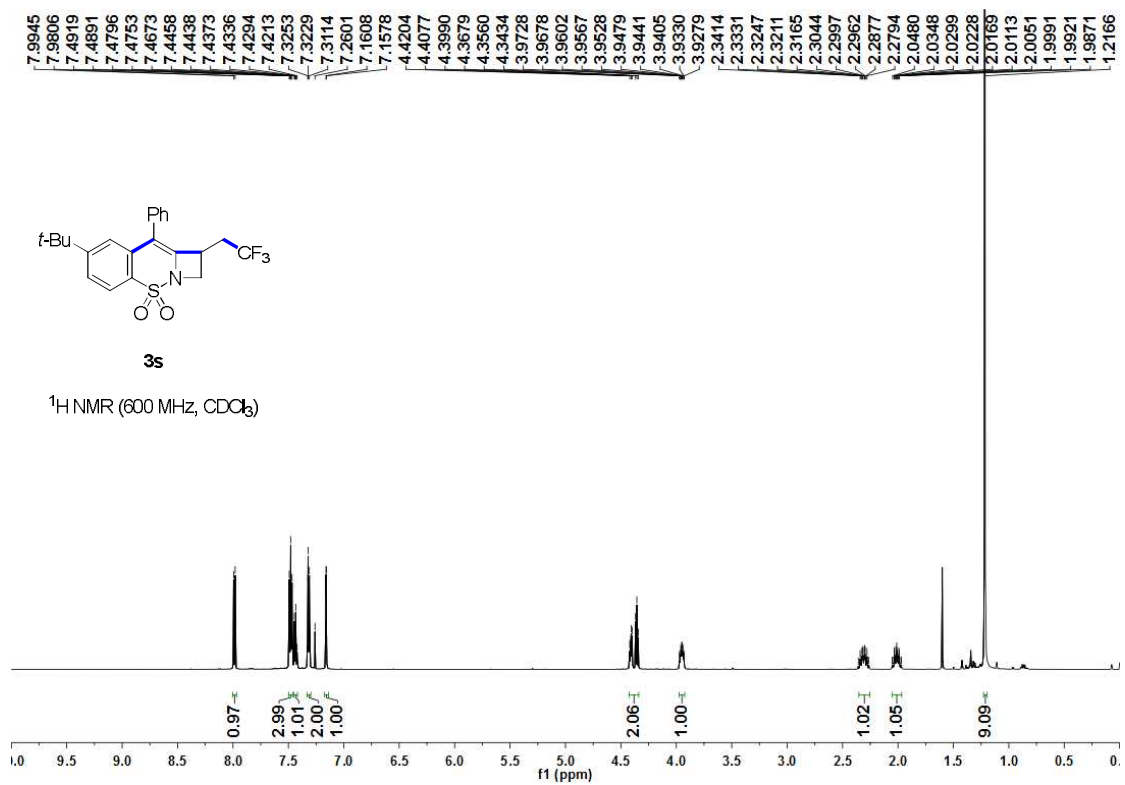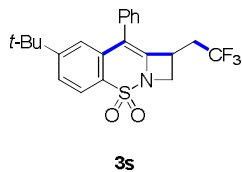

<sup>1</sup>H NMR (600 MHz, CDCl<sub>3</sub>)

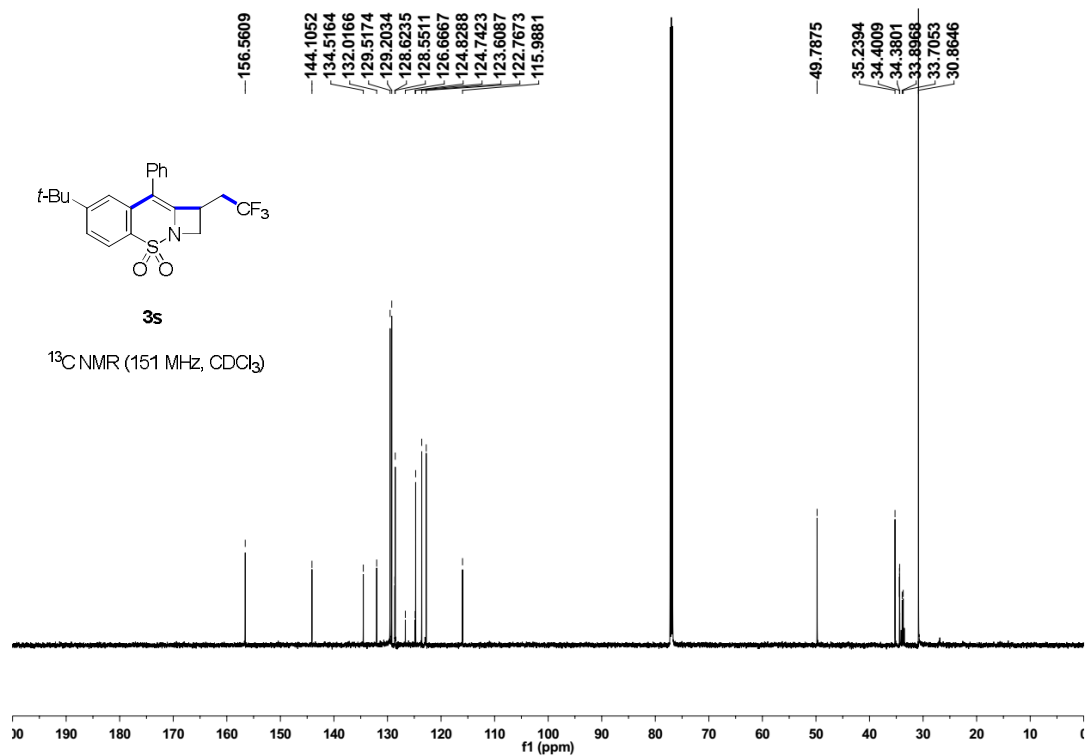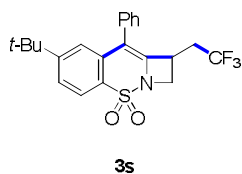

<sup>13</sup>C NMR (151 MHz, CDCl<sub>3</sub>)



--65.6015

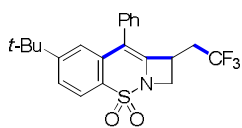

**3s**

$^{19}\text{F}$  NMR (565 MHz,  $\text{CDCl}_3$ )

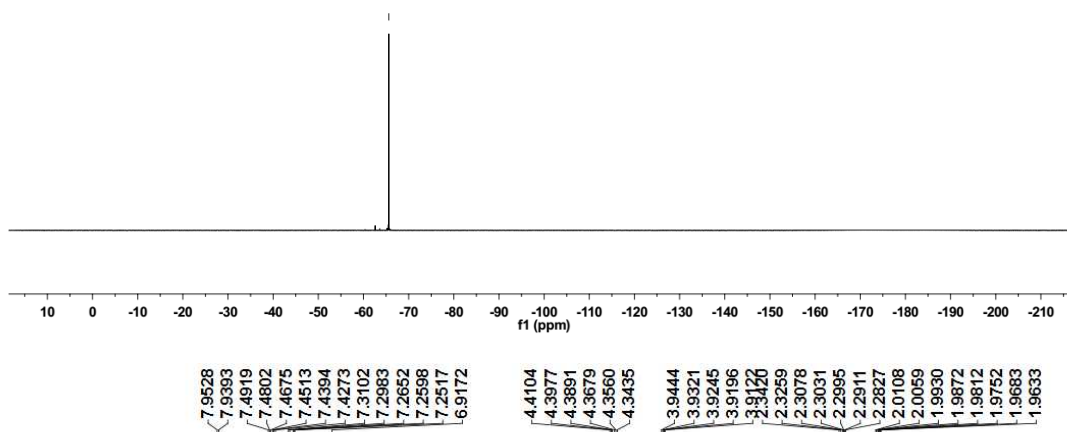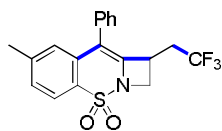

**3t**

$^1\text{H}$  NMR (600 MHz,  $\text{CDCl}_3$ )

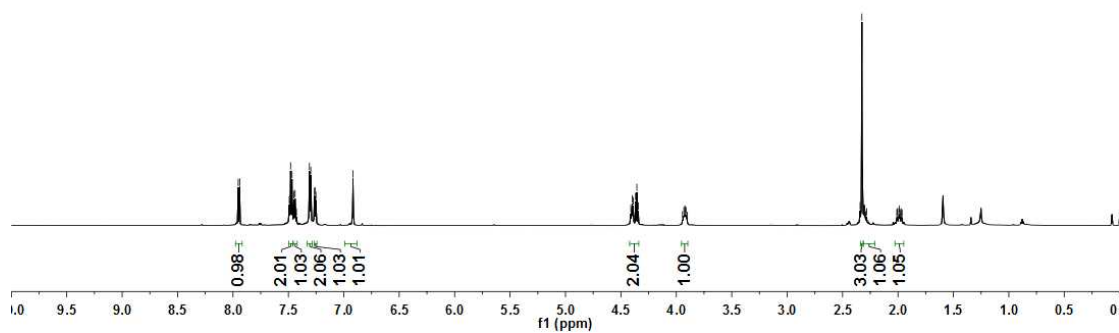

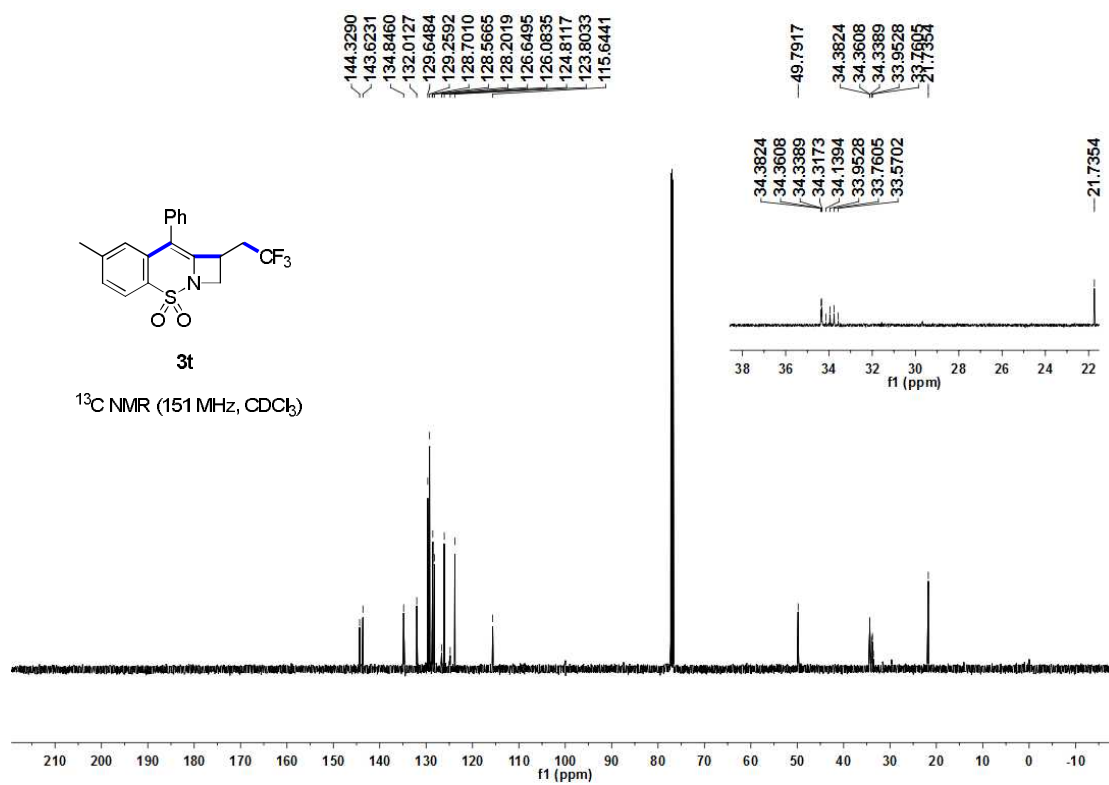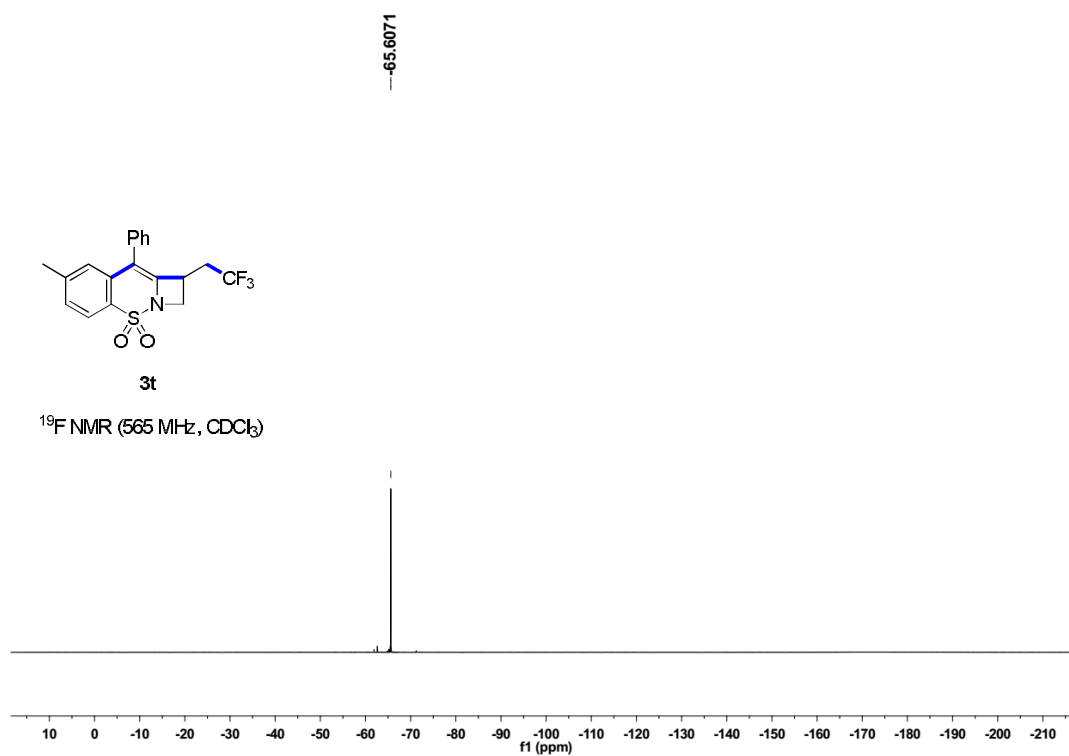

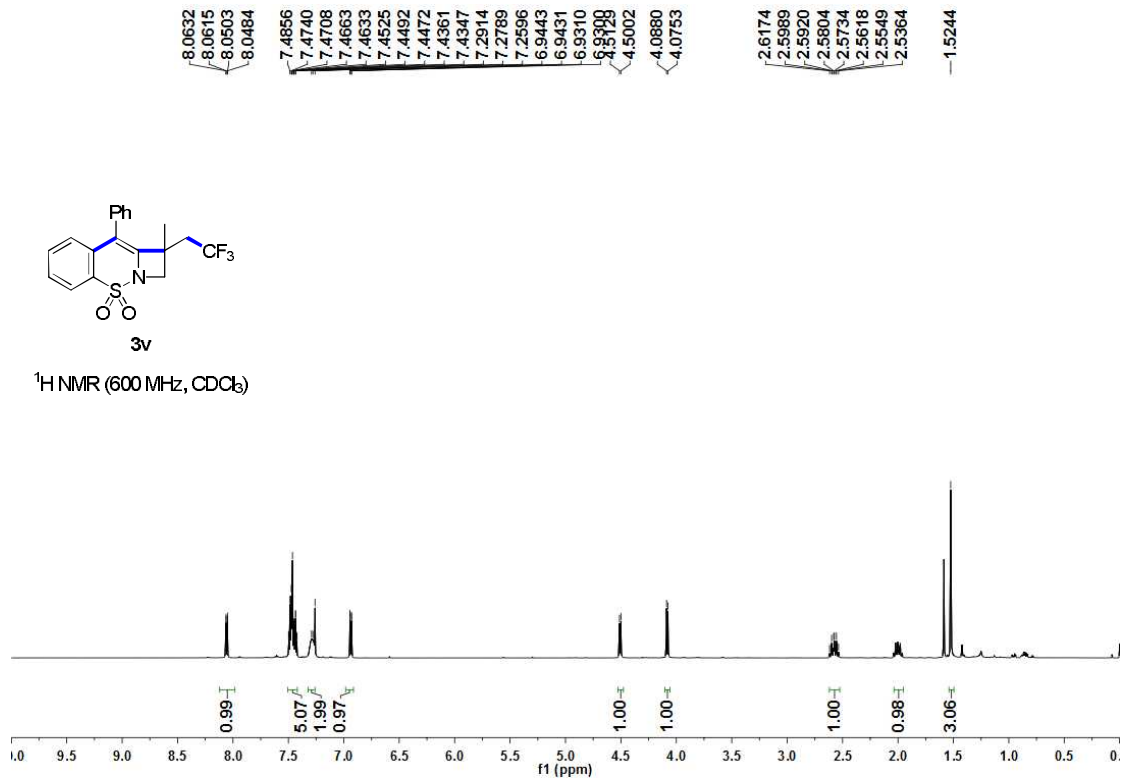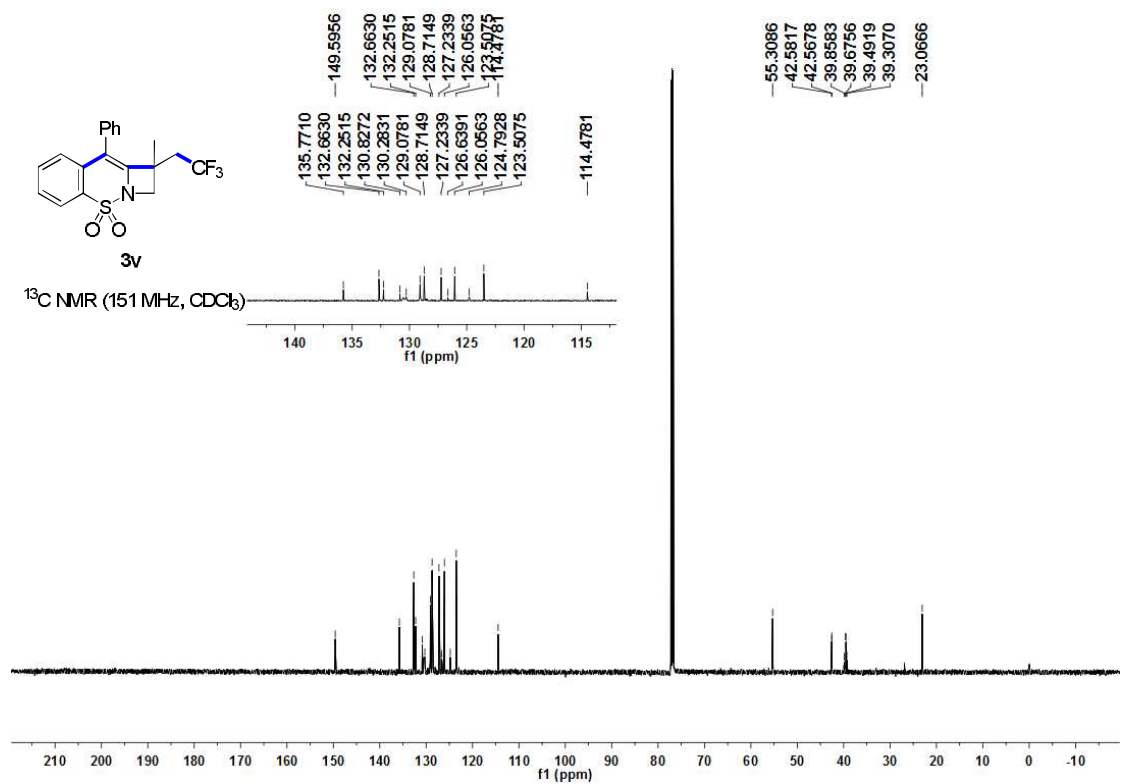

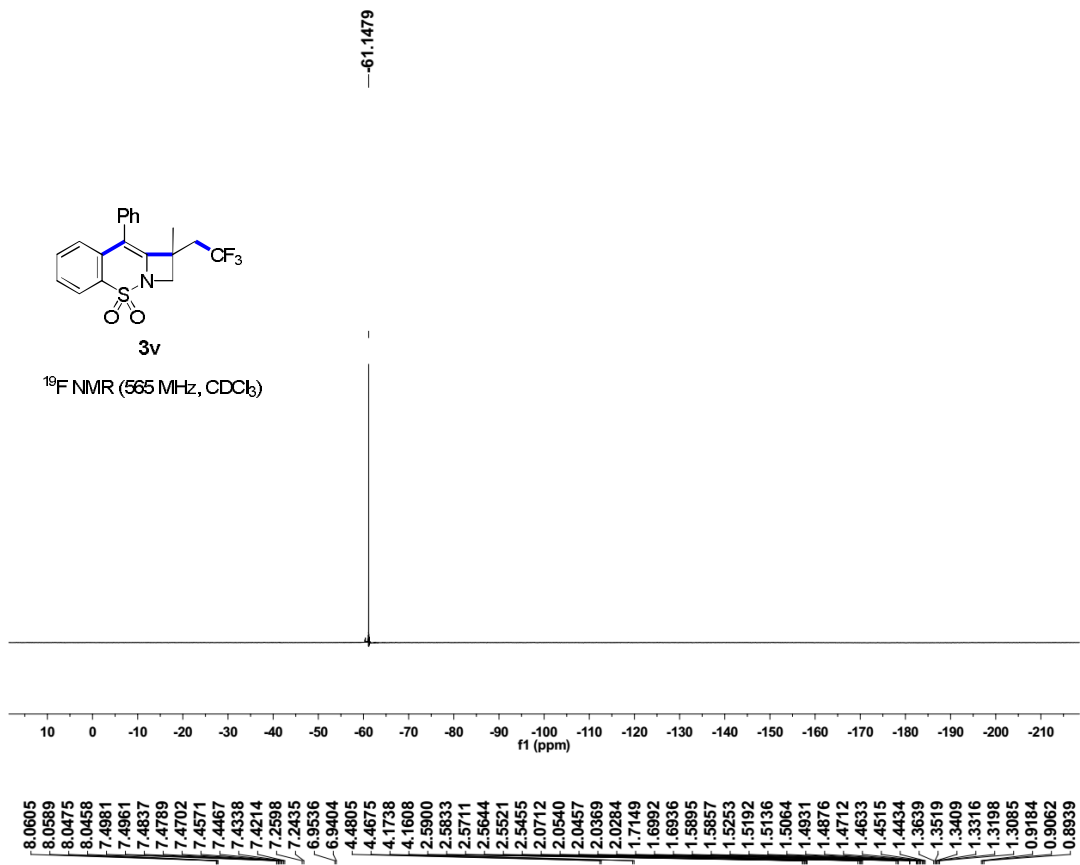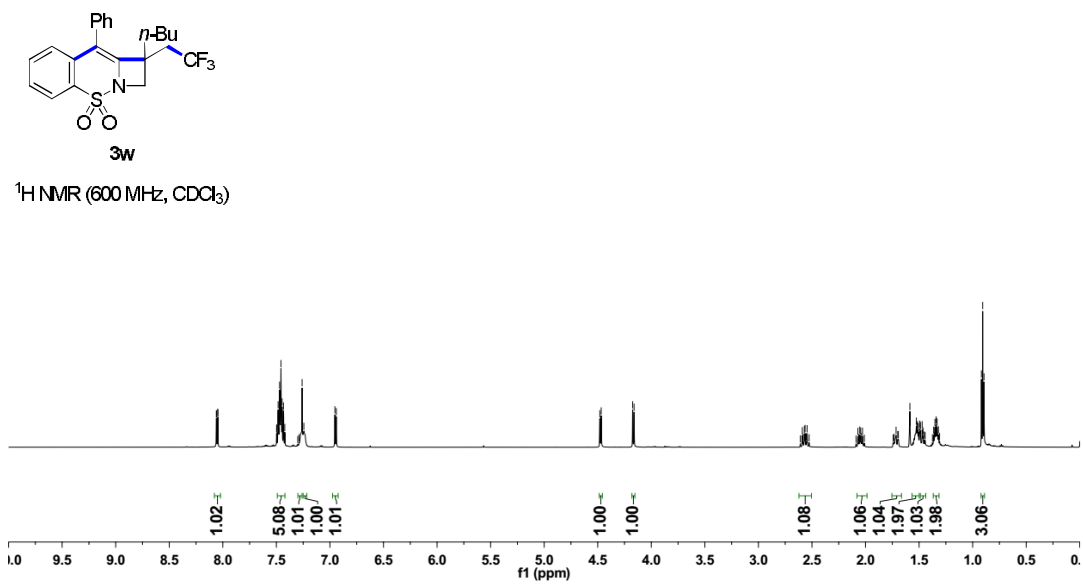

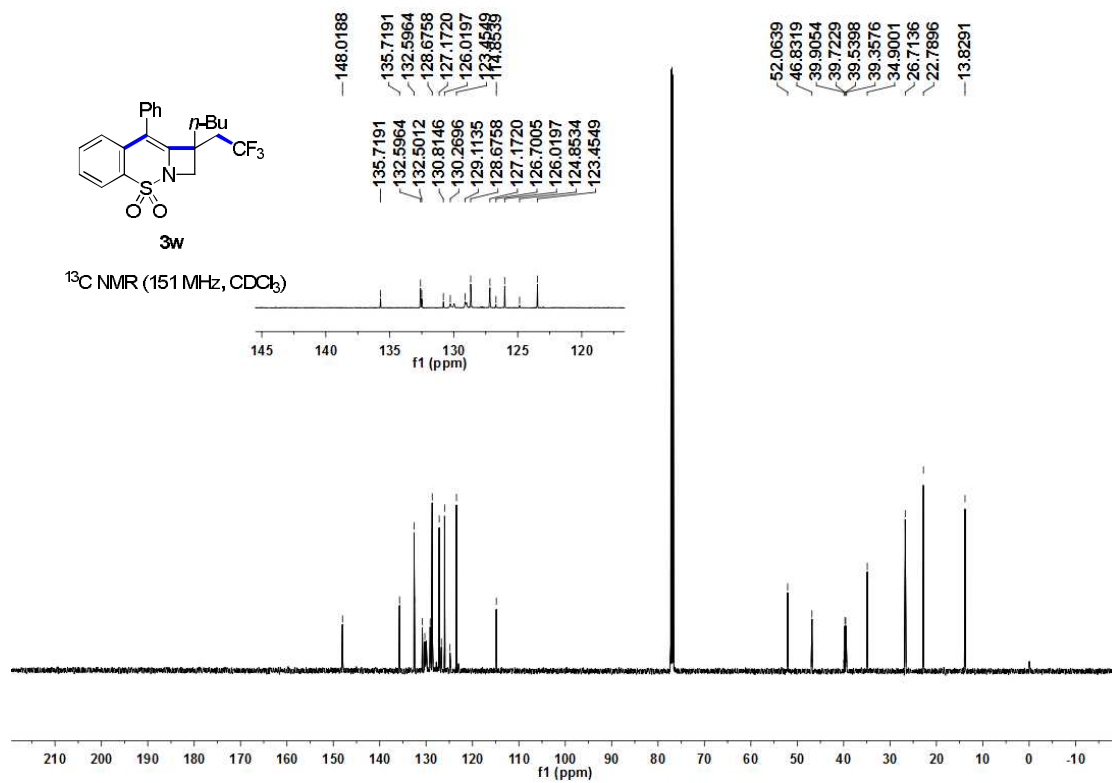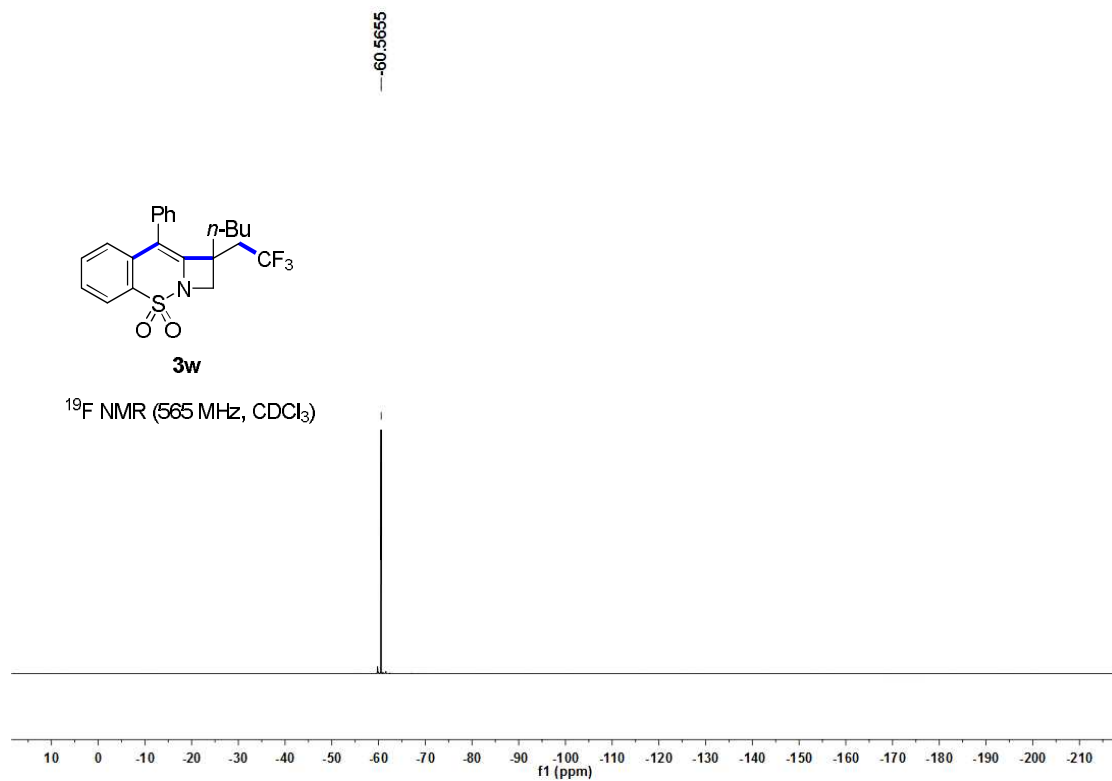

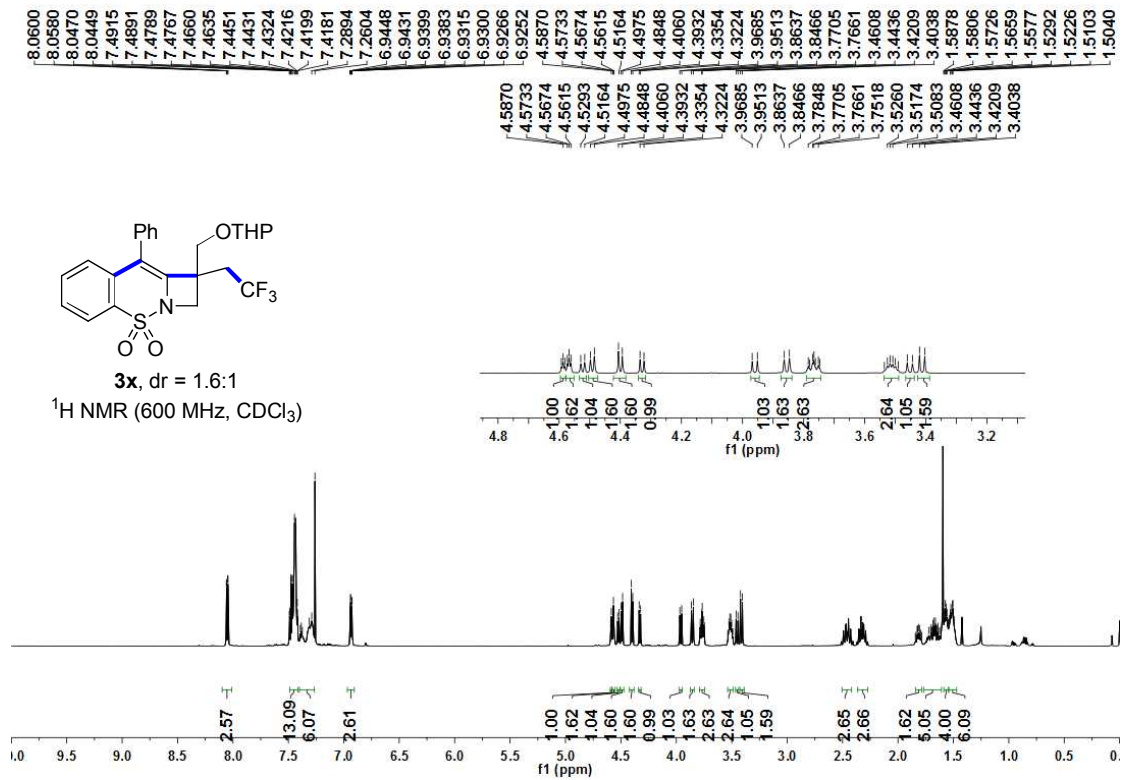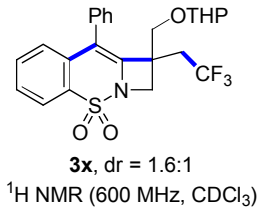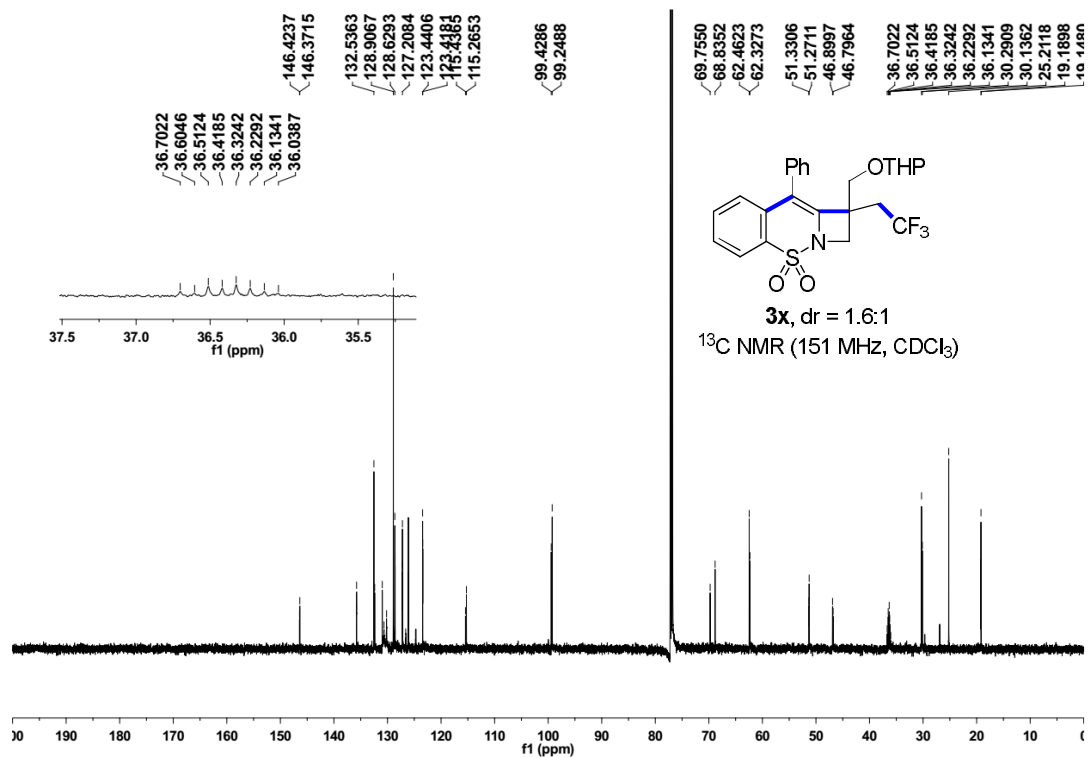

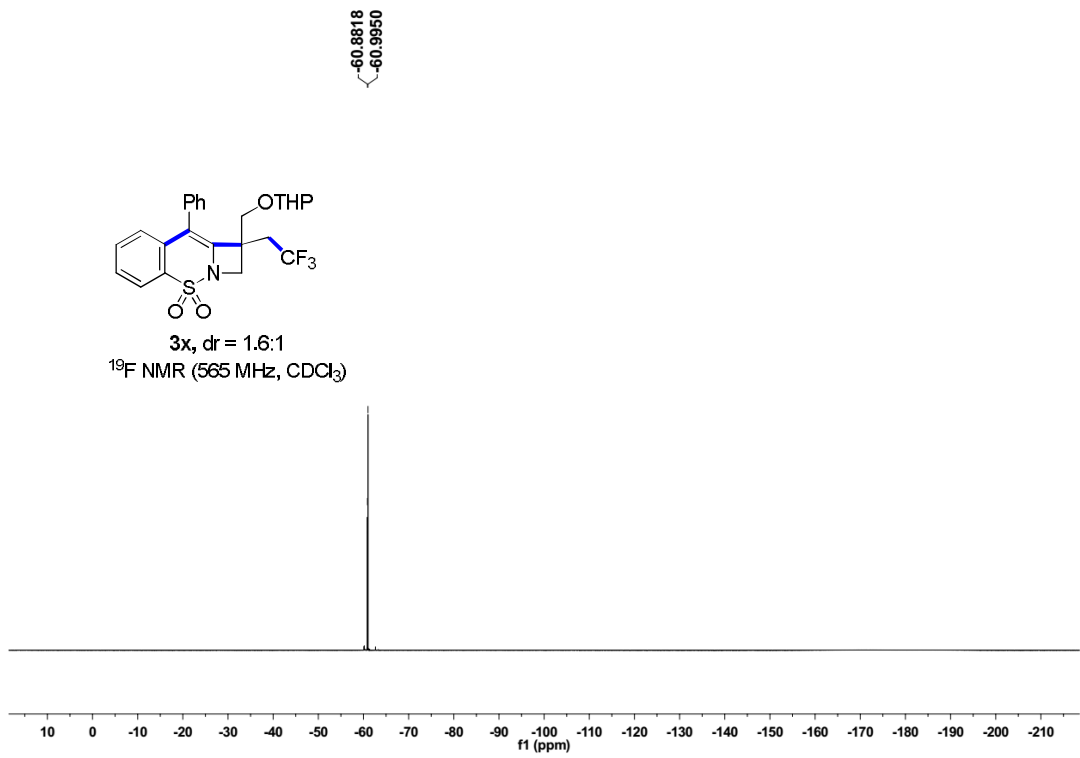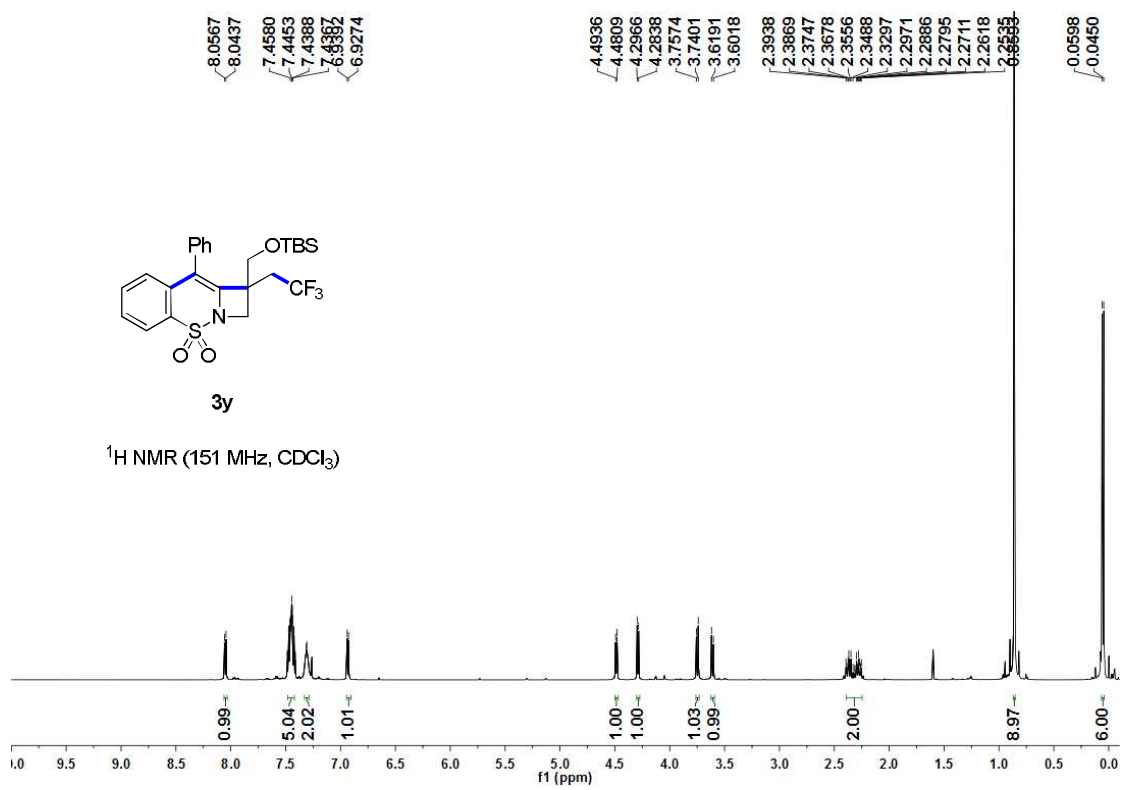

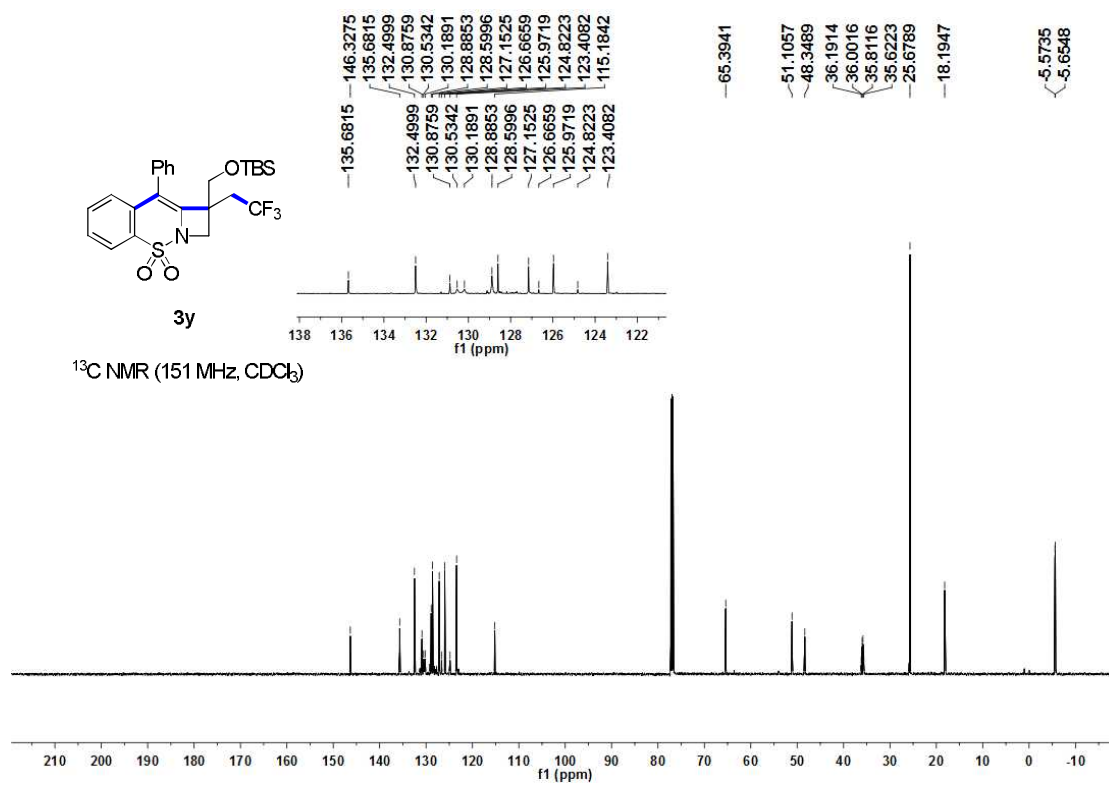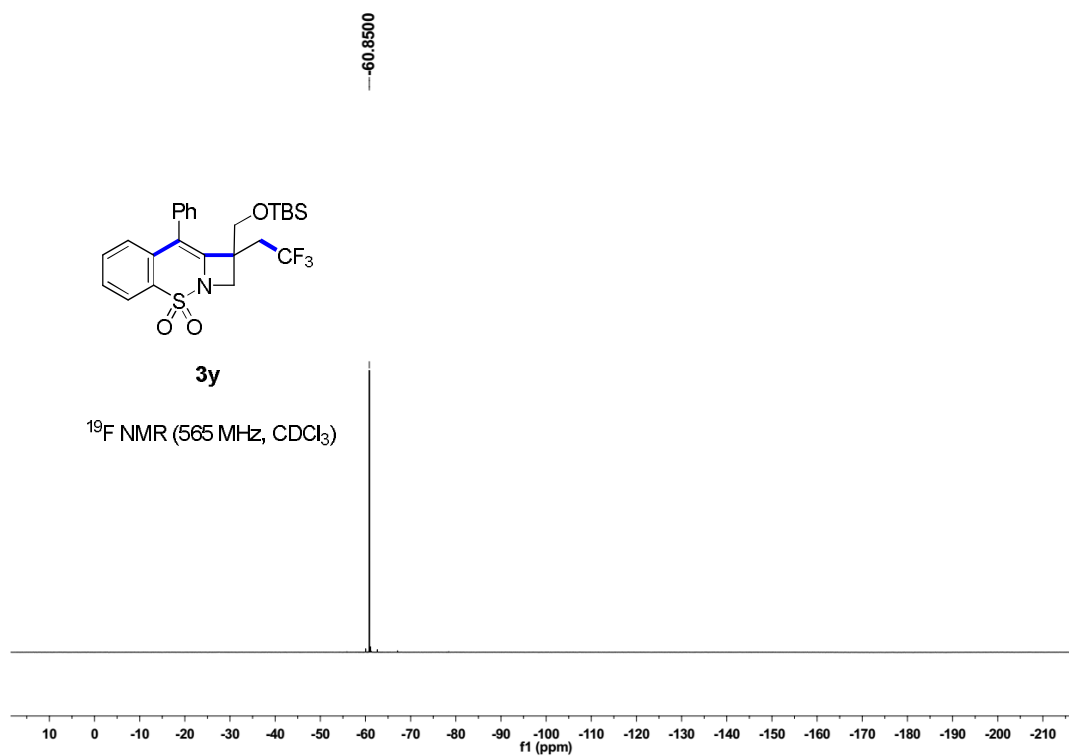



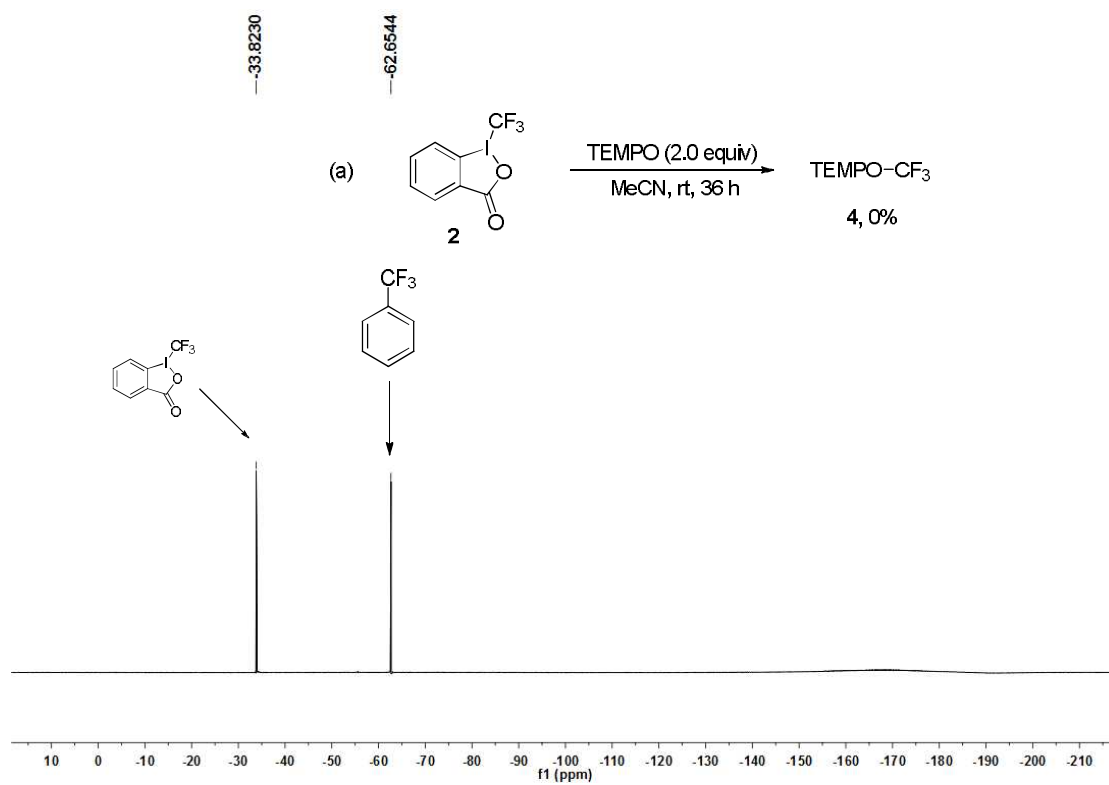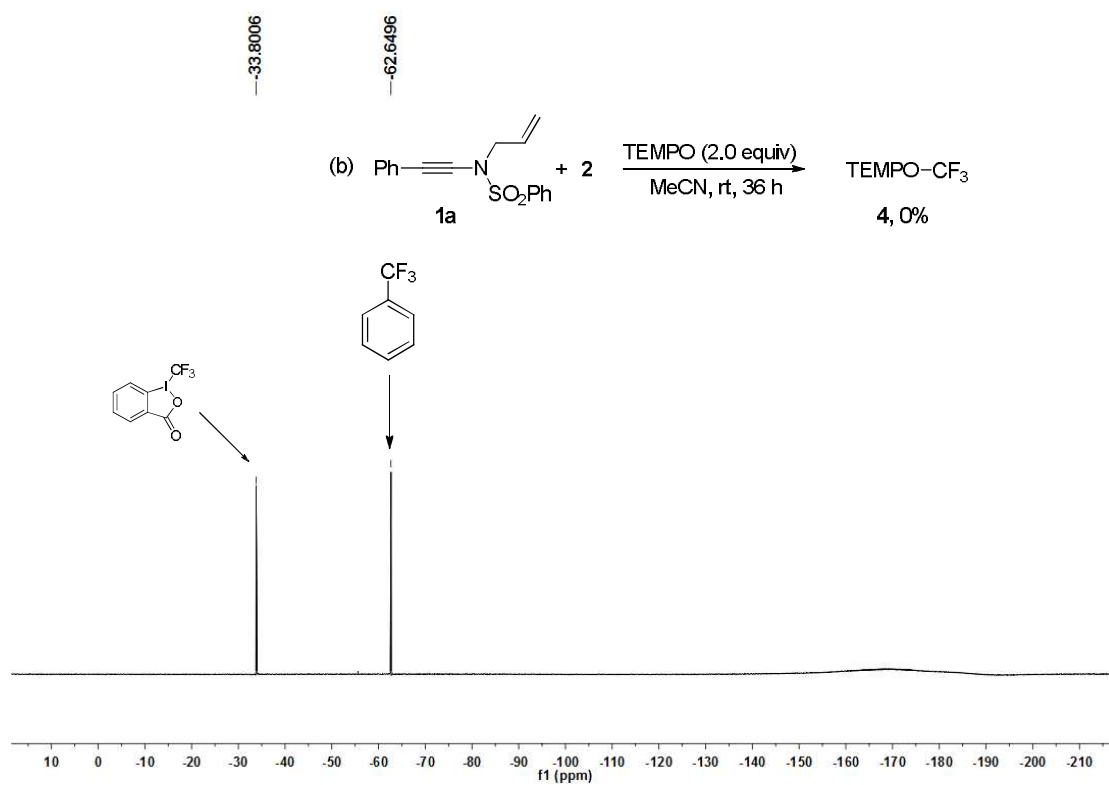

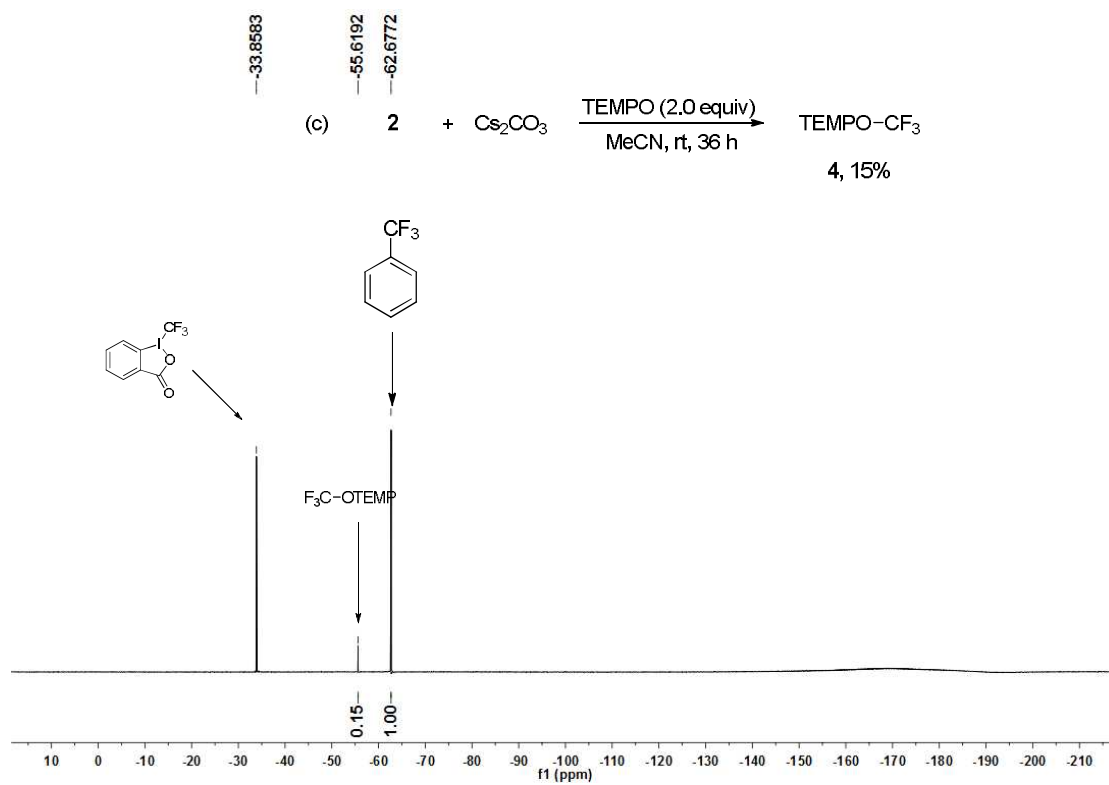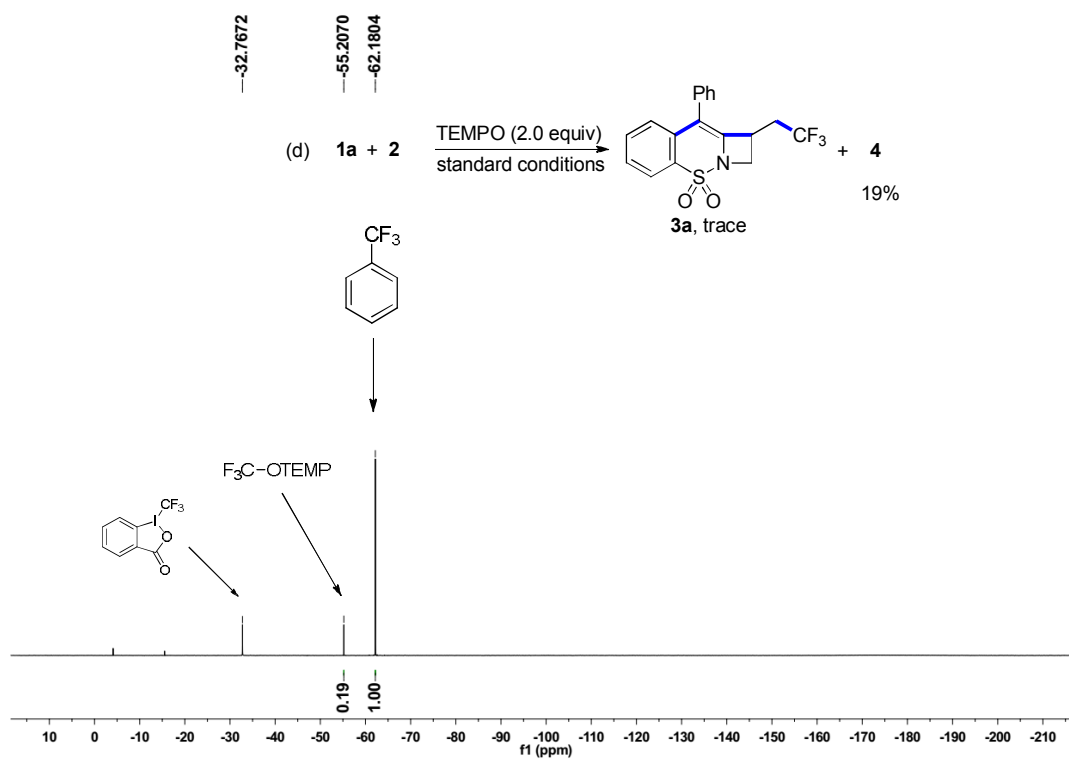

**X-Ray crystallographic data**

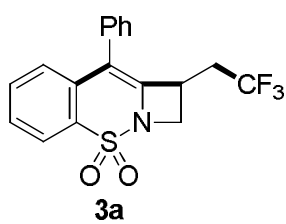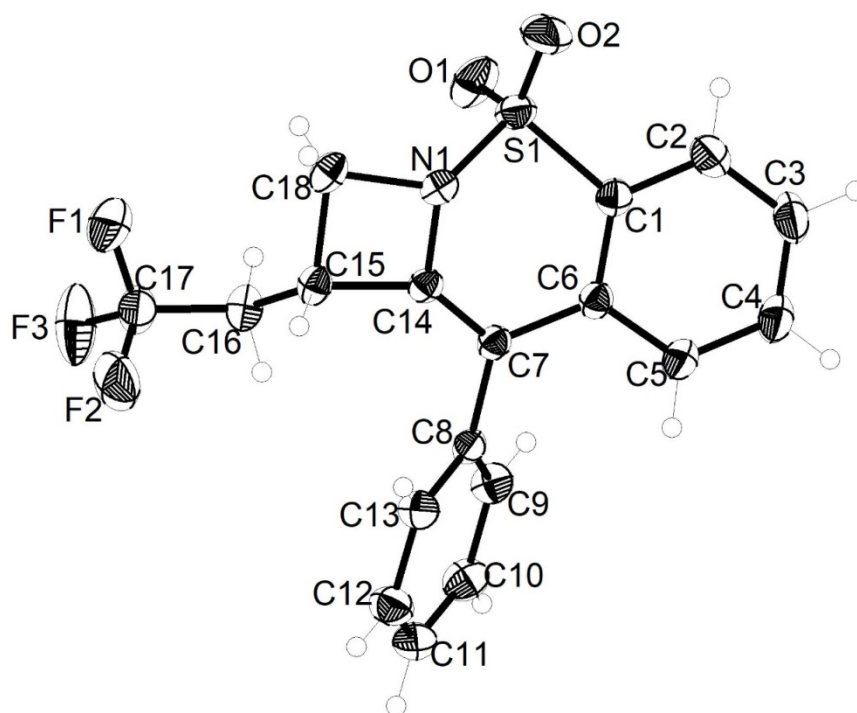

**Figure S1 ORTEP drawing of 3a showing the atom-labeling scheme and displacement ellipsoids drawn at the 50% probability level.**

## checkCIF/PLATON report

You have not supplied any structure factors. As a result the full set of tests cannot be run.

THIS REPORT IS FOR GUIDANCE ONLY. IF USED AS PART OF A REVIEW PROCEDURE FOR PUBLICATION, IT SHOULD NOT REPLACE THE EXPERTISE OF AN EXPERIENCED CRYSTALLOGRAPHIC REFEREE.

No syntax errors found.      CIF dictionary      Interpreting this report

### Datablock: 1

---

Bond precision:    C-C = 0.0033 A                      Wavelength=0.71073

Cell:                      a=10.8837(3)              b=16.9833(5)              c=9.3334(3)  
                                    alpha=90                      beta=103.008(2)              gamma=90

Temperature:              296 K

|                | Calculated        | Reported          |
|----------------|-------------------|-------------------|
| Volume         | 1680.93(9)        | 1680.93(9)        |
| Space group    | P 21/c            | P 1 21/c 1        |
| Hall group     | -P 2ybc           | -P 2ybc           |
| Moiety formula | C18 H14 F3 N O2 S | C18 H14 F3 N O2 S |
| Sum formula    | C18 H14 F3 N O2 S | C18 H14 F3 N O2 S |
| Mr             | 365.36            | 365.36            |
| Dx, g cm-3     | 1.444             | 1.444             |
| Z              | 4                 | 4                 |
| Mu (mm-1)      | 0.235             | 0.235             |
| F000           | 752.0             | 752.0             |
| F000'          | 752.95            |                   |
| h,k,lmax       | 14,22,12          | 14,21,12          |
| Nref           | 3828              | 3818              |
| Tmin,Tmax      |                   |                   |
| Tmin'          |                   |                   |

Correction method= Not given

Data completeness= 0.997                      Theta(max)= 27.434

R(reflections)= 0.0471( 3048)              wR2(reflections)= 0.1287( 3818)

S = 1.048                                      Npar= 227

---

The following ALERTS were generated. Each ALERT has the format  
**test-name\_ALERT\_alert-type\_alert-level**.  
Click on the hyperlinks for more details of the test.

---

### ● Alert level C

|                   |                                                  |              |
|-------------------|--------------------------------------------------|--------------|
| PLAT053_ALERT_1_C | Minimum Crystal Dimension Missing (or Error) ... | Please Check |
| PLAT054_ALERT_1_C | Medium Crystal Dimension Missing (or Error) ...  | Please Check |
| PLAT055_ALERT_1_C | Maximum Crystal Dimension Missing (or Error) ... | Please Check |
| PLAT790_ALERT_4_C | Centre of Gravity not Within Unit Cell: Resd. #  | 1 Note       |

C18 H14 F3 N O2 S

### ● Alert level G

|                   |                                               |              |
|-------------------|-----------------------------------------------|--------------|
| PLAT012_ALERT_1_G | No _shelx_res_checksum Found in CIF .....     | Please Check |
| PLAT242_ALERT_2_G | Low 'MainMol' Ueq as Compared to Neighbors of | C17 Check    |
| PLAT434_ALERT_2_G | Short Inter HL..HL Contact F3 ..F3            | 2.65 Ang.    |
|                   | 3-x, -y, -z =                                 | 3_855 Check  |
| PLAT793_ALERT_4_G | Model has Chirality at C15 (Centro SPGR)      | R Verify     |

---

0 ALERT level A = Most likely a serious problem - resolve or explain  
0 ALERT level B = A potentially serious problem, consider carefully  
4 ALERT level C = Check. Ensure it is not caused by an omission or oversight  
4 ALERT level G = General information/check it is not something unexpected

4 ALERT type 1 CIF construction/syntax error, inconsistent or missing data  
2 ALERT type 2 Indicator that the structure model may be wrong or deficient  
0 ALERT type 3 Indicator that the structure quality may be low  
2 ALERT type 4 Improvement, methodology, query or suggestion  
0 ALERT type 5 Informative message, check

---

It is advisable to attempt to resolve as many as possible of the alerts in all categories. Often the minor alerts point to easily fixed oversights, errors and omissions in your CIF or refinement strategy, so attention to these fine details can be worthwhile. In order to resolve some of the more serious problems it may be necessary to carry out additional measurements or structure refinements. However, the purpose of your study may justify the reported deviations and the more serious of these should normally be commented upon in the discussion or experimental section of a paper or in the "special\_details" fields of the CIF. checkCIF was carefully designed to identify outliers and unusual parameters, but every test has its limitations and alerts that are not important in a particular case may appear. Conversely, the absence of alerts does not guarantee there are no aspects of the results needing attention. It is up to the individual to critically assess their own results and, if necessary, seek expert advice.

### Publication of your CIF in IUCr journals

A basic structural check has been run on your CIF. These basic checks will be run on all CIFs submitted for publication in IUCr journals (*Acta Crystallographica*, *Journal of Applied Crystallography*, *Journal of Synchrotron Radiation*); however, if you intend to submit to *Acta Crystallographica Section C* or *E* or *IUCrData*, you should make sure that full publication checks are run on the final version of your CIF prior to submission.

### Publication of your CIF in other journals

Please refer to the *Notes for Authors* of the relevant journal for any special instructions relating to CIF submission.

PLATON version of 22/03/2021; check.def file version of 19/03/2021

Datablock 1 - ellipsoid plot

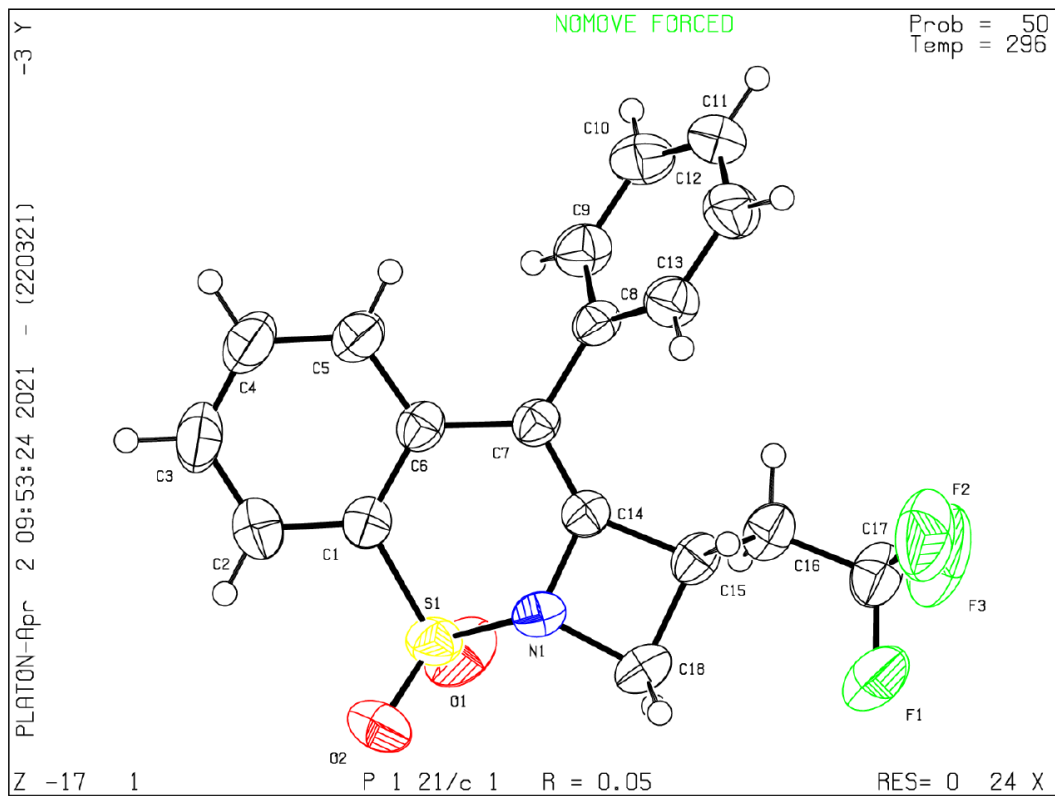

Supplement: d1qo00559f1.pdf [file d1qo00559f1.pdf]
